# Supplementary material for: Study of 32 new phage tail-like bacteriocins (pyocins) from a clinical collection of Pseudomonas aeruginosa and of their potential use as typing markers and antimicrobial agents
Source: Sci Rep. 2023 Jan 3;13:117. doi: 10.1038/s41598-022-27341-1 (PMC9810705; doi:10.1038/s41598-022-27341-1)
Supplement: Supplementary file 1 — Supplementary Table S1. [file 41598_2022_27341_MOESM1_ESM.xlsx]

## Sheet: 1-13_pyoR5
Position	Protein function	Start	Stop	Strand	Nucleotide sequence	Amino acid (AA) sequence
ORF01	Pyocin activator protein PrtN	315	1	-	gtgcagccaaccatcgcccctaccactccaattccacgccaggaaaccgtggaattggtctaccgcatcttcggcgacgtcctggtgccgctggagcaggtccgcgaacgctggtttcgcaacctgaacaaggaaaacttcagcaaggccctggcatgcgggcggatcgccctgccagtgacgaccctcgacgatagccacaaggccatgcagttcgtggccctcgatcacctcgccgcctacgtcgaccagcgcgcgaaccaagccggaagcgcccgtcgagcacagccaggcgcggacagcatcgcatcctga	MQPTIAPTTPIPRQETVELVYRIFGDVLVPLEQVRERWFRNLNKENFSKALACGRIALPVTTLDDSHKAMQFVALDHLAAYVDQRANQAGSARRAQPGADSIAS
ORF02	HTH-type transcriptional regulator PrtR	1185	415	-	atggacaagagcacccagatcccgcccgacagcttcgccgctcgcctcaagcaggccatggcgatgcgcaacctgaagcaggaaaccctcgccgaagcggcaggggtttcgcagaacaccattcacaagctgacctcgggcaaggcccagagcacccgcaagctgatcgagatcgcggcggccctgggcgtttcgccggtctggctgcagaccggcgaaggcactccagccgcgcgcagtgccgtgtccgtggccgatggcagcccattggtgctggaaccgctgcatccgtgggacagcgacacaccgctggacgaagacgaagtggaactgccgctgtacaaggaagtggagatgtccgccggcgccggacgcactgcggtacgcgagatagagggg…	MDKSTQIPPDSFAARLKQAMAMRNLKQETLAEAAGVSQNTIHKLTSGKAQSTRKLIEIAAALGVSPVWLQTGEGTPAARSAVSVADGSPLVLEPLHPWDSDTPLDEDEVELPLYKEVEMSAGAGRTAVREIEGRKLRFSYATLRASGVDPSAAICAQLTGNSMEPLIMDGSTIGVDTATTHITDGEIYALEHDGMLRVKFVYRLPGGGIRLRSFNREEYPDEEYSPEDMRSRQISMIGWVFWWSTVRHRRAPSLVR
ORF03	Hypothetical protein	1440	1270	-	atggacggcgctccggccctccagatgccggagcgctttcccgtggccccggcacccaagcagtcggcacctgcatcgtcggtcgccgacaaccgggtgtgtccctgcacccatgtgaaatctctgaaaggcgggtgggaagttgtggaactcaccccttccgctttctga	MDGAPALQMPERFPVAPAPKQSAPASSVADNRVCPCTHVKSLKGGWEVVELTPSAF
ORF04	Repressor, PtrB	1643	1843	+	atggctgaccttgccgatcacgccaacgaactggtcctggctcgcctcgacggcctcctggcggcgcgcccggcgctggccatccgcgagtccgcggaagactgcgaggactgcggcgagcccattccccaggcgcgccgtcgggcggcaccgggttgcagtcgctgcatcgactgccaggaccgccacgagcgccgttga	MADLADHANELVLARLDGLLAARPALAIRESAEDCEDCGEPIPQARRRAAPGCSRCIDCQDRHERR
ORF05	Antiterminator Q protein; RNA polymerase	1891	2250	+	gtgatcaaagccatcgatgaaatgctcaagctctgggccgaggaaatgcacgcgccaggcagcaacggaggcggctacgccggcggcaacctgatcgccatgctgatcgccagcaagggcgaggtggtccgcggccaccgtggcagccgggtgatcctcgaccgtgtggcggaggtcgatcgcctggtaaatcgcctacccgaggaactgaagaccgtggtggtggagcactatctcaatcgcgacagcttccccgagcagaagtaccgtcactgcggttgcagccgcaacaccttctatctgcgcctgcatgtggcgcaccagggtatccaggacggcctgctgcgacgggcggcctga	MIKAIDEMLKLWAEEMHAPGSNGGGYAGGNLIAMLIASKGEVVRGHRGSRVILDRVAEVDRLVNRLPEELKTVVVEHYLNRDSFPEQKYRHCGCSRNTFYLRLHVAHQGIQDGLLRRAA
ORF06	Pyocin R2, holin	2709	3062	+	atgggcaacgaaccgcagacactgacggaaatgccgctctgggtactgatcctgctcgccgcgctgggcggcgtcagcggcgagatgtggcgtgccgacaaggccggtctcggcggctgggccttgttgcggcgcctggcgctgcgctccggcgcgtcgatcgtctgcggcgtggcggtgatgctgctggcgttggcttgcggcgccgcgctgctgttcgccgcggcgctgggcagcctgaccgccgcggccggcgcggagatcgccgtcggtctctacgaacgctgggccgcccggcgcctgggggtttgcgagctgcccgaggaacagtcgggcgaccgtggcccgcattga	MGNEPQTLTEMPLWVLILLAALGGVSGEMWRADKAGLGGWALLRRLALRSGASIVCGVAVMLLALACGAALLFAAALGSLTAAAGAEIAVGLYERWAARRLGVCELPEEQSGDRGPH
ORF07	Collar PA0615; bacteriocin, pyocin	3084	3599	+	atgcctgaacaggctgttacgctcgaggctctgtacgcggccatcgagcaggtactgcgtgagcgtctgccggaggcgcagttgatcggcttctggccaggcgtgccggaaaataccccggcggtttccctggaaatggccgagctgctgcccgagcgcgatcccggtaccggcgagagcgccctgctgtgccgcctgcaggcgcggataatggtgccgcctggtgccgatcgccaggcggtatccattgcttgcggaatcgttcggacattgcgcgagcagacctggaacctgtctctggaaccggcgcgcttcgtacgctcggccgtcgacggcagtcgcgaggagctgaagagcctgcgtgtctggctggtcgagtggacgcagtcgctgcgtctc…	MPEQAVTLEALYAAIEQVLRERLPEAQLIGFWPGVPENTPAVSLEMAELLPERDPGTGESALLCRLQARIMVPPGADRQAVSIACGIVRTLREQTWNLSLEPARFVRSAVDGSREELKSLRVWLVEWTQSLRLGDPEWAWEDQPPGSLMLGFDPQTGPGHEPDYFAPEALA
ORF08	pyocin R2_PP, baseplate assembly protein V	3596	4153	+	atgagctatgtcagtgcggagcatgaccgcatgctcgccgcgatgatcctgccctgtgtggtggtcgccgtggacctggcagcggcgcgggtacgggtgcgctccggcgactggaccagcggctggctgcgctggcactccctggcagccggcaaggttcgccactggcgtgcgccgagcataggcgaacagggggtactgctcagtccgtcgggcggagtgtcaatgggtacctttattcccggtctgtacggcgatgcgggcacggcgccggacaacagcgccagcagtgagacctggcgtttcgacgacggcgcctcgttgagttacgactgggctgcgcatcgctaccgcgtcgagctgcccagcggcaccgtggaagtgagggtcggcgccagc…	MSYVSAEHDRMLAAMILPCVVVAVDLAAARVRVRSGDWTSGWLRWHSLAAGKVRHWRAPSIGEQGVLLSPSGGVSMGTFIPGLYGDAGTAPDNSASSETWRFDDGASLSYDWAAHRYRVELPSGTVEVRVGASEVRVSDGAVSLKAPKISLEGPVEIAGTLTVSGDILGGGSIIDTAGNSNHHTH
ORF09	pyocin R2_PP, baseplate assembly protein W	4306	4632	+	atgatcgggatggatcgccgtagcgggctgcccctgtccggcctggctcatcttaaacagtccgtcgaggacatcctgaccaccccgttgggcagcaggcgcatgcgccccgagtacggcagcaagctgcggcggatggtcgacatgccggtgagcgaaggctggaaaagcgccgtgcaggccgaggtagcccgttccctggggcgctgggaaccgcgcatcgcattgtctgccgtgcgagtcgtcgcagtcgtcgatggccgcgtggatctgctcctgagcggcgtgttcgagggcgagaacatcaatatggaggtctcggcgtga	MIGMDRRSGLPLSGLAHLKQSVEDILTTPLGSRRMRPEYGSKLRRMVDMPVSEGWKSAVQAEVARSLGRWEPRIALSAVRVVAVVDGRVDLLLSGVFEGENINMEVSA
ORF10	pyocin R2_PP, baseplate assembly protein J	4629	5516	+	gtgatcatcgatctttcccagttgccggagccagaggttatcgaaaacctcgatttcgagacgatttaccaggagctgttgggtgacttccgcgaagccatggctggcgaatggacagcggaggtggagtccgatccggttctcaagcttctgcaactggcggcctatcgagaactgctgctgcgggcgcggatcaacgatgcggcgcgggcggtgatgctggcatacgccagcggtgccgatctcgaccagatcggtgccggcttcaatgtgcagcgtttgctgatcaggcccgctcagcccgaggcggtaccgccggtggaggcgcaatacgagagcgacaagtcgctgcgcaatcgcatccagctcgcgttcgagcagctatccgtcgcaggaccg…	MIIDLSQLPEPEVIENLDFETIYQELLGDFREAMAGEWTAEVESDPVLKLLQLAAYRELLLRARINDAARAVMLAYASGADLDQIGAGFNVQRLLIRPAQPEAVPPVEAQYESDKSLRNRIQLAFEQLSVAGPRNAYIAHALGADGRVADASATSPAPCEVLISVLGVEGNGQAPEAVLQAVRLALNAEDVRPVADRVTVRSAGIVPYQVKAQLYLFPGPEAELIRAAAEASLRDYISAQRRLGRDIRRSALFATLHVEGVQRVELQEPAADVVLDETQAAYCTGYAITLGGVDE
ORF11	pyocin R2_PP, tail formation protein I	5509	6042	+	atgagtagccgactgctgccgccaaacaggagttcactggaacgctctctgggtgatgtattgcctgccgaactgccggtgccgcttcgtgagcttaacgatccggcacgctgtgaggcggccttgttgccctacctggcctggacgcgctcggtggaccgctgggacccggactggagcgacgaggccaagcgcaatgcggtagcgacgtccttcgtcctgcaccagcgcaaaggcacgctgaccgcgttgcgccaagtggtcgagccgatcggtgcgctgagcgaggtcaccgaatggtggcagcgaagcccgaccggcgtgccggggaccttcgagatcaccgtggacgtcagcgaccgtggcatcgacgaaggcaccgtactggagctggagcgc…	MSSRLLPPNRSSLERSLGDVLPAELPVPLRELNDPARCEAALLPYLAWTRSVDRWDPDWSDEAKRNAVATSFVLHQRKGTLTALRQVVEPIGALSEVTEWWQRSPTGVPGTFEITVDVSDRGIDEGTVLELERLLDDVRPVSRHLTRLDLRITPVIRSRHGLAVTDGDTLEIFPWKQ
ORF12	Tail fiber protein H, putative	6044	8152	+	atgacgaccaatactccgaaatacggtggcctgctcaccgacataggtgccgctgcgctggctgcggccagcgcagcaggcaagaaatggcagccgactcatatgctgatcggcgatgctggcggcgcaccgggtgctactccggatccgatacccgcagccacgcagacgaaactgatcaaccagcgctaccgggcgcagctcaatcgcttgttcgtgtcggacaagaacatcaatactctggttgccgaggtggtgctaccagttgaggtaggtggcttctggatccgcgagatcggcctgcaggatgccgacggcaagttcgtcgcggtatccaactgcccgcccagctacaaggcagcaatggaaagtggcagtgcgcggacccagaccattcgg…	MTTNTPKYGGLLTDIGAAALAAASAAGKKWQPTHMLIGDAGGAPGATPDPIPAATQTKLINQRYRAQLNRLFVSDKNINTLVAEVVLPVEVGGFWIREIGLQDADGKFVAVSNCPPSYKAAMESGSARTQTIRVNIALSGLENVQLLIDNGIIYATQDWVKEKVAADFKGRKILAGNGLVGGGDLSADRSIGLAPSGVTAGSYRSVTVNANGVVTQGSNPSTLAGYAIGDAYTKADTDGKLAQKANKATTLAGYGITDALRVDGNAVSSSRLAAPRSLAASGDASWSVTFDGSGNVSAPLSLSATGVAAGSYPKVTVDTKGRVTAGMALAATDIPGLDASKLVSGVLAEQRLPVFARGLATAVSTTSDPNTATVPLMLTNHANGPVAGRYFYIQSMFYP…
ORF13	Tail fiber assembly protein	8161	8601	+	atgatttttttccatgccgccactggcggtttctattcgaaggatgtccacggcgaccgcatgcccatcgacgcgcggatgtatcccctcgaggaagctgaatacctggcgctgttggtagcccagagcgagggcaagcagatcgtcgccgacgccgccggccgtccgttctgtatcgacccgccggccccggcagaagaggtcctggcccaccgtgagcgcatctggcgcgatcgccagttgacgcttactgatggccccatcgcccgtcaccgggatgagctcgacctgggcaagattacgaccctgaaccaggcgcaactgctcgaactcacgctgtaccgcgccagccttcgagactggccggcatccgcggcgtttcctgatttaggcgcaaga…	MIFFHAATGGFYSKDVHGDRMPIDARMYPLEEAEYLALLVAQSEGKQIVADAAGRPFCIDPPAPAEEVLAHRERIWRDRQLTLTDGPIARHRDELDLGKITTLNQAQLLELTLYRASLRDWPASAAFPDLGARPEPPLWLEPLITP
ORF14	pyocin R2_PP, tail sheath protein	8644	9804	+	atgagtttcttccacggcgttacggtaaccaacgtcgatatcggtgcgcgcaccatcgcgctgccggccagctccgtcatcggcctctgcgatgtgttcacgccgggggcgcaggcaagcgccaagcccaacgttccggtgctgctcaccagcaagaaggacgccgccgcggcgttcggcatcggctcgtcgatctatctggcctgcgaggccatctataaccgtgcccaggccgtgatcgtggcggtgggcgtggaagccgcggagactcccgaggcccaggccagcgccgtcataggtggtgtcagcgccgccggcgagcgcaccggactgcaggctctgctagacggcaagagccgcttcaatgctcagccgcgtctactagttgcgccgggtcat…	MSFFHGVTVTNVDIGARTIALPASSVIGLCDVFTPGAQASAKPNVPVLLTSKKDAAAAFGIGSSIYLACEAIYNRAQAVIVAVGVEAAETPEAQASAVIGGVSAAGERTGLQALLDGKSRFNAQPRLLVAPGHSAQQAVATAMDGLAEKLRAIAILDGPNSTDEAAVAYAKNFGSKRLFMVDPGVQVWDSATNAARNAPASAYAAGLFAWTDAEYGFWSSPSNKEIKGITGTSRPVEFLDGDETCRANLLNNANIATIIRDDGYRLWGNRTLSSDSKWAFVTRVRTMDLVMDAILAGHKWAVDRGITKTYVKDVTEGLRAFMRDLKNQGAVINFEVYADPDLNSASQLAQGKVYWNIRFTDVPPAENPNFRVEVTDQWLTEVLDVA
ORF15	Major tail tube protein	9817	10320	+	atgattccgcaaaccctgaccaataccaacctgttcatcgacggcgtgagcttcgccggtgacgtgccatccctgaccctgcccaagctggctgtgaagaccgagcaataccgtgccggcggcatggatgcgccggtatccatcgacatgggcctggaggcgatggaggccaagttctccaccaacggtgcccgccgagaagcactgaatttcttcggcctggccgaccagagcgctttcaatggcgtgttccgcggctccttcaagggccagaagggcgccagcgtgccagtggtggctaccctgcgcggcctgctcaaggaggtcgacccgggcgactggaaggccggcgagaaagccgagttcaagtacgccgttgcggtcagctactacaagctg…	MIPQTLTNTNLFIDGVSFAGDVPSLTLPKLAVKTEQYRAGGMDAPVSIDMGLEAMEAKFSTNGARREALNFFGLADQSAFNGVFRGSFKGQKGASVPVVATLRGLLKEVDPGDWKAGEKAEFKYAVAVSYYKLEVDGREVYEIDPVNGVRAINGVDQLAGMRNDLGL
ORF16	Phage tail assembly protein	10335	10679	+	atgacccaagagaatcgactgccgggctggctgacgctggatgccgacgccgccctcgttcgtctctcgcgtccggcacagtgcaacggggtcagcgtcgacacgctgaccctgcgtgcacccaccgtgcgtgatatccgcctggccggcaaggtggccggcgacgatgccgaggagcgcgaactgcaactgttcgcctcgctggcgcaggtcagccgccaggacctggaggggctgaagctgagcgactaccagcggctgcaaggcgcctactttcgcctggtgcaagacgacacggacgacaccttcgcgtatgcgtcaactggcgaggcgcctggccattga	MTQENRLPGWLTLDADAALVRLSRPAQCNGVSVDTLTLRAPTVRDIRLAGKVAGDDAEERELQLFASLAQVSRQDLEGLKLSDYQRLQGAYFRLVQDDTDDTFAYASTGEAPGH
ORF17	Phage tail tape measure protein	10849	13086	+	atgagtaaagacatggacctggtggtctccatcggcggcatcgccgacccctccttgggcaaggcattcgagaccgtcaaggcacggctcgacagtctccaggaacgttcccgccaggcgtccagcctgagggatgtgctgggagacgccatacgcctggagcgagaactcgccgatatgcgcaaggtcgggcaccgcggcgttgctgagcatgcccggcagcttggcgaacgccaggagcaactgaagcgactcggcatcgaggccagggccgcgggcgatgcctacgctcgactgggcgagatacagcgtggcctggatatgcaggtccgcggcctgcaacggctggagcaggccagccaggcaatgccattggctagcgcattttccggactggtc…	MSKDMDLVVSIGGIADPSLGKAFETVKARLDSLQERSRQASSLRDVLGDAIRLERELADMRKVGHRGVAEHARQLGERQEQLKRLGIEARAAGDAYARLGEIQRGLDMQVRGLQRLEQASQAMPLASAFSGLVVEASKTAAGYQARLRDLAIRNGLDAGREPALASLIQDSASQSGLGRTATLDMLEHLNATGMGFAAAQMNLGLAGRFGFGQGIASAEAAGLVRALQLAQGSDSPEQLSASLDRLVVLGKGRVGSEALARRLPALLSALGNAGEATAGDVGALGALLEIQAKNTTPDKADVRMKAWLEFVSSGSLKRAYGQNYDRDLEALRKDGASLLEANLELAARYRDKGGKLSAGAASPALEAYRASRGEFQGLLETQQSSVGSSERDAQRRKGM…
ORF18	pyocin R2_PP, tail formation protein U	13096	13968	+	atggcatatctggaacaattgcaggccggcctgaggtacctgggtcgcgccggcgagtccggacgcaagagtctggacaaggtggtcgctccggtgaacggcgcgatcagcgagatccgcggcgcagccgcggagctggagaacctgcccggcgtatcgccggaaatggctgcccggctgcagcgtgccatgcgcggcatcggccaggcgcagggcaaggtgaaccgcgtggtctccacctatgaccgggcgagccgggcgttgcttggtatcgacgaacgcctggatgcgctgaaggtccaggtgaacagtgccgcgcaggcggtcggcaaggtcgctggcgacatcagtccgacgctggcgggggtgctgccgtcgtggctgctggcaccctcggcg…	MAYLEQLQAGLRYLGRAGESGRKSLDKVVAPVNGAISEIRGAAAELENLPGVSPEMAARLQRAMRGIGQAQGKVNRVVSTYDRASRALLGIDERLDALKVQVNSAAQAVGKVAGDISPTLAGVLPSWLLAPSATPPSEAAAPLPHLLVLQPLTANAQPFYFNLNTAAFDALQRNSAYNWSGQVRLGRRPALQSVGMGEESILLKGAVFPLRRQVGNQEKVVGLEQLEALRRLAERREPLILSSGYGEVQMGLWCLVRISENQSALLGNGAPRKQTFDLEFKRYGDDLPNR
ORF19	pyocin R2_PP, tail protein X	13943	14149	+	atggcgacgacctgccgaaccgctgacggcgacatgctggacagcctctgctaccacgtctatggccatctgttgggctgcgtcgaggcgaccctcgacgccaatcccgggctggccgatgagcagcagccattccgcgccggcttgctgatcagtttccctgacatgccggtggtcaatgtcgaacaggtgcgcctgtgggattga	MATTCRTADGDMLDSLCYHVYGHLLGCVEATLDANPGLADEQQPFRAGLLISFPDMPVVNVEQVRLWD
ORF20	pyocin R2_PP, tail formation protein D	14207	15196	+	gtgcaaccgagtttccgtatcgttgccgacggcaccgacgtcacccagcggctgaatgaccgcctgctcaagctgaccttgctggacaagccgggcatggagtccgacagcctgatcttgaggctcgacgatcgcgatggacaggtggccttacccaggcgcggtgcggtgctggaggttcatctcggctatgccggcgagccactgatgcgcatgggacgctttaccgtggacaccttgcagtgggctggtccgccggactgcctgaccgttactgccaaggccggcgacatgcgcggcagtggcaagacgatacgcagcggcggttgggagggcactaccctggctcaggtctgccgcgatgttggcgcacgcaacggctggcgcgtggagtgtccg…	MQPSFRIVADGTDVTQRLNDRLLKLTLLDKPGMESDSLILRLDDRDGQVALPRRGAVLEVHLGYAGEPLMRMGRFTVDTLQWAGPPDCLTVTAKAGDMRGSGKTIRSGGWEGTTLAQVCRDVGARNGWRVECPLQVAIARVDQVNESDYHFVTRLARQYDCTAKLAEGMLMVLPRQSGQSATGRRIEPLVLGRADVGSFDVTFDDRSLMRTVKTRYQLPGSGEVKSVELKNPKAPATAMGEHVDRHLYASRGEAEQAAKARLASFSRSSASVRLELPGRGDLFAERSLLLQGFKAGIDGEFLIDSVEHTYSSSGWTTVVQCNGGRGGKG
ORF21	Glycoside hydrolase family 19	15229	15858	+	atgaaactgaccgagcagcaattgctgcgcatttttcccaacgcccgcctcgtcgcgggcgttttcgttgcggcgttgcaacgggccatggacgagagggagatcgacacaccggcgcggcgtgccgcgtttctcgcccaggtcggccacgaaagcagccagttgacccggctggtggagaacctcaactacagtgcccaaggcttggcggcgacctggccgagccgctatctcggccccgacgggcagcccaacgcgttggccttgcggctggcgcgcaatccgcaggcgattgccgacaacacctacgccacgcgcaacggcaatggcgacgaagcgtccggcgatggctggcgcttccgtgggcgtggcttgctacagatcaccgggcgtgccaac…	MKLTEQQLLRIFPNARLVAGVFVAALQRAMDEREIDTPARRAAFLAQVGHESSQLTRLVENLNYSAQGLAATWPSRYLGPDGQPNALALRLARNPQAIADNTYATRNGNGDEASGDGWRFRGRGLLQITGRANYRLVGEALGEPLEAEPWRLEQPVPAARSAAWWWAGHGLNELADRGEFAAITRRINGGLNGQAERLALWQRARAVLS
ORF22	Hypothetical protein	15855	16217	+	atgagccggctcgctctgctcctgccggccgtgttgctggtcctgctggccggcgccttgctcggcggcggcctggttgcccgccactatcgtccgcaactggaggaggccctgggccaactcactgccagccgcgtcgccagcggccagctcgaggctttgctcgatgagcagcagcgagcgctggcggcggtgcgggcgagcgccgagaggcgcgcgaaggacgtcgagcaggcactcggcgaggccagggcgcaggccgcggagcagtatgccgcggccgtgcgtctgctccgggaacccgacattggcacggactgccaggcggcaggtgcggcgatcgaccgggagctgggactatga	MSRLALLLPAVLLVLLAGALLGGGLVARHYRPQLEEALGQLTASRVASGQLEALLDEQQRALAAVRASAERRAKDVEQALGEARAQAAEQYAAAVRLLREPDIGTDCQAAGAAIDRELGL
ORF23	Lipoprotein	16214	16471	+	atgactcgtctcctgctggggctttgtctgcttttcgcgggctgcgcagcctcaccgacgacacctcgccccgtgcgcgtcgaggttcccctggcagtgccctgccgtgtacctgacgtgcgcccgccgagctgggccggcgccacgctgaaggccggcgattcgctgcaggccaaggttcgcgcattgctcgccgagcgccgccagcggcagggctacgaactcgaattgcaggcggcgttgcgtgcctgccgctaa	MTRLLLGLCLLFAGCAASPTTPRPVRVEVPLAVPCRVPDVRPPSWAGATLKAGDSLQAKVRALLAERRQRQGYELELQAALRACR
Sequences and annotation of the pyocin cluster 1-13_pyoR5. Start, stop and the strand for each gene are also shown.

## Sheet: 2-29_pyoR5
Position	Protein function	Start	Stop	Strand	Nucleotide sequence	Amino acid (AA) sequence
ORF01	Pyocin activator protein PrtN	315	1	-	gtgcagccaaccatcgcccctaccactccaattccacgccaggaaaccgtggaattggtctaccgcatcttcggcgacgtcctggtgccgctggagcaggtccgcgaacgctggtttcgcaacctgaacaaggaaaacttcagcaaggccctggcatgcgggcggatcgccctgccagtgacgaccctcgacgatagccacaaggccatgcagttcgtggccctcgatcacctcgccgcctacgtcgaccagcgcgcgaaccaagccggaagcgcccgtcgagcacagccaggcgcggacagcatcgcatcctga	MQPTIAPTTPIPRQETVELVYRIFGDVLVPLEQVRERWFRNLNKENFSKALACGRIALPVTTLDDSHKAMQFVALDHLAAYVDQRANQAGSARRAQPGADSIAS
ORF02	HTH-type transcriptional regulator PrtR	1185	415	-	atggacaagagcacccagatcccgcccgacagcttcgccgctcgcctcaagcaggccatggcgatgcgcaacctgaagcaggaaaccctcgccgaagcggcaggggtttcgcagaacaccattcacaagctgacctcgggcaaggcccagagcacccgcaagctgatcgagatcgcggcggccctgggcgtttcgccggtctggctgcagaccggcgaaggcactccagccgcgcgcagtgccgtgtccgtggccgatggcagcccattggtgctggaaccgctgcatccgtgggacagcgacacaccgctggacgaagacgaagtggaactgccgctgtacaaggaagtggagatgtccgccggcgccggacgcactgcggtacgcgagatagagggg…	MDKSTQIPPDSFAARLKQAMAMRNLKQETLAEAAGVSQNTIHKLTSGKAQSTRKLIEIAAALGVSPVWLQTGEGTPAARSAVSVADGSPLVLEPLHPWDSDTPLDEDEVELPLYKEVEMSAGAGRTAVREIEGRKLRFSYATLRASGVDPSAAICAQLTGNSMEPLIMDGSTIGVDTATTHITDGEIYALEHDGMLRVKFVYRLPGGGIRLRSFNREEYPDEEYSPEDMRSRQISMIGWVFWWSTVRHRRAPSLVR
ORF03	Hypothetical protein	1440	1270	-	atggacggcgctccggccctccagatgccggagcgctttcccgtggccccggcacccaagcagtcggcacctgcatcgtcggtcgccgacaaccgggtgtgtccctgcacccatgtgaaatctctgaaaggcgggtgggaagttgtggaactcaccccttccgctttctga	MDGAPALQMPERFPVAPAPKQSAPASSVADNRVCPCTHVKSLKGGWEVVELTPSAF
ORF04	Repressor, PtrB	1643	1843	+	atggctgaccttgccgatcacgccaacgaactggtcctggctcgcctcgacggcctcctggcggcgcgcccggcgctggccatccgcgagtccgcggaagactgcgaggactgcggcgagcccattccccaggcgcgccgtcgggcggcaccgggttgcagtcgctgcatcgactgccaggaccgccacgagcgccgttga	MADLADHANELVLARLDGLLAARPALAIRESAEDCEDCGEPIPQARRRAAPGCSRCIDCQDRHERR
ORF05	Antiterminator Q protein; RNA polymerase	1891	2250	+	gtgatcaaagccatcgatgaaatgctcaagctctgggccgaggaaatgcacgcgccaggcagcaacggaggcggctacgccggcggcaacctgatcgccatgctgatcgccagcaagggcgaggtggtccgcggccaccgtggcagccgggtgatcctcgaccgtgtggcggaggtcgatcgcctggtaaatcgcctacccgaggaactgaagaccgtggtggtggagcactatctcaatcgcgacagcttccccgagcagaagtaccgtcactgcggttgcagccgcaacaccttctatctgcgcctgcatgtggcgcaccagggtatccaggacggcctgctgcgacgggcggcctga	MIKAIDEMLKLWAEEMHAPGSNGGGYAGGNLIAMLIASKGEVVRGHRGSRVILDRVAEVDRLVNRLPEELKTVVVEHYLNRDSFPEQKYRHCGCSRNTFYLRLHVAHQGIQDGLLRRAA
ORF06	Pyocin R2, holin	2709	3062	+	atgggcaacgaaccgcagacactgacggaaatgccgctctgggtactgatcctgctcgccgcgctgggcggcgtcagcggcgagatgtggcgtgccgacaaggccggtctcggcggctgggccttgttgcggcgcctggcgctgcgctccggcgcgtcgatcgtctgcggcgtggcggtgatgctgctggcgttggcttgcggcgccgcgctgctgttcgccgcggcgctgggcagcctgaccgccgcggccggcgcggagatcgccgtcggtctctacgaacgctgggccgcccggcgcctgggggtttgcgagctgcccgaggaacagtcgggcgaccgtggcccgcattga	MGNEPQTLTEMPLWVLILLAALGGVSGEMWRADKAGLGGWALLRRLALRSGASIVCGVAVMLLALACGAALLFAAALGSLTAAAGAEIAVGLYERWAARRLGVCELPEEQSGDRGPH
ORF07	Collar PA0615; bacteriocin, pyocin	3084	3599	+	atgcctgaacaggctgttacgctcgaggctctgtacgcggccatcgagcaggtactgcgtgagcgtctgccggaggcgcagttgatcggcttctggccaggcgtgccggaaaataccccggcggtttccctggaaatggccgagctgctgcccgagcgcgatcccggtaccggcgagagcgccctgctgtgccgcctgcaggcgcggataatggtgccgcctggtgccgatcgccaggcggtatccattgcttgcggaatcgttcggacattgcgcgagcagacctggaacctgtctctggaaccggcgcgcttcgtacgctcggccgtcgacggcagtcgcgaggagctgaagagcctgcgtgtctggctggtcgagtggacgcagtcgctgcgtctc…	MPEQAVTLEALYAAIEQVLRERLPEAQLIGFWPGVPENTPAVSLEMAELLPERDPGTGESALLCRLQARIMVPPGADRQAVSIACGIVRTLREQTWNLSLEPARFVRSAVDGSREELKSLRVWLVEWTQSLRLGDPEWAWEDQPPGSLMLGFDPQTGPGHEPDYFAPEALA
ORF08	pyocin R2_PP, baseplate assembly protein V	3596	4153	+	atgagctatgtcagtgcggagcatgaccgcatgctcgccgcgatgatcctgccctgtgtggtggtcgccgtggacctggcagcggcgcgggtacgggtgcgctccggcgactggaccagcggctggctgcgctggcactccctggcagccggcaaggttcgccactggcgtgcgccgagcataggcgaacagggggtactgctcagtccgtcgggcggagtgtcaatgggtacctttattcccggtctgtacggcgatgcgggcacggcgccggacaacagcgccagcagtgagacctggcgtttcgacgacggcgcctcgttgagttacgactgggctgcgcatcgctaccgcgtcgagctgcccagcggcaccgtggaagtgagggtcggcgccagc…	MSYVSAEHDRMLAAMILPCVVVAVDLAAARVRVRSGDWTSGWLRWHSLAAGKVRHWRAPSIGEQGVLLSPSGGVSMGTFIPGLYGDAGTAPDNSASSETWRFDDGASLSYDWAAHRYRVELPSGTVEVRVGASEVRVSDGAVSLKAPKISLEGPVEIAGTLTVSGDILGGGSIIDTAGNSNHHTH
ORF09	pyocin R2_PP, baseplate assembly protein W	4306	4632	+	atgatcgggatggatcgccgtagcgggctgcccctgtccggcctggctcatcttaaacagtccgtcgaggacatcctgaccaccccgttgggcagcaggcgcatgcgccccgagtacggcagcaagctgcggcggatggtcgacatgccggtgagcgaaggctggaaaagcgccgtgcaggccgaggtagcccgttccctggggcgctgggaaccgcgcatcgcattgtctgccgtgcgagtcgtcgcagtcgtcgatggccgcgtggatctgctcctgagcggcgtgttcgagggcgagaacatcaatatggaggtctcggcgtga	MIGMDRRSGLPLSGLAHLKQSVEDILTTPLGSRRMRPEYGSKLRRMVDMPVSEGWKSAVQAEVARSLGRWEPRIALSAVRVVAVVDGRVDLLLSGVFEGENINMEVSA
ORF10	pyocin R2_PP, baseplate assembly protein J	4629	5516	+	gtgatcatcgatctttcccagttgccggagccagaggttatcgaaaacctcgatttcgagacgatttaccaggagctgttgggtgacttccgcgaagccatggctggcgaatggacagcggaggtggagtccgatccggttctcaagcttctgcaactggcggcctatcgagaactgctgctgcgggcgcggatcaacgatgcggcgcgggcggtgatgctggcatacgccagcggtgccgatctcgaccagatcggtgccggcttcaatgtgcagcgtttgctgatcaggcccgctcagcccgaggcggtaccgccggtggaggcgcaatacgagagcgacaagtcgctgcgcaatcgcatccagctcgcgttcgagcagctatccgtcgcaggaccg…	MIIDLSQLPEPEVIENLDFETIYQELLGDFREAMAGEWTAEVESDPVLKLLQLAAYRELLLRARINDAARAVMLAYASGADLDQIGAGFNVQRLLIRPAQPEAVPPVEAQYESDKSLRNRIQLAFEQLSVAGPRNAYIAHALGADGRVADASATSPAPCEVLISVLGVEGNGQAPEAVLQAVRLALNAEDVRPVADRVTVRSAGIVPYQVKAQLYLFPGPEAELIRAAAEASLRDYISAQRRLGRDIRRSALFATLHVEGVQRVELQEPAADVVLDETQAAYCTGYAITLGGVDE
ORF11	pyocin R2_PP, tail formation protein I	5509	6042	+	atgagtagccgactgctgccgccaaacaggagttcactggaacgctctctgggtgatgtattgcctgccgaactgccggtgccgcttcgtgagcttaacgatccggcacgctgtgaggcggccttgttgccctacctggcctggacgcgctcggtggaccgctgggacccggactggagcgacgaggccaagcgcaatgcggtagcgacgtccttcgtcctgcaccagcgcaaaggcacgctgaccgcgttgcgccaagtggtcgagccgatcggtgcgctgagcgaggtcaccgaatggtggcagcgaagcccgaccggcgtgccggggaccttcgagatcaccgtggacgtcagcgaccgtggcatcgacgaaggcaccgtactggagctggagcgc…	MSSRLLPPNRSSLERSLGDVLPAELPVPLRELNDPARCEAALLPYLAWTRSVDRWDPDWSDEAKRNAVATSFVLHQRKGTLTALRQVVEPIGALSEVTEWWQRSPTGVPGTFEITVDVSDRGIDEGTVLELERLLDDVRPVSRHLTRLDLRITPVIRSRHGLAVTDGDTLEIFPWKQ
ORF12	Tail fiber protein H, putative	6044	8152	+	atgacgaccaatactccgaaatacggtggcctgctcaccgacataggtgccgctgcgctggctgcggccagcgcagcaggcaagaaatggcagccgactcatatgctgatcggcgatgctggcggcgcaccgggtgctactccggatccgatacccgcagccacgcagacgaaactgatcaaccagcgctaccgggcgcagctcaatcgcttgttcgtgtcggacaagaacatcaatactctggttgccgaggtggtgctaccagttgaggtaggtggcttctggatccgcgagatcggcctgcaggatgccgacggcaagttcgtcgcggtatccaactgcccgcccagctacaaggcagcaatggaaagtggcagtgcgcggacccagaccattcgg…	MTTNTPKYGGLLTDIGAAALAAASAAGKKWQPTHMLIGDAGGAPGATPDPIPAATQTKLINQRYRAQLNRLFVSDKNINTLVAEVVLPVEVGGFWIREIGLQDADGKFVAVSNCPPSYKAAMESGSARTQTIRVNIALSGLENVQLLIDNGIIYATQDWVKEKVAADFKGRKILAGNGLVGGGDLSADRSIGLAPSGVTAGSYRSVTVNANGVVTQGSNPSTLAGYAIGDAYTKADTDGKLAQKANKATTLAGYGITDALRVDGNAVSSSRLAAPRSLAASGDASWSVTFDGSGNVSAPLSLSATGVAAGSYPKVTVDTKGRVTAGMALAATDIPGLDASKLVSGVLAEQRLPVFARGLATAVSTTSDPNTATVPLMLTNHANGPVAGRYFYIQSMFYP…
ORF13	Tail fiber assembly protein	8161	8601	+	atgatttttttccatgccgccactggcggtttctattcgaaggatgtccacggcgaccgcatgcccatcgacgcgcggatgtatcccctcgaggaagctgaatacctggcgctgttggtagcccagagcgagggcaagcagatcgtcgccgacgccgccggccgtccgttctgtatcgacccgccggccccggcagaagaggtcctggcccaccgtgagcgcatctggcgcgatcgccagttgacgcttactgatggccccatcgcccgtcaccgggatgagctcgacctgggcaagattacgaccctgaaccaggcgcaactgctcgaactcacgctgtaccgcgccagccttcgagactggccggcatccgcggcgtttcctgatttaggcgcaaga…	MIFFHAATGGFYSKDVHGDRMPIDARMYPLEEAEYLALLVAQSEGKQIVADAAGRPFCIDPPAPAEEVLAHRERIWRDRQLTLTDGPIARHRDELDLGKITTLNQAQLLELTLYRASLRDWPASAAFPDLGARPEPPLWLEPLITP
ORF14	pyocin R2_PP, tail sheath protein	8644	9804	+	atgagtttcttccacggcgttacggtaaccaacgtcgatatcggtgcgcgcaccatcgcgctgccggccagctccgtcatcggcctctgcgatgtgttcacgccgggggcgcaggcaagcgccaagcccaacgttccggtgctgctcaccagcaagaaggacgccgccgcggcgttcggcatcggctcgtcgatctatctggcctgcgaggccatctataaccgtgcccaggccgtgatcgtggcggtgggcgtggaagccgcggagactcccgaggcccaggccagcgccgtcataggtggtgtcagcgccgccggcgagcgcaccggactgcaggctctgctagacggcaagagccgcttcaatgctcagccgcgtctactagttgcgccgggtcat…	MSFFHGVTVTNVDIGARTIALPASSVIGLCDVFTPGAQASAKPNVPVLLTSKKDAAAAFGIGSSIYLACEAIYNRAQAVIVAVGVEAAETPEAQASAVIGGVSAAGERTGLQALLDGKSRFNAQPRLLVAPGHSAQQAVATAMDGLAEKLRAIAILDGPNSTDEAAVAYAKNFGSKRLFMVDPGVQVWDSATNAARNAPASAYAAGLFAWTDAEYGFWSSPSNKEIKGITGTSRPVEFLDGDETCRANLLNNANIATIIRDDGYRLWGNRTLSSDSKWAFVTRVRTMDLVMDAILAGHKWAVDRGITKTYVKDVTEGLRAFMRDLKNQGAVINFEVYADPDLNSASQLAQGKVYWNIRFTDVPPAENPNFRVEVTDQWLTEVLDVA
ORF15	Major tail tube protein	9817	10320	+	atgattccgcaaaccctgaccaataccaacctgttcatcgacggcgtgagcttcgccggtgacgtgccatccctgaccctgcccaagctggctgtgaagaccgagcaataccgtgccggcggcatggatgcgccggtatccatcgacatgggcctggaggcgatggaggccaagttctccaccaacggtgcccgccgagaagcactgaatttcttcggcctggccgaccagagcgctttcaatggcgtgttccgcggctccttcaagggccagaagggcgccagcgtgccagtggtggctaccctgcgcggcctgctcaaggaggtcgacccgggcgactggaaggccggcgagaaagccgagttcaagtacgccgttgcggtcagctactacaagctg…	MIPQTLTNTNLFIDGVSFAGDVPSLTLPKLAVKTEQYRAGGMDAPVSIDMGLEAMEAKFSTNGARREALNFFGLADQSAFNGVFRGSFKGQKGASVPVVATLRGLLKEVDPGDWKAGEKAEFKYAVAVSYYKLEVDGREVYEIDPVNGVRAINGVDQLAGMRNDLGL
ORF16	Phage tail assembly protein	10335	10679	+	atgacccaagagaatcgactgccgggctggctgacgctggatgccgacgccgccctcgttcgtctctcgcgtccggcacagtgcaacggggtcagcgtcgacacgctgaccctgcgtgcacccaccgtgcgtgatatccgcctggccggcaaggtggccggcgacgatgccgaggagcgcgaactgcaactgttcgcctcgctggcgcaggtcagccgccaggacctggaggggctgaagctgagcgactaccagcggctgcaaggcgcctactttcgcctggtgcaagacgacacggacgacaccttcgcgtatgcgtcaactggcgaggcgcctggccattga	MTQENRLPGWLTLDADAALVRLSRPAQCNGVSVDTLTLRAPTVRDIRLAGKVAGDDAEERELQLFASLAQVSRQDLEGLKLSDYQRLQGAYFRLVQDDTDDTFAYASTGEAPGH
ORF17	Phage tail tape measure protein	10849	13086	+	atgagtaaagacatggacctggtggtctccatcggcggcatcgccgacccctccttgggcaaggcattcgagaccgtcaaggcacggctcgacagtctccaggaacgttcccgccaggcgtccagcctgagggatgtgctgggagacgccatacgcctggagcgagaactcgccgatatgcgcaaggtcgggcaccgcggcgttgctgagcatgcccggcagcttggcgaacgccaggagcaactgaagcgactcggcatcgaggccagggccgcgggcgatgcctacgctcgactgggcgagatacagcgtggcctggatatgcaggtccgcggcctgcaacggctggagcaggccagccaggcaatgccattggctagcgcattttccggactggtc…	MSKDMDLVVSIGGIADPSLGKAFETVKARLDSLQERSRQASSLRDVLGDAIRLERELADMRKVGHRGVAEHARQLGERQEQLKRLGIEARAAGDAYARLGEIQRGLDMQVRGLQRLEQASQAMPLASAFSGLVVEASKTAAGYQARLRDLAIRNGLDAGREPALASLIQDSASQSGLGRTATLDMLEHLNATGMGFAAAQMNLGLAGRFGFGQGIASAEAAGLVRALQLAQGSDSPEQLSASLDRLVVLGKGRVGSEALARRLPALLSALGNAGEATAGDVGALGALLEIQAKNTTPDKADVRMKAWLEFVSSGSLKRAYGQNYDRDLEALRKDGASLLEANLELAARYRDKGGKLSAGAASPALEAYRASRGEFQGLLETQQSSVGSSERDAQRRKGM…
ORF18	pyocin R2_PP, tail formation protein U	13096	13968	+	atggcatatctggaacaattgcaggccggcctgaggtacctgggtcgcgccggcgagtccggacgcaagagtctggacaaggtggtcgctccggtgaacggcgcgatcagcgagatccgcggcgcagccgcggagctggagaacctgcccggcgtatcgccggaaatggctgcccggctgcagcgtgccatgcgcggcatcggccaggcgcagggcaaggtgaaccgcgtggtctccacctatgaccgggcgagccgggcgttgcttggtatcgacgaacgcctggatgcgctgaaggtccaggtgaacagtgccgcgcaggcggtcggcaaggtcgctggcgacatcagtccgacgctggcgggggtgctgccgtcgtggctgctggcaccctcggcg…	MAYLEQLQAGLRYLGRAGESGRKSLDKVVAPVNGAISEIRGAAAELENLPGVSPEMAARLQRAMRGIGQAQGKVNRVVSTYDRASRALLGIDERLDALKVQVNSAAQAVGKVAGDISPTLAGVLPSWLLAPSATPPSEAAAPLPHLLVLQPLTANAQPFYFNLNTAAFDALQRNSAYNWSGQVRLGRRPALQSVGMGEESILLKGAVFPLRRQVGNQEKVVGLEQLEALRRLAERREPLILSSGYGEVQMGLWCLVRISENQSALLGNGAPRKQTFDLEFKRYGDDLPNR
ORF19	pyocin R2_PP, tail protein X	13943	14149	+	atggcgacgacctgccgaaccgctgacggcgacatgctggacagcctctgctaccacgtctatggccatctgttgggctgcgtcgaggcgaccctcgacgccaatcccgggctggccgatgagcagcagccattccgcgccggcttgctgatcagtttccctgacatgccggtggtcaatgtcgaacaggtgcgcctgtgggattga	MATTCRTADGDMLDSLCYHVYGHLLGCVEATLDANPGLADEQQPFRAGLLISFPDMPVVNVEQVRLWD
ORF20	pyocin R2_PP, tail formation protein D	14207	15196	+	gtgcaaccgagtttccgtatcgttgccgacggcaccgacgtcacccagcggctgaatgaccgcctgctcaagctgaccttgctggacaagccgggcatggagtccgacagcctgatcttgaggctcgacgatcgcgatggacaggtggccttacccaggcgcggtgcggtgctggaggttcatctcggctatgccggcgagccactgatgcgcatgggacgctttaccgtggacaccttgcagtgggctggtccgccggactgcctgaccgttactgccaaggccggcgacatgcgcggcagtggcaagacgatacgcagcggcggttgggagggcactaccctggctcaggtctgccgcgatgttggcgcacgcaacggctggcgcgtggagtgtccg…	MQPSFRIVADGTDVTQRLNDRLLKLTLLDKPGMESDSLILRLDDRDGQVALPRRGAVLEVHLGYAGEPLMRMGRFTVDTLQWAGPPDCLTVTAKAGDMRGSGKTIRSGGWEGTTLAQVCRDVGARNGWRVECPLQVAIARVDQVNESDYHFVTRLARQYDCTAKLAEGMLMVLPRQSGQSATGRRIEPLVLGRADVGSFDVTFDDRSLMRTVKTRYQLPGSGEVKSVELKNPKAPATAMGEHVDRHLYASRGEAEQAAKARLASFSRSSASVRLELPGRGDLFAERSLLLQGFKAGIDGEFLIDSVEHTYSSSGWTTVVQCNGGRGGKG
ORF21	Glycoside hydrolase family 19	15229	15858	+	atgaaactgaccgagcagcaattgctgcgcatttttcccaacgcccgcctcgtcgcgggcgttttcgttgcggcgttgcaacgggccatggacgagagggagatcgacacaccggcgcggcgtgccgcgtttctcgcccaggtcggccacgaaagcagccagttgacccggctggtggagaacctcaactacagtgcccaaggcttggcggcgacctggccgagccgctatctcggccccgacgggcagcccaacgcgttggccttgcggctggcgcgcaatccgcaggcgattgccgacaacacctacgccacgcgcaacggcaatggcgacgaagcgtccggcgatggctggcgcttccgtgggcgtggcttgctacagatcaccgggcgtgccaac…	MKLTEQQLLRIFPNARLVAGVFVAALQRAMDEREIDTPARRAAFLAQVGHESSQLTRLVENLNYSAQGLAATWPSRYLGPDGQPNALALRLARNPQAIADNTYATRNGNGDEASGDGWRFRGRGLLQITGRANYRLVGEALGEPLEAEPWRLEQPVPAARSAAWWWAGHGLNELADRGEFAAITRRINGGLNGQAERLALWQRARAVLS
ORF22	Hypothetical protein	15855	16217	+	atgagccggctcgctctgctcctgccggccgtgttgctggtcctgctggccggcgccttgctcggcggcggcctggttgcccgccactatcgtccgcaactggaggaggccctgggccaactcactgccagccgcgtcgccagcggccagctcgaggctttgctcgatgagcagcagcgagcgctggcggcggtgcgggcgagcgccgagaggcgcgcgaaggacgtcgagcaggcactcggcgaggccagggcgcaggccgcggagcagtatgccgcggccgtgcgtctgctccgggaacccgacattggcacggactgccaggcggcaggtgcggcgatcgaccgggagctgggactatga	MSRLALLLPAVLLVLLAGALLGGGLVARHYRPQLEEALGQLTASRVASGQLEALLDEQQRALAAVRASAERRAKDVEQALGEARAQAAEQYAAAVRLLREPDIGTDCQAAGAAIDRELGL
ORF23	Lipoprotein	16214	16471	+	atgactcgtctcctgctggggctttgtctgcttttcgcgggctgcgcagcctcaccgacgacacctcgccccgtgcgcgtcgaggttcccctggcagtgccctgccgtgtacctgacgtgcgcccgccgagctgggccggcgccacgctgaaggccggcgattcgctgcaggccaaggttcgcgcattgctcgccgagcgccgccagcggcagggctacgaactcgaattgcaggcggcgttgcgtgcctgccgctaa	MTRLLLGLCLLFAGCAASPTTPRPVRVEVPLAVPCRVPDVRPPSWAGATLKAGDSLQAKVRALLAERRQRQGYELELQAALRACR
Sequences and annotation of the pyocin cluster 2-29_pyoR5. Start, stop and the strand for each gene are also shown.

## Sheet: 3-49_pyoR5
Position	Protein function	Start	Stop	Strand	Nucleotide sequence	Amino acid (AA) sequence
ORF01	Pyocin activator protein PrtN	315	1	-	gtgcagccaaccatcgcccctaccactccaattccacgccaggaaaccgtggaattggtctaccgcatcttcggcgacgtcctggtgccgctggagcaggtccgcgaacgctggtttcgcaacctgaacaaggaaaacttcagcaaggccctggcatgcgggcggatcgccctgccagtgacgaccctcgacgatagccacaaggccatgcagttcgtggccctcgatcacctcgccgcctacgtcgaccagcgcgcgaaccaagccggaagcgcccgtcgagcacagccaggcgcggacagcatcgcatcctga	MQPTIAPTTPIPRQETVELVYRIFGDVLVPLEQVRERWFRNLNKENFSKALACGRIALPVTTLDDSHKAMQFVALDHLAAYVDQRANQAGSARRAQPGADSIAS
ORF02	HTH-type transcriptional regulator PrtR	1185	415	-	atggacaagagcacccagatcccgcccgacagcttcgccgctcgcctcaagcaggccatggcgatgcgcaacctgaagcaggaaaccctcgccgaagcggcaggggtttcgcagaacaccattcacaagctgacctcgggcaaggcccagagcacccgcaagctgatcgagatcgcggcggccctgggcgtttcgccggtctggctgcagaccggcgaaggcactccagccgcgcgcagtgccgtgtccgtggccgatggcagcccattggtgctggaaccgctgcatccgtgggacagcgacacaccgctggacgaagacgaagtggaactgccgctgtacaaggaagtggagatgtccgccggcgccggacgcactgcggtacgcgagatagagggg…	MDKSTQIPPDSFAARLKQAMAMRNLKQETLAEAAGVSQNTIHKLTSGKAQSTRKLIEIAAALGVSPVWLQTGEGTPAARSAVSVADGSPLVLEPLHPWDSDTPLDEDEVELPLYKEVEMSAGAGRTAVREIEGRKLRFSYATLRASGVDPSAAICAQLTGNSMEPLIMDGSTIGVDTATTHITDGEIYALEHDGMLRVKFVYRLPGGGIRLRSFNREEYPDEEYSPEDMRSRQISMIGWVFWWSTVRHRRAPSLVR
ORF03	Hypothetical protein	1440	1270	-	atggacggcgctccggccctccagatgccggagcgctttcccgtggccccggcacccaagcagtcggcacctgcatcgtcggtcgccgacaaccgggtgtgtccctgcacccatgtgaaatctctgaaaggcgggtgggaagttgtggaactcaccccttccgctttctga	MDGAPALQMPERFPVAPAPKQSAPASSVADNRVCPCTHVKSLKGGWEVVELTPSAF
ORF04	Repressor, PtrB	1643	1843	+	atggctgaccttgccgatcacgccaacgaactggtcctggctcgcctcgacggcctcctggcggcgcgcccggcgctggccatccgcgagtccgcggaagactgcgaggactgcggcgagcccattccccaggcgcgccgtcgggcggcaccgggttgcagtcgctgcatcgactgccaggaccgccacgagcgccgttga	MADLADHANELVLARLDGLLAARPALAIRESAEDCEDCGEPIPQARRRAAPGCSRCIDCQDRHERR
ORF05	Antiterminator Q protein; RNA polymerase	1891	2250	+	gtgatcaaagccatcgatgaaatgctcaagctctgggccgaggaaatgcacgcgccaggcagcaacggaggcggctacgccggcggcaacctgatcgccatgctgatcgccagcaagggcgaggtggtccgcggccaccgtggcagccgggtgatcctcgaccgtgtggcggaggtcgatcgcctggtaaatcgcctacccgaggaactgaagaccgtggtggtggagcactatctcaatcgcgacagcttccccgagcagaagtaccgtcactgcggttgcagccgcaacaccttctatctgcgcctgcatgtggcgcaccagggtatccaggacggcctgctgcgacgggcggcctga	MIKAIDEMLKLWAEEMHAPGSNGGGYAGGNLIAMLIASKGEVVRGHRGSRVILDRVAEVDRLVNRLPEELKTVVVEHYLNRDSFPEQKYRHCGCSRNTFYLRLHVAHQGIQDGLLRRAA
ORF06	Pyocin R2, holin	2709	3062	+	atgggcaacgaaccgcagacactgacggaaatgccgctctgggtactgatcctgctcgccgcgctgggcggcgtcagcggcgagatgtggcgtgccgacaaggccggtctcggcggctgggccttgttgcggcgcctggcgctgcgctccggcgcgtcgatcgtctgcggcgtggcggtgatgctgctggcgttggcttgcggcgccgcgctgctgttcgccgcggcgctgggcagcctgaccgccgcggccggcgcggagatcgccgtcggtctctacgaacgctgggccgcccggcgcctgggggtttgcgagctgcccgaggaacagtcgggcgaccgtggcccgcattga	MGNEPQTLTEMPLWVLILLAALGGVSGEMWRADKAGLGGWALLRRLALRSGASIVCGVAVMLLALACGAALLFAAALGSLTAAAGAEIAVGLYERWAARRLGVCELPEEQSGDRGPH
ORF07	Collar PA0615; bacteriocin, pyocin	3084	3599	+	atgcctgaacaggctgttacgctcgaggctctgtacgcggccatcgagcaggtactgcgtgagcgtctgccggaggcgcagttgatcggcttctggccaggcgtgccggaaaataccccggcggtttccctggaaatggccgagctgctgcccgagcgcgatcccggtaccggcgagagcgccctgctgtgccgcctgcaggcgcggataatggtgccgcctggtgccgatcgccaggcggtatccattgcttgcggaatcgttcggacattgcgcgagcagacctggaacctgtctctggaaccggcgcgcttcgtacgctcggccgtcgacggcagtcgcgaggagctgaagagcctgcgtgtctggctggtcgagtggacgcagtcgctgcgtctc…	MPEQAVTLEALYAAIEQVLRERLPEAQLIGFWPGVPENTPAVSLEMAELLPERDPGTGESALLCRLQARIMVPPGADRQAVSIACGIVRTLREQTWNLSLEPARFVRSAVDGSREELKSLRVWLVEWTQSLRLGDPEWAWEDQPPGSLMLGFDPQTGPGHEPDYFAPEALA
ORF08	pyocin R2_PP, baseplate assembly protein V	3596	4153	+	atgagctatgtcagtgcggagcatgaccgcatgctcgccgcgatgatcctgccctgtgtggtggtcgccgtggacctggcagcggcgcgggtacgggtgcgctccggcgactggaccagcggctggctgcgctggcactccctggcagccggcaaggttcgccactggcgtgcgccgagcataggcgaacagggggtactgctcagtccgtcgggcggagtgtcaatgggtacctttattcccggtctgtacggcgatgcgggcacggcgccggacaacagcgccagcagtgagacctggcgtttcgacgacggcgcctcgttgagttacgactgggctgcgcatcgctaccgcgtcgagctgcccagcggcaccgtggaagtgagggtcggcgccagc…	MSYVSAEHDRMLAAMILPCVVVAVDLAAARVRVRSGDWTSGWLRWHSLAAGKVRHWRAPSIGEQGVLLSPSGGVSMGTFIPGLYGDAGTAPDNSASSETWRFDDGASLSYDWAAHRYRVELPSGTVEVRVGASEVRVSDGAVSLKAPKISLEGPVEIAGTLTVSGDILGGGSIIDTAGNSNHHTH
ORF09	pyocin R2_PP, baseplate assembly protein W	4306	4632	+	atgatcgggatggatcgccgtagcgggctgcccctgtccggcctggctcatcttaaacagtccgtcgaggacatcctgaccaccccgttgggcagcaggcgcatgcgccccgagtacggcagcaagctgcggcggatggtcgacatgccggtgagcgaaggctggaaaagcgccgtgcaggccgaggtagcccgttccctggggcgctgggaaccgcgcatcgcattgtctgccgtgcgagtcgtcgcagtcgtcgatggccgcgtggatctgctcctgagcggcgtgttcgagggcgagaacatcaatatggaggtctcggcgtga	MIGMDRRSGLPLSGLAHLKQSVEDILTTPLGSRRMRPEYGSKLRRMVDMPVSEGWKSAVQAEVARSLGRWEPRIALSAVRVVAVVDGRVDLLLSGVFEGENINMEVSA
ORF10	pyocin R2_PP, baseplate assembly protein J	4629	5516	+	gtgatcatcgatctttcccagttgccggagccagaggttatcgaaaacctcgatttcgagacgatttaccaggagctgttgggtgacttccgcgaagccatggctggcgaatggacagcggaggtggagtccgatccggttctcaagcttctgcaactggcggcctatcgagaactgctgctgcgggcgcggatcaacgatgcggcgcgggcggtgatgctggcatacgccagcggtgccgatctcgaccagatcggtgccggcttcaatgtgcagcgtttgctgatcaggcccgctcagcccgaggcggtaccgccggtggaggcgcaatacgagagcgacaagtcgctgcgcaatcgcatccagctcgcgttcgagcagctatccgtcgcaggaccg…	MIIDLSQLPEPEVIENLDFETIYQELLGDFREAMAGEWTAEVESDPVLKLLQLAAYRELLLRARINDAARAVMLAYASGADLDQIGAGFNVQRLLIRPAQPEAVPPVEAQYESDKSLRNRIQLAFEQLSVAGPRNAYIAHALGADGRVADASATSPAPCEVLISVLGVEGNGQAPEAVLQAVRLALNAEDVRPVADRVTVRSAGIVPYQVKAQLYLFPGPEAELIRAAAEASLRDYISAQRRLGRDIRRSALFATLHVEGVQRVELQEPAADVVLDETQAAYCTGYAITLGGVDE
ORF11	pyocin R2_PP, tail formation protein I	5509	6042	+	atgagtagccgactgctgccgccaaacaggagttcactggaacgctctctgggtgatgtattgcctgccgaactgccggtgccgcttcgtgagcttaacgatccggcacgctgtgaggcggccttgttgccctacctggcctggacgcgctcggtggaccgctgggacccggactggagcgacgaggccaagcgcaatgcggtagcgacgtccttcgtcctgcaccagcgcaaaggcacgctgaccgcgttgcgccaagtggtcgagccgatcggtgcgctgagcgaggtcaccgaatggtggcagcgaagcccgaccggcgtgccggggaccttcgagatcaccgtggacgtcagcgaccgtggcatcgacgaaggcaccgtactggagctggagcgc…	MSSRLLPPNRSSLERSLGDVLPAELPVPLRELNDPARCEAALLPYLAWTRSVDRWDPDWSDEAKRNAVATSFVLHQRKGTLTALRQVVEPIGALSEVTEWWQRSPTGVPGTFEITVDVSDRGIDEGTVLELERLLDDVRPVSRHLTRLDLRITPVIRSRHGLAVTDGDTLEIFPWKQ
ORF12	Tail fiber protein H, putative	6044	8152	+	atgacgaccaatactccgaaatacggtggcctgctcaccgacataggtgccgctgcgctggctgcggccagcgcagcaggcaagaaatggcagccgactcatatgctgatcggcgatgctggcggcgcaccgggtgctactccggatccgatacccgcagccacgcagacgaaactgatcaaccagcgctaccgggcgcagctcaatcgcttgttcgtgtcggacaagaacatcaatactctggttgccgaggtggtgctaccagttgaggtaggtggcttctggatccgcgagatcggcctgcaggatgccgacggcaagttcgtcgcggtatccaactgcccgcccagctacaaggcagcaatggaaagtggcagtgcgcggacccagaccattcgg…	MTTNTPKYGGLLTDIGAAALAAASAAGKKWQPTHMLIGDAGGAPGATPDPIPAATQTKLINQRYRAQLNRLFVSDKNINTLVAEVVLPVEVGGFWIREIGLQDADGKFVAVSNCPPSYKAAMESGSARTQTIRVNIALSGLENVQLLIDNGIIYATQDWVKEKVAADFKGRKILAGNGLVGGGDLSADRSIGLAPSGVTAGSYRSVTVNANGVVTQGSNPSTLAGYAIGDAYTKADTDGKLAQKANKATTLAGYGITDALRVDGNAVSSSRLAAPRSLAASGDASWSVTFDGSGNVSAPLSLSATGVAAGSYPKVTVDTKGRVTAGMALAATDIPGLDASKLVSGVLAEQRLPVFARGLATAVSTTSDPNTATVPLMLTNHANGPVAGRYFYIQSMFYP…
ORF13	Tail fiber assembly protein	8161	8601	+	atgatttttttccatgccgccactggcggtttctattcgaaggatgtccacggcgaccgcatgcccatcgacgcgcggatgtatcccctcgaggaagctgaatacctggcgctgttggtagcccagagcgagggcaagcagatcgtcgccgacgccgccggccgtccgttctgtatcgacccgccggccccggcagaagaggtcctggcccaccgtgagcgcatctggcgcgatcgccagttgacgcttactgatggccccatcgcccgtcaccgggatgagctcgacctgggcaagattacgaccctgaaccaggcgcaactgctcgaactcacgctgtaccgcgccagccttcgagactggccggcatccgcggcgtttcctgatttaggcgcaaga…	MIFFHAATGGFYSKDVHGDRMPIDARMYPLEEAEYLALLVAQSEGKQIVADAAGRPFCIDPPAPAEEVLAHRERIWRDRQLTLTDGPIARHRDELDLGKITTLNQAQLLELTLYRASLRDWPASAAFPDLGARPEPPLWLEPLITP
ORF14	pyocin R2_PP, tail sheath protein	8644	9804	+	atgagtttcttccacggcgttacggtaaccaacgtcgatatcggtgcgcgcaccatcgcgctgccggccagctccgtcatcggcctctgcgatgtgttcacgccgggggcgcaggcaagcgccaagcccaacgttccggtgctgctcaccagcaagaaggacgccgccgcggcgttcggcatcggctcgtcgatctatctggcctgcgaggccatctataaccgtgcccaggccgtgatcgtggcggtgggcgtggaagccgcggagactcccgaggcccaggccagcgccgtcataggtggtgtcagcgccgccggcgagcgcaccggactgcaggctctgctagacggcaagagccgcttcaatgctcagccgcgtctactagttgcgccgggtcat…	MSFFHGVTVTNVDIGARTIALPASSVIGLCDVFTPGAQASAKPNVPVLLTSKKDAAAAFGIGSSIYLACEAIYNRAQAVIVAVGVEAAETPEAQASAVIGGVSAAGERTGLQALLDGKSRFNAQPRLLVAPGHSAQQAVATAMDGLAEKLRAIAILDGPNSTDEAAVAYAKNFGSKRLFMVDPGVQVWDSATNAARNAPASAYAAGLFAWTDAEYGFWSSPSNKEIKGITGTSRPVEFLDGDETCRANLLNNANIATIIRDDGYRLWGNRTLSSDSKWAFVTRVRTMDLVMDAILAGHKWAVDRGITKTYVKDVTEGLRAFMRDLKNQGAVINFEVYADPDLNSASQLAQGKVYWNIRFTDVPPAENPNFRVEVTDQWLTEVLDVA
ORF15	Major tail tube protein	9817	10320	+	atgattccgcaaaccctgaccaataccaacctgttcatcgacggcgtgagcttcgccggtgacgtgccatccctgaccctgcccaagctggctgtgaagaccgagcaataccgtgccggcggcatggatgcgccggtatccatcgacatgggcctggaggcgatggaggccaagttctccaccaacggtgcccgccgagaagcactgaatttcttcggcctggccgaccagagcgctttcaatggcgtgttccgcggctccttcaagggccagaagggcgccagcgtgccagtggtggctaccctgcgcggcctgctcaaggaggtcgacccgggcgactggaaggccggcgagaaagccgagttcaagtacgccgttgcggtcagctactacaagctg…	MIPQTLTNTNLFIDGVSFAGDVPSLTLPKLAVKTEQYRAGGMDAPVSIDMGLEAMEAKFSTNGARREALNFFGLADQSAFNGVFRGSFKGQKGASVPVVATLRGLLKEVDPGDWKAGEKAEFKYAVAVSYYKLEVDGREVYEIDPVNGVRAINGVDQLAGMRNDLGL
ORF16	Phage tail assembly protein	10335	10679	+	atgacccaagagaatcgactgccgggctggctgacgctggatgccgacgccgccctcgttcgtctctcgcgtccggcacagtgcaacggggtcagcgtcgacacgctgaccctgcgtgcacccaccgtgcgtgatatccgcctggccggcaaggtggccggcgacgatgccgaggagcgcgaactgcaactgttcgcctcgctggcgcaggtcagccgccaggacctggaggggctgaagctgagcgactaccagcggctgcaaggcgcctactttcgcctggtgcaagacgacacggacgacaccttcgcgtatgcgtcaactggcgaggcgcctggccattga	MTQENRLPGWLTLDADAALVRLSRPAQCNGVSVDTLTLRAPTVRDIRLAGKVAGDDAEERELQLFASLAQVSRQDLEGLKLSDYQRLQGAYFRLVQDDTDDTFAYASTGEAPGH
ORF17	Phage tail tape measure protein	10849	13086	+	atgagtaaagacatggacctggtggtctccatcggcggcatcgccgacccctccttgggcaaggcattcgagaccgtcaaggcacggctcgacagtctccaggaacgttcccgccaggcgtccagcctgagggatgtgctgggagacgccatacgcctggagcgagaactcgccgatatgcgcaaggtcgggcaccgcggcgttgctgagcatgcccggcagcttggcgaacgccaggagcaactgaagcgactcggcatcgaggccagggccgcgggcgatgcctacgctcgactgggcgagatacagcgtggcctggatatgcaggtccgcggcctgcaacggctggagcaggccagccaggcaatgccattggctagcgcattttccggactggtc…	MSKDMDLVVSIGGIADPSLGKAFETVKARLDSLQERSRQASSLRDVLGDAIRLERELADMRKVGHRGVAEHARQLGERQEQLKRLGIEARAAGDAYARLGEIQRGLDMQVRGLQRLEQASQAMPLASAFSGLVVEASKTAAGYQARLRDLAIRNGLDAGREPALASLIQDSASQSGLGRTATLDMLEHLNATGMGFAAAQMNLGLAGRFGFGQGIASAEAAGLVRALQLAQGSDSPEQLSASLDRLVVLGKGRVGSEALARRLPALLSALGNAGEATAGDVGALGALLEIQAKNTTPDKADVRMKAWLEFVSSGSLKRAYGQNYDRDLEALRKDGASLLEANLELAARYRDKGGKLSAGAASPALEAYRASRGEFQGLLETQQSSVGSSERDAQRRKGM…
ORF18	pyocin R2_PP, tail formation protein U	13096	13968	+	atggcatatctggaacaattgcaggccggcctgaggtacctgggtcgcgccggcgagtccggacgcaagagtctggacaaggtggtcgctccggtgaacggcgcgatcagcgagatccgcggcgcagccgcggagctggagaacctgcccggcgtatcgccggaaatggctgcccggctgcagcgtgccatgcgcggcatcggccaggcgcagggcaaggtgaaccgcgtggtctccacctatgaccgggcgagccgggcgttgcttggtatcgacgaacgcctggatgcgctgaaggtccaggtgaacagtgccgcgcaggcggtcggcaaggtcgctggcgacatcagtccgacgctggcgggggtgctgccgtcgtggctgctggcaccctcggcg…	MAYLEQLQAGLRYLGRAGESGRKSLDKVVAPVNGAISEIRGAAAELENLPGVSPEMAARLQRAMRGIGQAQGKVNRVVSTYDRASRALLGIDERLDALKVQVNSAAQAVGKVAGDISPTLAGVLPSWLLAPSATPPSEAAAPLPHLLVLQPLTANAQPFYFNLNTAAFDALQRNSAYNWSGQVRLGRRPALQSVGMGEESILLKGAVFPLRRQVGNQEKVVGLEQLEALRRLAERREPLILSSGYGEVQMGLWCLVRISENQSALLGNGAPRKQTFDLEFKRYGDDLPNR
ORF19	pyocin R2_PP, tail protein X	13943	14149	+	atggcgacgacctgccgaaccgctgacggcgacatgctggacagcctctgctaccacgtctatggccatctgttgggctgcgtcgaggcgaccctcgacgccaatcccgggctggccgatgagcagcagccattccgcgccggcttgctgatcagtttccctgacatgccggtggtcaatgtcgaacaggtgcgcctgtgggattga	MATTCRTADGDMLDSLCYHVYGHLLGCVEATLDANPGLADEQQPFRAGLLISFPDMPVVNVEQVRLWD
ORF20	pyocin R2_PP, tail formation protein D	14207	15196	+	gtgcaaccgagtttccgtatcgttgccgacggcaccgacgtcacccagcggctgaatgaccgcctgctcaagctgaccttgctggacaagccgggcatggagtccgacagcctgatcttgaggctcgacgatcgcgatggacaggtggccttacccaggcgcggtgcggtgctggaggttcatctcggctatgccggcgagccactgatgcgcatgggacgctttaccgtggacaccttgcagtgggctggtccgccggactgcctgaccgttactgccaaggccggcgacatgcgcggcagtggcaagacgatacgcagcggcggttgggagggcactaccctggctcaggtctgccgcgatgttggcgcacgcaacggctggcgcgtggagtgtccg…	MQPSFRIVADGTDVTQRLNDRLLKLTLLDKPGMESDSLILRLDDRDGQVALPRRGAVLEVHLGYAGEPLMRMGRFTVDTLQWAGPPDCLTVTAKAGDMRGSGKTIRSGGWEGTTLAQVCRDVGARNGWRVECPLQVAIARVDQVNESDYHFVTRLARQYDCTAKLAEGMLMVLPRQSGQSATGRRIEPLVLGRADVGSFDVTFDDRSLMRTVKTRYQLPGSGEVKSVELKNPKAPATAMGEHVDRHLYASRGEAEQAAKARLASFSRSSASVRLELPGRGDLFAERSLLLQGFKAGIDGEFLIDSVEHTYSSSGWTTVVQCNGGRGGKG
ORF21	Glycoside hydrolase family 19	15229	15858	+	atgaaactgaccgagcagcaattgctgcgcatttttcccaacgcccgcctcgtcgcgggcgttttcgttgcggcgttgcaacgggccatggacgagagggagatcgacacaccggcgcggcgtgccgcgtttctcgcccaggtcggccacgaaagcagccagttgacccggctggtggagaacctcaactacagtgcccaaggcttggcggcgacctggccgagccgctatctcggccccgacgggcagcccaacgcgttggccttgcggctggcgcgcaatccgcaggcgattgccgacaacacctacgccacgcgcaacggcaatggcgacgaagcgtccggcgatggctggcgcttccgtgggcgtggcttgctacagatcaccgggcgtgccaac…	MKLTEQQLLRIFPNARLVAGVFVAALQRAMDEREIDTPARRAAFLAQVGHESSQLTRLVENLNYSAQGLAATWPSRYLGPDGQPNALALRLARNPQAIADNTYATRNGNGDEASGDGWRFRGRGLLQITGRANYRLVGEALGEPLEAEPWRLEQPVPAARSAAWWWAGHGLNELADRGEFAAITRRINGGLNGQAERLALWQRARAVLS
ORF22	Hypothetical protein	15855	16217	+	atgagccggctcgctctgctcctgccggccgtgttgctggtcctgctggccggcgccttgctcggcggcggcctggttgcccgccactatcgtccgcaactggaggaggccctgggccaactcactgccagccgcgtcgccagcggccagctcgaggctttgctcgatgagcagcagcgagcgctggcggcggtgcgggcgagcgccgagaggcgcgcgaaggacgtcgagcaggcactcggcgaggccagggcgcaggccgcggagcagtatgccgcggccgtgcgtctgctccgggaacccgacattggcacggactgccaggcggcaggtgcggcgatcgaccgggagctgggactatga	MSRLALLLPAVLLVLLAGALLGGGLVARHYRPQLEEALGQLTASRVASGQLEALLDEQQRALAAVRASAERRAKDVEQALGEARAQAAEQYAAAVRLLREPDIGTDCQAAGAAIDRELGL
ORF23	Lipoprotein	16214	16471	+	atgactcgtctcctgctggggctttgtctgcttttcgcgggctgcgcagcctcaccgacgacacctcgccccgtgcgcgtcgaggttcccctggcagtgccctgccgtgtacctgacgtgcgcccgccgagctgggccggcgccacgctgaaggccggcgattcgctgcaggccaaggttcgcgcattgctcgccgagcgccgccagcggcagggctacgaactcgaattgcaggcggcgttgcgtgcctgccgctaa	MTRLLLGLCLLFAGCAASPTTPRPVRVEVPLAVPCRVPDVRPPSWAGATLKAGDSLQAKVRALLAERRQRQGYELELQAALRACR
Sequences and annotation of the pyocin cluster 3-49_pyoR5. Start, stop and the strand for each gene are also shown.

## Sheet: 4-17_pyoR5
Position	Protein function	Start	Stop	Strand	Nucleotide sequence	Amino acid (AA) sequence
ORF01	Pyocin activator protein PrtN	316	2	-	gtgcagccaaccatcgcccctaccactccaattccacgccaggaaaccgtggaattggtctaccgcatcttcggcgacgtcctggtgccgctggagcaggtccgcgaacgctggtttcgcaacctgaacaaggaaaacttcagcaaggccctggcatgcgggcggatcgccctgccagtgacgaccctcgacgatagccacaaggccatgcagttcgtggccctcgatcacctcgccgcctacgtcgaccagcgcgcgaaccaagccggaagcgcccgtcgagcacagccaggcgcggacagcatcgcatcctga	MQPTIAPTTPIPRQETVELVYRIFGDVLVPLEQVRERWFRNLNKENFSKALACGRIALPVTTLDDSHKAMQFVALDHLAAYVDQRANQAGSARRAQPGADSIAS
ORF02	HTH-type transcriptional regulator PrtR	1186	416	-	atggacaagagcacccagatcccgcccgacagcttcgccgctcgcctcaagcaggccatggcgatgcgcaacctgaagcaggaaaccctcgccgaagcggcaggggtttcgcagaacaccattcacaagctgacctcgggcaaggcccagagcacccgcaagctgatcgagatcgcggcggccctgggcgtttcgccggtctggctgcagaccggcgaaggcactccagccgcgcgcagtgccgtgtccgtggccgatggcagcccattggtgctggaaccgctgcatccgtgggacagcgacacaccgctggacgaagacgaagtggaactgccgctgtacaaggaagtggagatgtccgccggcgccggacgcactgcggtacgcgagatagagggg…	MDKSTQIPPDSFAARLKQAMAMRNLKQETLAEAAGVSQNTIHKLTSGKAQSTRKLIEIAAALGVSPVWLQTGEGTPAARSAVSVADGSPLVLEPLHPWDSDTPLDEDEVELPLYKEVEMSAGAGRTAVREIEGRKLRFSYATLRASGVDPSAAICAQLTGNSMEPLIMDGSTIGVDTATTHITDGEIYALEHDGMLRVKFVYRLPGGGIRLRSFNREEYPDEEYSPEDMRSRQISMIGWVFWWSTVRHRRAPSLVR
ORF03	Hypothetical protein	1441	1271	-	atggacggcgctccggccctccagatgccggagcgctttcccgtggccccggcacccaagcagtcggcacctgcatcgtcggtcgccgacaaccgggtgtgtccctgcacccatgtgaaatctctgaaaggcgggtgggaagttgtggaactcaccccttccgctttctga	MDGAPALQMPERFPVAPAPKQSAPASSVADNRVCPCTHVKSLKGGWEVVELTPSAF
ORF04	Repressor, PtrB	1644	1844	+	atggctgaccttgccgatcacgccaacgaactggtcctggctcgcctcgacggcctcctggcggcgcgcccggcgctggccatccgcgagtccgcggaagactgcgaggactgcggcgagcccattccccaggcgcgccgtcgggcggcaccgggttgcagtcgctgcatcgactgccaggaccgccacgagcgccgttga	MADLADHANELVLARLDGLLAARPALAIRESAEDCEDCGEPIPQARRRAAPGCSRCIDCQDRHERR
ORF05	Antiterminator Q protein; RNA polymerase	1892	2251	+	gtgatcaaagccatcgatgaaatgctcaagctctgggccgaggaaatgcacgcgccaggcagcaacggaggcggctacgccggcggcaacctgatcgccatgctgatcgccagcaagggcgaggtggtccgcggccaccgtggcagccgggtgatcctcgaccgtgtggcggaggtcgatcgcctggtaaatcgcctacccgaggaactgaagaccgtggtggtggagcactatctcaatcgcgacagcttccccgagcagaagtaccgtcactgcggttgcagccgcaacaccttctatctgcgcctgcatgtggcgcaccagggtatccaggacggcctgctgcgacgggcggcctga	MIKAIDEMLKLWAEEMHAPGSNGGGYAGGNLIAMLIASKGEVVRGHRGSRVILDRVAEVDRLVNRLPEELKTVVVEHYLNRDSFPEQKYRHCGCSRNTFYLRLHVAHQGIQDGLLRRAA
ORF06	Pyocin R2, holin	2710	3063	+	atgggcaacgaaccgcagacactgacggaaatgccgctctgggtactgatcctgctcgccgcgctgggcggcgtcagcggcgagatgtggcgtgccgacaaggccggtctcggcggctgggccttgttgcggcgcctggcgctgcgctccggcgcgtcgatcgtctgcggcgtggcggtgatgctgctggcgttggcttgcggcgccgcgctgctgttcgccgcggcgctgggcagcctgaccgccgcggccggcgcggagatcgccgtcggtctctacgaacgctgggccgcccggcgcctgggggtttgcgagctgcccgaggaacagtcgggcgaccgtggcccgcattga	MGNEPQTLTEMPLWVLILLAALGGVSGEMWRADKAGLGGWALLRRLALRSGASIVCGVAVMLLALACGAALLFAAALGSLTAAAGAEIAVGLYERWAARRLGVCELPEEQSGDRGPH
ORF07	Collar PA0615; bacteriocin, pyocin	3085	3600	+	atgcctgaacaggctgttacgctcgaggctctgtacgcggccatcgagcaggtactgcgtgagcgtctgccggaggcgcagttgatcggcttctggccaggcgtgccggaaaataccccggcggtttccctggaaatggccgagctgctgcccgagcgcgatcccggtaccggcgagagcgccctgctgtgccgcctgcaggcgcggataatggtgccgcctggtgccgatcgccaggcggtatccattgcttgcggaatcgttcggacattgcgcgagcagacctggaacctgtctctggaaccggcgcgcttcgtacgctcggccgtcgacggcagtcgcgaggagctgaagagcctgcgtgtctggctggtcgagtggacgcagtcgctgcgtctc…	MPEQAVTLEALYAAIEQVLRERLPEAQLIGFWPGVPENTPAVSLEMAELLPERDPGTGESALLCRLQARIMVPPGADRQAVSIACGIVRTLREQTWNLSLEPARFVRSAVDGSREELKSLRVWLVEWTQSLRLGDPEWAWEDQPPGSLMLGFDPQTGPGHEPDYFAPEALA
ORF08	pyocin R2_PP, baseplate assembly protein V	3597	4154	+	atgagctatgtcagtgcggagcatgaccgcatgctcgccgcgatgatcctgccctgtgtggtggtcgccgtggacctggcagcggcgcgggtacgggtgcgctccggcgactggaccagcggctggctgcgctggcactccctggcagccggcaaggttcgccactggcgtgcgccgagcataggcgaacagggggtactgctcagtccgtcgggcggagtgtcaatgggtacctttattcccggtctgtacggcgatgcgggcacggcgccggacaacagcgccagcagtgagacctggcgtttcgacgacggcgcctcgttgagttacgactgggctgcgcatcgctaccgcgtcgagctgcccagcggcaccgtggaagtgagggtcggcgccagc…	MSYVSAEHDRMLAAMILPCVVVAVDLAAARVRVRSGDWTSGWLRWHSLAAGKVRHWRAPSIGEQGVLLSPSGGVSMGTFIPGLYGDAGTAPDNSASSETWRFDDGASLSYDWAAHRYRVELPSGTVEVRVGASEVRVSDGAVSLKAPKISLEGPVEIAGTLTVSGDILGGGSIIDTAGNSNHHTH
ORF09	pyocin R2_PP, baseplate assembly protein W	4307	4633	+	atgatcgggatggatcgccgtagcgggctgcccctgtccggcctggctcatcttaaacagtccgtcgaggacatcctgaccaccccgttgggcagcaggcgcatgcgccccgagtacggcagcaagctgcggcggatggtcgacatgccggtgagcgaaggctggaaaagcgccgtgcaggccgaggtagcccgttccctggggcgctgggaaccgcgcatcgcattgtctgccgtgcgagtcgtcgcagtcgtcgatggccgcgtggatctgctcctgagcggcgtgttcgagggcgagaacatcaatatggaggtctcggcgtga	MIGMDRRSGLPLSGLAHLKQSVEDILTTPLGSRRMRPEYGSKLRRMVDMPVSEGWKSAVQAEVARSLGRWEPRIALSAVRVVAVVDGRVDLLLSGVFEGENINMEVSA
ORF10	pyocin R2_PP, baseplate assembly protein J	4630	5517	+	gtgatcatcgatctttcccagttgccggagccagaggttatcgaaaacctcgatttcgagacgatttaccaggagctgttgggtgacttccgcgaagccatggctggcgaatggacagcggaggtggagtccgatccggttctcaagcttctgcaactggcggcctatcgagaactgctgctgcgggcgcggatcaacgatgcggcgcgggcggtgatgctggcatacgccagcggtgccgatctcgaccagatcggtgccggcttcaatgtgcagcgtttgctgatcaggcccgctcagcccgaggcggtaccgccggtggaggcgcaatacgagagcgacaagtcgctgcgcaatcgcatccagctcgcgttcgagcagctatccgtcgcaggaccg…	MIIDLSQLPEPEVIENLDFETIYQELLGDFREAMAGEWTAEVESDPVLKLLQLAAYRELLLRARINDAARAVMLAYASGADLDQIGAGFNVQRLLIRPAQPEAVPPVEAQYESDKSLRNRIQLAFEQLSVAGPRNAYIAHALGADGRVADASATSPAPCEVLISVLGVEGNGQAPEAVLQAVRLALNAEDVRPVADRVTVRSAGIVPYQVKAQLYLFPGPEAELIRAAAEASLRDYISAQRRLGRDIRRSALFATLHVEGVQRVELQEPAADVVLDETQAAYCTGYAITLGGVDE
ORF11	pyocin R2_PP, tail formation protein I	5510	6043	+	atgagtagccgactgctgccgccaaacaggagttcactggaacgctctctgggtgatgtattgcctgccgaactgccggtgccgcttcgtgagcttaacgatccggcacgctgtgaggcggccttgttgccctacctggcctggacgcgctcggtggaccgctgggacccggactggagcgacgaggccaagcgcaatgcggtagcgacgtccttcgtcctgcaccagcgcaaaggcacgctgaccgcgttgcgccaagtggtcgagccgatcggtgcgctgagcgaggtcaccgaatggtggcagcgaagcccgaccggcgtgccggggaccttcgagatcaccgtggacgtcagcgaccgtggcatcgacgaaggcaccgtactggagctggagcgc…	MSSRLLPPNRSSLERSLGDVLPAELPVPLRELNDPARCEAALLPYLAWTRSVDRWDPDWSDEAKRNAVATSFVLHQRKGTLTALRQVVEPIGALSEVTEWWQRSPTGVPGTFEITVDVSDRGIDEGTVLELERLLDDVRPVSRHLTRLDLRITPVIRSRHGLAVTDGDTLEIFPWKQ
ORF12	Tail fiber protein H, putative	6045	8153	+	atgacgaccaatactccgaaatacggtggcctgctcaccgacataggtgccgctgcgctggctgcggccagcgcagcaggcaagaaatggcagccgactcatatgctgatcggcgatgctggcggcgcaccgggtgctactccggatccgatacccgcagccacgcagacgaaactgatcaaccagcgctaccgggcgcagctcaatcgcttgttcgtgtcggacaagaacatcaatactctggttgccgaggtggtgctaccagttgaggtaggtggcttctggatccgcgagatcggcctgcaggatgccgacggcaagttcgtcgcggtatccaactgcccgcccagctacaaggcagcaatggaaagtggcagtgcgcggacccagaccattcgg…	MTTNTPKYGGLLTDIGAAALAAASAAGKKWQPTHMLIGDAGGAPGATPDPIPAATQTKLINQRYRAQLNRLFVSDKNINTLVAEVVLPVEVGGFWIREIGLQDADGKFVAVSNCPPSYKAAMESGSARTQTIRVNIALSGLENVQLLIDNGIIYATQDWVKEKVAADFKGRKILAGNGLVGGGDLSADRSIGLAPSGVTAGSYRSVTVNANGVVTQGSNPSTLAGYAIGDAYTKADTDGKLAQKANKATTLAGYGITDALRVDGNAVSSSRLAAPRSLAASGDASWSVTFDGSGNVSAPLSLSATGVAAGSYPKVTVDTKGRVTAGMALAATDIPGLDASKLVSGVLAEQRLPVFARGLATAVSTTSDPNTATVPLMLTNHANGPVAGRYFYIQSMFYP…
ORF13	Tail fiber assembly protein	8162	8602	+	atgatttttttccatgccgccactggcggtttctattcgaaggatgtccacggcgaccgcatgcccatcgacgcgcggatgtatcccctcgaggaagctgaatacctggcgctgttggtagcccagagcgagggcaagcagatcgtcgccgacgccgccggccgtccgttctgtatcgacccgccggccccggcagaagaggtcctggcccaccgtgagcgcatctggcgcgatcgccagttgacgcttactgatggccccatcgcccgtcaccgggatgagctcgacctgggcaagattacgaccctgaaccaggcgcaactgctcgaactcacgctgtaccgcgccagccttcgagactggccggcatccgcggcgtttcctgatttaggcgcaaga…	MIFFHAATGGFYSKDVHGDRMPIDARMYPLEEAEYLALLVAQSEGKQIVADAAGRPFCIDPPAPAEEVLAHRERIWRDRQLTLTDGPIARHRDELDLGKITTLNQAQLLELTLYRASLRDWPASAAFPDLGARPEPPLWLEPLITP
ORF14	pyocin R2_PP, tail sheath protein	8645	9805	+	atgagtttcttccacggcgttacggtaaccaacgtcgatatcggtgcgcgcaccatcgcgctgccggccagctccgtcatcggcctctgcgatgtgttcacgccgggggcgcaggcaagcgccaagcccaacgttccggtgctgctcaccagcaagaaggacgccgccgcggcgttcggcatcggctcgtcgatctatctggcctgcgaggccatctataaccgtgcccaggccgtgatcgtggcggtgggcgtggaagccgcggagactcccgaggcccaggccagcgccgtcataggtggtgtcagcgccgccggcgagcgcaccggactgcaggctctgctagacggcaagagccgcttcaatgctcagccgcgtctactagttgcgccgggtcat…	MSFFHGVTVTNVDIGARTIALPASSVIGLCDVFTPGAQASAKPNVPVLLTSKKDAAAAFGIGSSIYLACEAIYNRAQAVIVAVGVEAAETPEAQASAVIGGVSAAGERTGLQALLDGKSRFNAQPRLLVAPGHSAQQAVATAMDGLAEKLRAIAILDGPNSTDEAAVAYAKNFGSKRLFMVDPGVQVWDSATNAARNAPASAYAAGLFAWTDAEYGFWSSPSNKEIKGITGTSRPVEFLDGDETCRANLLNNANIATIIRDDGYRLWGNRTLSSDSKWAFVTRVRTMDLVMDAILAGHKWAVDRGITKTYVKDVTEGLRAFMRDLKNQGAVINFEVYADPDLNSASQLAQGKVYWNIRFTDVPPAENPNFRVEVTDQWLTEVLDVA
ORF15	Major tail tube protein	9818	10321	+	atgattccgcaaaccctgaccaataccaacctgttcatcgacggcgtgagcttcgccggtgacgtgccatccctgaccctgcccaagctggctgtgaagaccgagcaataccgtgccggcggcatggatgcgccggtatccatcgacatgggcctggaggcgatggaggccaagttctccaccaacggtgcccgccgagaagcactgaatttcttcggcctggccgaccagagcgctttcaatggcgtgttccgcggctccttcaagggccagaagggcgccagcgtgccagtggtggctaccctgcgcggcctgctcaaggaggtcgacccgggcgactggaaggccggcgagaaagccgagttcaagtacgccgttgcggtcagctactacaagctg…	MIPQTLTNTNLFIDGVSFAGDVPSLTLPKLAVKTEQYRAGGMDAPVSIDMGLEAMEAKFSTNGARREALNFFGLADQSAFNGVFRGSFKGQKGASVPVVATLRGLLKEVDPGDWKAGEKAEFKYAVAVSYYKLEVDGREVYEIDPVNGVRAINGVDQLAGMRNDLGL
ORF16	Phage tail assembly protein	10336	10680	+	atgacccaagagaatcgactgccgggctggctgacgctggatgccgacgccgccctcgttcgtctctcgcgtccggcacagtgcaacggggtcagcgtcgacacgctgaccctgcgtgcacccaccgtgcgtgatatccgcctggccggcaaggtggccggcgacgatgccgaggagcgcgaactgcaactgttcgcctcgctggcgcaggtcagccgccaggacctggaggggctgaagctgagcgactaccagcggctgcaaggcgcctactttcgcctggtgcaagacgacacggacgacaccttcgcgtatgcgtcaactggcgaggcgcctggccattga	MTQENRLPGWLTLDADAALVRLSRPAQCNGVSVDTLTLRAPTVRDIRLAGKVAGDDAEERELQLFASLAQVSRQDLEGLKLSDYQRLQGAYFRLVQDDTDDTFAYASTGEAPGH
ORF17	Phage tail tape measure protein	10850	13087	+	atgagtaaagacatggacctggtggtctccatcggcggcatcgccgacccctccttgggcaaggcattcgagaccgtcaaggcacggctcgacagtctccaggaacgttcccgccaggcgtccagcctgagggatgtgctgggagacgccatacgcctggagcgagaactcgccgatatgcgcaaggtcgggcaccgcggcgttgctgagcatgcccggcagcttggcgaacgccaggagcaactgaagcgactcggcatcgaggccagggccgcgggcgatgcctacgctcgactgggcgagatacagcgtggcctggatatgcaggtccgcggcctgcaacggctggagcaggccagccaggcaatgccattggctagcgcattttccggactggtc…	MSKDMDLVVSIGGIADPSLGKAFETVKARLDSLQERSRQASSLRDVLGDAIRLERELADMRKVGHRGVAEHARQLGERQEQLKRLGIEARAAGDAYARLGEIQRGLDMQVRGLQRLEQASQAMPLASAFSGLVVEASKTAAGYQARLRDLAIRNGLDAGREPALASLIQDSASQSGLGRTATLDMLEHLNATGMGFAAAQMNLGLAGRFGFGQGIASAEAAGLVRALQLAQGSDSPEQLSASLDRLVVLGKGRVGSEALARRLPALLSALGNAGEATAGDVGALGALLEIQAKNTTPDKADVRMKAWLEFVSSGSLKRAYGQNYDRDLEALRKDGASLLEANLELAARYRDKGGKLSAGAASPALEAYRASRGEFQGLLETQQSSVGSSERDAQRRKGM…
ORF18	pyocin R2_PP, tail formation protein U	13097	13969	+	atggcatatctggaacaattgcaggccggcctgaggtacctgggtcgcgccggcgagtccggacgcaagagtctggacaaggtggtcgctccggtgaacggcgcgatcagcgagatccgcggcgcagccgcggagctggagaacctgcccggcgtatcgccggaaatggctgcccggctgcagcgtgccatgcgcggcatcggccaggcgcagggcaaggtgaaccgcgtggtctccacctatgaccgggcgagccgggcgttgcttggtatcgacgaacgcctggatgcgctgaaggtccaggtgaacagtgccgcgcaggcggtcggcaaggtcgctggcgacatcagtccgacgctggcgggggtgctgccgtcgtggctgctggcaccctcggcg…	MAYLEQLQAGLRYLGRAGESGRKSLDKVVAPVNGAISEIRGAAAELENLPGVSPEMAARLQRAMRGIGQAQGKVNRVVSTYDRASRALLGIDERLDALKVQVNSAAQAVGKVAGDISPTLAGVLPSWLLAPSATPPSEAAAPLPHLLVLQPLTANAQPFYFNLNTAAFDALQRNSAYNWSGQVRLGRRPALQSVGMGEESILLKGAVFPLRRQVGNQEKVVGLEQLEALRRLAERREPLILSSGYGEVQMGLWCLVRISENQSALLGNGAPRKQTFDLEFKRYGDDLPNR
ORF19	pyocin R2_PP, tail protein X	13944	14150	+	atggcgacgacctgccgaaccgctgacggcgacatgctggacagcctctgctaccacgtctatggccatctgttgggctgcgtcgaggcgaccctcgacgccaatcccgggctggccgatgagcagcagccattccgcgccggcttgctgatcagtttccctgacatgccggtggtcaatgtcgaacaggtgcgcctgtgggattga	MATTCRTADGDMLDSLCYHVYGHLLGCVEATLDANPGLADEQQPFRAGLLISFPDMPVVNVEQVRLWD
ORF20	pyocin R2_PP, tail formation protein D	14208	15197	+	gtgcaaccgagtttccgtatcgttgccgacggcaccgacgtcacccagcggctgaatgaccgcctgctcaagctgaccttgctggacaagccgggcatggagtccgacagcctgatcttgaggctcgacgatcgcgatggacaggtggccttacccaggcgcggtgcggtgctggaggttcatctcggctatgccggcgagccactgatgcgcatgggacgctttaccgtggacaccttgcagtgggctggtccgccggactgcctgaccgttactgccaaggccggcgacatgcgcggcagtggcaagacgatacgcagcggcggttgggagggcactaccctggctcaggtctgccgcgatgttggcgcacgcaacggctggcgcgtggagtgtccg…	MQPSFRIVADGTDVTQRLNDRLLKLTLLDKPGMESDSLILRLDDRDGQVALPRRGAVLEVHLGYAGEPLMRMGRFTVDTLQWAGPPDCLTVTAKAGDMRGSGKTIRSGGWEGTTLAQVCRDVGARNGWRVECPLQVAIARVDQVNESDYHFVTRLARQYDCTAKLAEGMLMVLPRQSGQSATGRRIEPLVLGRADVGSFDVTFDDRSLMRTVKTRYQLPGSGEVKSVELKNPKAPATAMGEHVDRHLYASRGEAEQAAKARLASFSRSSASVRLELPGRGDLFAERSLLLQGFKAGIDGEFLIDSVEHTYSSSGWTTVVQCNGGRGGKG
ORF21	Glycoside hydrolase family 19	15230	15859	+	atgaaactgaccgagcagcaattgctgcgcatttttcccaacgcccgcctcgtcgcgggcgttttcgttgcggcgttgcaacgggccatggacgagagggagatcgacacaccggcgcggcgtgccgcgtttctcgcccaggtcggccacgaaagcagccagttgacccggctggtggagaacctcaactacagtgcccaaggcttggcggcgacctggccgagccgctatctcggccccgacgggcagcccaacgcgttggccttgcggctggcgcgcaatccgcaggcgattgccgacaacacctacgccacgcgcaacggcaatggcgacgaagcgtccggcgatggctggcgcttccgtgggcgtggcttgctacagatcaccgggcgtgccaac…	MKLTEQQLLRIFPNARLVAGVFVAALQRAMDEREIDTPARRAAFLAQVGHESSQLTRLVENLNYSAQGLAATWPSRYLGPDGQPNALALRLARNPQAIADNTYATRNGNGDEASGDGWRFRGRGLLQITGRANYRLVGEALGEPLEAEPWRLEQPVPAARSAAWWWAGHGLNELADRGEFAAITRRINGGLNGQAERLALWQRARAVLS
ORF22	Hypothetical protein	15856	16218	+	atgagccggctcgctctgctcctgccggccgtgttgctggtcctgctggccggcgccttgctcggcggcggcctggttgcccgccactatcgtccgcaactggaggaggccctgggccaactcactgccagccgcgtcgccagcggccagctcgaggctttgctcgatgagcagcagcgagcgctggcggcggtgcgggcgagcgccgagaggcgcgcgaaggacgtcgagcaggcactcggcgaggccagggcgcaggccgcggagcagtatgccgcggccgtgcgtctgctccgggaacccgacattggcacggactgccaggcggcaggtgcggcgatcgaccgggagctgggactatga	MSRLALLLPAVLLVLLAGALLGGGLVARHYRPQLEEALGQLTASRVASGQLEALLDEQQRALAAVRASAERRAKDVEQALGEARAQAAEQYAAAVRLLREPDIGTDCQAAGAAIDRELGL
ORF23	Lipoprotein	16215	16472	+	atgactcgtctcctgctggggctttgtctgcttttcgcgggctgcgcagcctcaccgacgacacctcgccccgtgcgcgtcgaggttcccctggcagtgccctgccgtgtacctgacgtgcgcccgccgagctgggccggcgccacgctgaaggccggcgattcgctgcaggccaaggttcgcgcattgctcgccgagcgccgccagcggcagggctacgaactcgaattgcaggcggcgttgcgtgcctgccgctaa	MTRLLLGLCLLFAGCAASPTTPRPVRVEVPLAVPCRVPDVRPPSWAGATLKAGDSLQAKVRALLAERRQRQGYELELQAALRACR
Sequences and annotation of the pyocin cluster 4-17_pyoR5. Start, stop and the strand for each gene are also shown.

## Sheet: 4-71_pyoR5
Position	Protein function	Start	Stop	Strand	Nucleotide sequence	Amino acid (AA) sequence
ORF01	Pyocin activator protein PrtN	315	1	-	gtgcagccaaccatcgcccctaccactccaattccacgccaggaaaccgtggaattggtctaccgcatcttcggcgacgtcctggtgccgctggagcaggtccgcgaacgctggtttcgcaacctgaacaaggaaaacttcagcaaggccctggcatgcgggcggatcgccctgccagtgacgaccctcgacgatagccacaaggccatgcagttcgtggccctcgatcacctcgccgcctacgtcgaccagcgcgcgaaccaagccggaagcgcccgtcgagcacagccaggcgcggacagcatcgcatcctga	MQPTIAPTTPIPRQETVELVYRIFGDVLVPLEQVRERWFRNLNKENFSKALACGRIALPVTTLDDSHKAMQFVALDHLAAYVDQRANQAGSARRAQPGADSIAS
ORF02	HTH-type transcriptional regulator PrtR	1185	415	-	atggacaagagcacccagatcccgcccgacagcttcgccgctcgcctcaagcaggccatggcgatgcgcaacctgaagcaggaaaccctcgccgaagcggcaggggtttcgcagaacaccattcacaagctgacctcgggcaaggcccagagcacccgcaagctgatcgagatcgcggcggccctgggcgtttcgccggtctggctgcagaccggcgaaggcactccagccgcgcgcagtgccgtgtccgtggccgatggcagcccattggtgctggaaccgctgcatccgtgggacagcgacacaccgctggacgaagacgaagtggaactgccgctgtacaaggaagtggagatgtccgccggcgccggacgcactgcggtacgcgagatagagggg…	MDKSTQIPPDSFAARLKQAMAMRNLKQETLAEAAGVSQNTIHKLTSGKAQSTRKLIEIAAALGVSPVWLQTGEGTPAARSAVSVADGSPLVLEPLHPWDSDTPLDEDEVELPLYKEVEMSAGAGRTAVREIEGRKLRFSYATLRASGVDPSAAICAQLTGNSMEPLIMDGSTIGVDTATTHITDGEIYALEHDGMLRVKFVYRLPGGGIRLRSFNREEYPDEEYSPEDMRSRQISMIGWVFWWSTVRHRRAPSLVR
ORF03	Hypothetical protein	1440	1270	-	atggacggcgctccggccctccagatgccggagcgctttcccgtggccccggcacccaagcagtcggcacctgcatcgtcggtcgccgacaaccgggtgtgtccctgcacccatgtgaaatctctgaaaggcgggtgggaagttgtggaactcaccccttccgctttctga	MDGAPALQMPERFPVAPAPKQSAPASSVADNRVCPCTHVKSLKGGWEVVELTPSAF
ORF04	Repressor, PtrB	1643	1843	+	atggctgaccttgccgatcacgccaacgaactggtcctggctcgcctcgacggcctcctggcggcgcgcccggcgctggccatccgcgagtccgcggaagactgcgaggactgcggcgagcccattccccaggcgcgccgtcgggcggcaccgggttgcagtcgctgcatcgactgccaggaccgccacgagcgccgttga	MADLADHANELVLARLDGLLAARPALAIRESAEDCEDCGEPIPQARRRAAPGCSRCIDCQDRHERR
ORF05	Antiterminator Q protein; RNA polymerase	1891	2250	+	gtgatcaaagccatcgatgaaatgctcaagctctgggccgaggaaatgcacgcgccaggcagcaacggaggcggctacgccggcggcaacctgatcgccatgctgatcgccagcaagggcgaggtggtccgcggccaccgtggcagccgggtgatcctcgaccgtgtggcggaggtcgatcgcctggtaaatcgcctacccgaggaactgaagaccgtggtggtggagcactatctcaatcgcgacagcttccccgagcagaagtaccgtcactgcggttgcagccgcaacaccttctatctgcgcctgcatgtggcgcaccagggtatccaggacggcctgctgcgacgggcggcctga	MIKAIDEMLKLWAEEMHAPGSNGGGYAGGNLIAMLIASKGEVVRGHRGSRVILDRVAEVDRLVNRLPEELKTVVVEHYLNRDSFPEQKYRHCGCSRNTFYLRLHVAHQGIQDGLLRRAA
ORF06	Pyocin R2, holin	2709	3062	+	atgggcaacgaaccgcagacactgacggaaatgccgctctgggtactgatcctgctcgccgcgctgggcggcgtcagcggcgagatgtggcgtgccgacaaggccggtctcggcggctgggccttgttgcggcgcctggcgctgcgctccggcgcgtcgatcgtctgcggcgtggcggtgatgctgctggcgttggcttgcggcgccgcgctgctgttcgccgcggcgctgggcagcctgaccgccgcggccggcgcggagatcgccgtcggtctctacgaacgctgggccgcccggcgcctgggggtttgcgagctgcccgaggaacagtcgggcgaccgtggcccgcattga	MGNEPQTLTEMPLWVLILLAALGGVSGEMWRADKAGLGGWALLRRLALRSGASIVCGVAVMLLALACGAALLFAAALGSLTAAAGAEIAVGLYERWAARRLGVCELPEEQSGDRGPH
ORF07	Collar PA0615; bacteriocin, pyocin	3084	3599	+	atgcctgaacaggctgttacgctcgaggctctgtacgcggccatcgagcaggtactgcgtgagcgtctgccggaggcgcagttgatcggcttctggccaggcgtgccggaaaataccccggcggtttccctggaaatggccgagctgctgcccgagcgcgatcccggtaccggcgagagcgccctgctgtgccgcctgcaggcgcggataatggtgccgcctggtgccgatcgccaggcggtatccattgcttgcggaatcgttcggacattgcgcgagcagacctggaacctgtctctggaaccggcgcgcttcgtacgctcggccgtcgacggcagtcgcgaggagctgaagagcctgcgtgtctggctggtcgagtggacgcagtcgctgcgtctc…	MPEQAVTLEALYAAIEQVLRERLPEAQLIGFWPGVPENTPAVSLEMAELLPERDPGTGESALLCRLQARIMVPPGADRQAVSIACGIVRTLREQTWNLSLEPARFVRSAVDGSREELKSLRVWLVEWTQSLRLGDPEWAWEDQPPGSLMLGFDPQTGPGHEPDYFAPEALA
ORF08	pyocin R2_PP, baseplate assembly protein V	3596	4153	+	atgagctatgtcagtgcggagcatgaccgcatgctcgccgcgatgatcctgccctgtgtggtggtcgccgtggacctggcagcggcgcgggtacgggtgcgctccggcgactggaccagcggctggctgcgctggcactccctggcagccggcaaggttcgccactggcgtgcgccgagcataggcgaacagggggtactgctcagtccgtcgggcggagtgtcaatgggtacctttattcccggtctgtacggcgatgcgggcacggcgccggacaacagcgccagcagtgagacctggcgtttcgacgacggcgcctcgttgagttacgactgggctgcgcatcgctaccgcgtcgagctgcccagcggcaccgtggaagtgagggtcggcgccagc…	MSYVSAEHDRMLAAMILPCVVVAVDLAAARVRVRSGDWTSGWLRWHSLAAGKVRHWRAPSIGEQGVLLSPSGGVSMGTFIPGLYGDAGTAPDNSASSETWRFDDGASLSYDWAAHRYRVELPSGTVEVRVGASEVRVSDGAVSLKAPKISLEGPVEIAGTLTVSGDILGGGSIIDTAGNSNHHTH
ORF09	pyocin R2_PP, baseplate assembly protein W	4306	4632	+	atgatcgggatggatcgccgtagcgggctgcccctgtccggcctggctcatcttaaacagtccgtcgaggacatcctgaccaccccgttgggcagcaggcgcatgcgccccgagtacggcagcaagctgcggcggatggtcgacatgccggtgagcgaaggctggaaaagcgccgtgcaggccgaggtagcccgttccctggggcgctgggaaccgcgcatcgcattgtctgccgtgcgagtcgtcgcagtcgtcgatggccgcgtggatctgctcctgagcggcgtgttcgagggcgagaacatcaatatggaggtctcggcgtga	MIGMDRRSGLPLSGLAHLKQSVEDILTTPLGSRRMRPEYGSKLRRMVDMPVSEGWKSAVQAEVARSLGRWEPRIALSAVRVVAVVDGRVDLLLSGVFEGENINMEVSA
ORF10	pyocin R2_PP, baseplate assembly protein J	4629	5516	+	gtgatcatcgatctttcccagttgccggagccagaggttatcgaaaacctcgatttcgagacgatttaccaggagctgttgggtgacttccgcgaagccatggctggcgaatggacagcggaggtggagtccgatccggttctcaagcttctgcaactggcggcctatcgagaactgctgctgcgggcgcggatcaacgatgcggcgcgggcggtgatgctggcatacgccagcggtgccgatctcgaccagatcggtgccggcttcaatgtgcagcgtttgctgatcaggcccgctcagcccgaggcggtaccgccggtggaggcgcaatacgagagcgacaagtcgctgcgcaatcgcatccagctcgcgttcgagcagctatccgtcgcaggaccg…	MIIDLSQLPEPEVIENLDFETIYQELLGDFREAMAGEWTAEVESDPVLKLLQLAAYRELLLRARINDAARAVMLAYASGADLDQIGAGFNVQRLLIRPAQPEAVPPVEAQYESDKSLRNRIQLAFEQLSVAGPRNAYIAHALGADGRVADASATSPAPCEVLISVLGVEGNGQAPEAVLQAVRLALNAEDVRPVADRVTVRSAGIVPYQVKAQLYLFPGPEAELIRAAAEASLRDYISAQRRLGRDIRRSALFATLHVEGVQRVELQEPAADVVLDETQAAYCTGYAITLGGVDE
ORF11	pyocin R2_PP, tail formation protein I	5509	6042	+	atgagtagccgactgctgccgccaaacaggagttcactggaacgctctctgggtgatgtattgcctgccgaactgccggtgccgcttcgtgagcttaacgatccggcacgctgtgaggcggccttgttgccctacctggcctggacgcgctcggtggaccgctgggacccggactggagcgacgaggccaagcgcaatgcggtagcgacgtccttcgtcctgcaccagcgcaaaggcacgctgaccgcgttgcgccaagtggtcgagccgatcggtgcgctgagcgaggtcaccgaatggtggcagcgaagcccgaccggcgtgccggggaccttcgagatcaccgtggacgtcagcgaccgtggcatcgacgaaggcaccgtactggagctggagcgc…	MSSRLLPPNRSSLERSLGDVLPAELPVPLRELNDPARCEAALLPYLAWTRSVDRWDPDWSDEAKRNAVATSFVLHQRKGTLTALRQVVEPIGALSEVTEWWQRSPTGVPGTFEITVDVSDRGIDEGTVLELERLLDDVRPVSRHLTRLDLRITPVIRSRHGLAVTDGDTLEIFPWKQ
ORF12	Tail fiber protein H, putative	6044	8152	+	atgacgaccaatactccgaaatacggtggcctgctcaccgacataggtgccgctgcgctggctgcggccagcgcagcaggcaagaaatggcagccgactcatatgctgatcggcgatgctggcggcgcaccgggtgctactccggatccgatacccgcagccacgcagacgaaactgatcaaccagcgctaccgggcgcagctcaatcgcttgttcgtgtcggacaagaacatcaatactctggttgccgaggtggtgctaccagttgaggtaggtggcttctggatccgcgagatcggcctgcaggatgccgacggcaagttcgtcgcggtatccaactgcccgcccagctacaaggcagcaatggaaagtggcagtgcgcggacccagaccattcgg…	MTTNTPKYGGLLTDIGAAALAAASAAGKKWQPTHMLIGDAGGAPGATPDPIPAATQTKLINQRYRAQLNRLFVSDKNINTLVAEVVLPVEVGGFWIREIGLQDADGKFVAVSNCPPSYKAAMESGSARTQTIRVNIALSGLENVQLLIDNGIIYATQDWVKEKVAADFKGRKILAGNGLVGGGDLSADRSIGLAPSGVTAGSYRSVTVNANGVVTQGSNPSTLAGYAIGDAYTKADTDGKLAQKANKATTLAGYGITDALRVDGNAVSSSRLAAPRSLAASGDASWSVTFDGSGNVSAPLSLSATGVAAGSYPKVTVDTKGRVTAGMALAATDIPGLDASKLVSGVLAEQRLPVFARGLATAVSTTSDPNTATVPLMLTNHANGPVAGRYFYIQSMFYP…
ORF13	Tail fiber assembly protein	8161	8601	+	atgatttttttccatgccgccactggcggtttctattcgaaggatgtccacggcgaccgcatgcccatcgacgcgcggatgtatcccctcgaggaagctgaatacctggcgctgttggtagcccagagcgagggcaagcagatcgtcgccgacgccgccggccgtccgttctgtatcgacccgccggccccggcagaagaggtcctggcccaccgtgagcgcatctggcgcgatcgccagttgacgcttactgatggccccatcgcccgtcaccgggatgagctcgacctgggcaagattacgaccctgaaccaggcgcaactgctcgaactcacgctgtaccgcgccagccttcgagactggccggcatccgcggcgtttcctgatttaggcgcaaga…	MIFFHAATGGFYSKDVHGDRMPIDARMYPLEEAEYLALLVAQSEGKQIVADAAGRPFCIDPPAPAEEVLAHRERIWRDRQLTLTDGPIARHRDELDLGKITTLNQAQLLELTLYRASLRDWPASAAFPDLGARPEPPLWLEPLITP
ORF14	pyocin R2_PP, tail sheath protein	8644	9804	+	atgagtttcttccacggcgttacggtaaccaacgtcgatatcggtgcgcgcaccatcgcgctgccggccagctccgtcatcggcctctgcgatgtgttcacgccgggggcgcaggcaagcgccaagcccaacgttccggtgctgctcaccagcaagaaggacgccgccgcggcgttcggcatcggctcgtcgatctatctggcctgcgaggccatctataaccgtgcccaggccgtgatcgtggcggtgggcgtggaagccgcggagactcccgaggcccaggccagcgccgtcataggtggtgtcagcgccgccggcgagcgcaccggactgcaggctctgctagacggcaagagccgcttcaatgctcagccgcgtctactagttgcgccgggtcat…	MSFFHGVTVTNVDIGARTIALPASSVIGLCDVFTPGAQASAKPNVPVLLTSKKDAAAAFGIGSSIYLACEAIYNRAQAVIVAVGVEAAETPEAQASAVIGGVSAAGERTGLQALLDGKSRFNAQPRLLVAPGHSAQQAVATAMDGLAEKLRAIAILDGPNSTDEAAVAYAKNFGSKRLFMVDPGVQVWDSATNAARNAPASAYAAGLFAWTDAEYGFWSSPSNKEIKGITGTSRPVEFLDGDETCRANLLNNANIATIIRDDGYRLWGNRTLSSDSKWAFVTRVRTMDLVMDAILAGHKWAVDRGITKTYVKDVTEGLRAFMRDLKNQGAVINFEVYADPDLNSASQLAQGKVYWNIRFTDVPPAENPNFRVEVTDQWLTEVLDVA
ORF15	Major tail tube protein	9817	10320	+	atgattccgcaaaccctgaccaataccaacctgttcatcgacggcgtgagcttcgccggtgacgtgccatccctgaccctgcccaagctggctgtgaagaccgagcaataccgtgccggcggcatggatgcgccggtatccatcgacatgggcctggaggcgatggaggccaagttctccaccaacggtgcccgccgagaagcactgaatttcttcggcctggccgaccagagcgctttcaatggcgtgttccgcggctccttcaagggccagaagggcgccagcgtgccagtggtggctaccctgcgcggcctgctcaaggaggtcgacccgggcgactggaaggccggcgagaaagccgagttcaagtacgccgttgcggtcagctactacaagctg…	MIPQTLTNTNLFIDGVSFAGDVPSLTLPKLAVKTEQYRAGGMDAPVSIDMGLEAMEAKFSTNGARREALNFFGLADQSAFNGVFRGSFKGQKGASVPVVATLRGLLKEVDPGDWKAGEKAEFKYAVAVSYYKLEVDGREVYEIDPVNGVRAINGVDQLAGMRNDLGL
ORF16	Phage tail assembly protein	10335	10679	+	atgacccaagagaatcgactgccgggctggctgacgctggatgccgacgccgccctcgttcgtctctcgcgtccggcacagtgcaacggggtcagcgtcgacacgctgaccctgcgtgcacccaccgtgcgtgatatccgcctggccggcaaggtggccggcgacgatgccgaggagcgcgaactgcaactgttcgcctcgctggcgcaggtcagccgccaggacctggaggggctgaagctgagcgactaccagcggctgcaaggcgcctactttcgcctggtgcaagacgacacggacgacaccttcgcgtatgcgtcaactggcgaggcgcctggccattga	MTQENRLPGWLTLDADAALVRLSRPAQCNGVSVDTLTLRAPTVRDIRLAGKVAGDDAEERELQLFASLAQVSRQDLEGLKLSDYQRLQGAYFRLVQDDTDDTFAYASTGEAPGH
ORF17	Phage tail tape measure protein	10849	13086	+	atgagtaaagacatggacctggtggtctccatcggcggcatcgccgacccctccttgggcaaggcattcgagaccgtcaaggcacggctcgacagtctccaggaacgttcccgccaggcgtccagcctgagggatgtgctgggagacgccatacgcctggagcgagaactcgccgatatgcgcaaggtcgggcaccgcggcgttgctgagcatgcccggcagcttggcgaacgccaggagcaactgaagcgactcggcatcgaggccagggccgcgggcgatgcctacgctcgactgggcgagatacagcgtggcctggatatgcaggtccgcggcctgcaacggctggagcaggccagccaggcaatgccattggctagcgcattttccggactggtc…	MSKDMDLVVSIGGIADPSLGKAFETVKARLDSLQERSRQASSLRDVLGDAIRLERELADMRKVGHRGVAEHARQLGERQEQLKRLGIEARAAGDAYARLGEIQRGLDMQVRGLQRLEQASQAMPLASAFSGLVVEASKTAAGYQARLRDLAIRNGLDAGREPALASLIQDSASQSGLGRTATLDMLEHLNATGMGFAAAQMNLGLAGRFGFGQGIASAEAAGLVRALQLAQGSDSPEQLSASLDRLVVLGKGRVGSEALARRLPALLSALGNAGEATAGDVGALGALLEIQAKNTTPDKADVRMKAWLEFVSSGSLKRAYGQNYDRDLEALRKDGASLLEANLELAARYRDKGGKLSAGAASPALEAYRASRGEFQGLLETQQSSVGSSERDAQRRKGM…
ORF18	pyocin R2_PP, tail formation protein U	13096	13968	+	atggcatatctggaacaattgcaggccggcctgaggtacctgggtcgcgccggcgagtccggacgcaagagtctggacaaggtggtcgctccggtgaacggcgcgatcagcgagatccgcggcgcagccgcggagctggagaacctgcccggcgtatcgccggaaatggctgcccggctgcagcgtgccatgcgcggcatcggccaggcgcagggcaaggtgaaccgcgtggtctccacctatgaccgggcgagccgggcgttgcttggtatcgacgaacgcctggatgcgctgaaggtccaggtgaacagtgccgcgcaggcggtcggcaaggtcgctggcgacatcagtccgacgctggcgggggtgctgccgtcgtggctgctggcaccctcggcg…	MAYLEQLQAGLRYLGRAGESGRKSLDKVVAPVNGAISEIRGAAAELENLPGVSPEMAARLQRAMRGIGQAQGKVNRVVSTYDRASRALLGIDERLDALKVQVNSAAQAVGKVAGDISPTLAGVLPSWLLAPSATPPSEAAAPLPHLLVLQPLTANAQPFYFNLNTAAFDALQRNSAYNWSGQVRLGRRPALQSVGMGEESILLKGAVFPLRRQVGNQEKVVGLEQLEALRRLAERREPLILSSGYGEVQMGLWCLVRISENQSALLGNGAPRKQTFDLEFKRYGDDLPNR
ORF19	pyocin R2_PP, tail protein X	13943	14149	+	atggcgacgacctgccgaaccgctgacggcgacatgctggacagcctctgctaccacgtctatggccatctgttgggctgcgtcgaggcgaccctcgacgccaatcccgggctggccgatgagcagcagccattccgcgccggcttgctgatcagtttccctgacatgccggtggtcaatgtcgaacaggtgcgcctgtgggattga	MATTCRTADGDMLDSLCYHVYGHLLGCVEATLDANPGLADEQQPFRAGLLISFPDMPVVNVEQVRLWD
ORF20	pyocin R2_PP, tail formation protein D	14207	15196	+	gtgcaaccgagtttccgtatcgttgccgacggcaccgacgtcacccagcggctgaatgaccgcctgctcaagctgaccttgctggacaagccgggcatggagtccgacagcctgatcttgaggctcgacgatcgcgatggacaggtggccttacccaggcgcggtgcggtgctggaggttcatctcggctatgccggcgagccactgatgcgcatgggacgctttaccgtggacaccttgcagtgggctggtccgccggactgcctgaccgttactgccaaggccggcgacatgcgcggcagtggcaagacgatacgcagcggcggttgggagggcactaccctggctcaggtctgccgcgatgttggcgcacgcaacggctggcgcgtggagtgtccg…	MQPSFRIVADGTDVTQRLNDRLLKLTLLDKPGMESDSLILRLDDRDGQVALPRRGAVLEVHLGYAGEPLMRMGRFTVDTLQWAGPPDCLTVTAKAGDMRGSGKTIRSGGWEGTTLAQVCRDVGARNGWRVECPLQVAIARVDQVNESDYHFVTRLARQYDCTAKLAEGMLMVLPRQSGQSATGRRIEPLVLGRADVGSFDVTFDDRSLMRTVKTRYQLPGSGEVKSVELKNPKAPATAMGEHVDRHLYASRGEAEQAAKARLASFSRSSASVRLELPGRGDLFAERSLLLQGFKAGIDGEFLIDSVEHTYSSSGWTTVVQCNGGRGGKG
ORF21	Glycoside hydrolase family 19	15229	15858	+	atgaaactgaccgagcagcaattgctgcgcatttttcccaacgcccgcctcgtcgcgggcgttttcgttgcggcgttgcaacgggccatggacgagagggagatcgacacaccggcgcggcgtgccgcgtttctcgcccaggtcggccacgaaagcagccagttgacccggctggtggagaacctcaactacagtgcccaaggcttggcggcgacctggccgagccgctatctcggccccgacgggcagcccaacgcgttggccttgcggctggcgcgcaatccgcaggcgattgccgacaacacctacgccacgcgcaacggcaatggcgacgaagcgtccggcgatggctggcgcttccgtgggcgtggcttgctacagatcaccgggcgtgccaac…	MKLTEQQLLRIFPNARLVAGVFVAALQRAMDEREIDTPARRAAFLAQVGHESSQLTRLVENLNYSAQGLAATWPSRYLGPDGQPNALALRLARNPQAIADNTYATRNGNGDEASGDGWRFRGRGLLQITGRANYRLVGEALGEPLEAEPWRLEQPVPAARSAAWWWAGHGLNELADRGEFAAITRRINGGLNGQAERLALWQRARAVLS
ORF22	Hypothetical protein	15855	16217	+	atgagccggctcgctctgctcctgccggccgtgttgctggtcctgctggccggcgccttgctcggcggcggcctggttgcccgccactatcgtccgcaactggaggaggccctgggccaactcactgccagccgcgtcgccagcggccagctcgaggctttgctcgatgagcagcagcgagcgctggcggcggtgcgggcgagcgccgagaggcgcgcgaaggacgtcgagcaggcactcggcgaggccagggcgcaggccgcggagcagtatgccgcggccgtgcgtctgctccgggaacccgacattggcacggactgccaggcggcaggtgcggcgatcgaccgggagctgggactatga	MSRLALLLPAVLLVLLAGALLGGGLVARHYRPQLEEALGQLTASRVASGQLEALLDEQQRALAAVRASAERRAKDVEQALGEARAQAAEQYAAAVRLLREPDIGTDCQAAGAAIDRELGL
ORF23	Lipoprotein	16214	16471	+	atgactcgtctcctgctggggctttgtctgcttttcgcgggctgcgcagcctcaccgacgacacctcgccccgtgcgcgtcgaggttcccctggcagtgccctgccgtgtacctgacgtgcgcccgccgagctgggccggcgccacgctgaaggccggcgattcgctgcaggccaaggttcgcgcattgctcgccgagcgccgccagcggcagggctacgaactcgaattgcaggcggcgttgcgtgcctgccgctaa	MSRLALLLPAVLLVLLAGALLGGGLVARHYRPQLEEALGQLTASRVASGQLEALLDEQQRALAAVRASAERRAKDVEQALGEARAQAAEQYAAAVRLLREPDIGTDCQAAGAAIDRELGL
Sequences and annotation of the pyocin cluster 4-71_pyoR5. Start, stop and the strand for each gene are also shown.

## Sheet: 4-79_pyoR5
Position	Protein function	Start	Stop	Strand	Nucleotide sequence	Amino acid (AA) sequence
ORF01	Pyocin activator protein PrtN	315	1	-	gtgcagccaaccatcgcccctaccactccaattccacgccaggaaaccgtggaattggtctaccgcatcttcggcgacgtcctggtgccgctggagcaggtccgcgaacgctggtttcgcaacctgaacaaggaaaacttcagcaaggccctggcatgcgggcggatcgccctgccagtgacgaccctcgacgatagccacaaggccatgcagttcgtggccctcgatcacctcgccgcctacgtcgaccagcgcgcgaaccaagccggaagcgcccgtcgagcacagccaggcgcggacagcatcgcatcctga	MQPTIAPTTPIPRQETVELVYRIFGDVLVPLEQVRERWFRNLNKENFSKALACGRIALPVTTLDDSHKAMQFVALDHLAAYVDQRANQAGSARRAQPGADSIAS
ORF02	HTH-type transcriptional regulator PrtR	1185	415	-	atggacaagagcacccagatcccgcccgacagcttcgccgctcgcctcaagcaggccatggcgatgcgcaacctgaagcaggaaaccctcgccgaagcggcaggggtttcgcagaacaccattcacaagctgacctcgggcaaggcccagagcacccgcaagctgatcgagatcgcggcggccctgggcgtttcgccggtctggctgcagaccggcgaaggcactccagccgcgcgcagtgccgtgtccgtggccgatggcagcccattggtgctggaaccgctgcatccgtgggacagcgacacaccgctggacgaagacgaagtggaactgccgctgtacaaggaagtggagatgtccgccggcgccggacgcactgcggtacgcgagatagagggg…	MDKSTQIPPDSFAARLKQAMAMRNLKQETLAEAAGVSQNTIHKLTSGKAQSTRKLIEIAAALGVSPVWLQTGEGTPAARSAVSVADGSPLVLEPLHPWDSDTPLDEDEVELPLYKEVEMSAGAGRTAVREIEGRKLRFSYATLRASGVDPSAAICAQLTGNSMEPLIMDGSTIGVDTATTHITDGEIYALEHDGMLRVKFVYRLPGGGIRLRSFNREEYPDEEYSPEDMRSRQISMIGWVFWWSTVRHRRAPSLVR
ORF03	Hypothetical protein	1440	1270	-	atggacggcgctccggccctccagatgccggagcgctttcccgtggccccggcacccaagcagtcggcacctgcatcgtcggtcgccgacaaccgggtgtgtccctgcacccatgtgaaatctctgaaaggcgggtgggaagttgtggaactcaccccttccgctttctga	MDGAPALQMPERFPVAPAPKQSAPASSVADNRVCPCTHVKSLKGGWEVVELTPSAF
ORF04	Repressor, PtrB	1643	1843	+	atggctgaccttgccgatcacgccaacgaactggtcctggctcgcctcgacggcctcctggcggcgcgcccggcgctggccatccgcgagtccgcggaagactgcgaggactgcggcgagcccattccccaggcgcgccgtcgggcggcaccgggttgcagtcgctgcatcgactgccaggaccgccacgagcgccgttga	MADLADHANELVLARLDGLLAARPALAIRESAEDCEDCGEPIPQARRRAAPGCSRCIDCQDRHERR
ORF05	Antiterminator Q protein; RNA polymerase	1891	2250	+	gtgatcaaagccatcgatgaaatgctcaagctctgggccgaggaaatgcacgcgccaggcagcaacggaggcggctacgccggcggcaacctgatcgccatgctgatcgccagcaagggcgaggtggtccgcggccaccgtggcagccgggtgatcctcgaccgtgtggcggaggtcgatcgcctggtaaatcgcctacccgaggaactgaagaccgtggtggtggagcactatctcaatcgcgacagcttccccgagcagaagtaccgtcactgcggttgcagccgcaacaccttctatctgcgcctgcatgtggcgcaccagggtatccaggacggcctgctgcgacgggcggcctga	MIKAIDEMLKLWAEEMHAPGSNGGGYAGGNLIAMLIASKGEVVRGHRGSRVILDRVAEVDRLVNRLPEELKTVVVEHYLNRDSFPEQKYRHCGCSRNTFYLRLHVAHQGIQDGLLRRAA
ORF06	Pyocin R2, holin	2709	3062	+	atgggcaacgaaccgcagacactgacggaaatgccgctctgggtactgatcctgctcgccgcgctgggcggcgtcagcggcgagatgtggcgtgccgacaaggccggtctcggcggctgggccttgttgcggcgcctggcgctgcgctccggcgcgtcgatcgtctgcggcgtggcggtgatgctgctggcgttggcttgcggcgccgcgctgctgttcgccgcggcgctgggcagcctgaccgccgcggccggcgcggagatcgccgtcggtctctacgaacgctgggccgcccggcgcctgggggtttgcgagctgcccgaggaacagtcgggcgaccgtggcccgcattga	MGNEPQTLTEMPLWVLILLAALGGVSGEMWRADKAGLGGWALLRRLALRSGASIVCGVAVMLLALACGAALLFAAALGSLTAAAGAEIAVGLYERWAARRLGVCELPEEQSGDRGPH
ORF07	Collar PA0615; bacteriocin, pyocin	3084	3599	+	atgcctgaacaggctgttacgctcgaggctctgtacgcggccatcgagcaggtactgcgtgagcgtctgccggaggcgcagttgatcggcttctggccaggcgtgccggaaaataccccggcggtttccctggaaatggccgagctgctgcccgagcgcgatcccggtaccggcgagagcgccctgctgtgccgcctgcaggcgcggataatggtgccgcctggtgccgatcgccaggcggtatccattgcttgcggaatcgttcggacattgcgcgagcagacctggaacctgtctctggaaccggcgcgcttcgtacgctcggccgtcgacggcagtcgcgaggagctgaagagcctgcgtgtctggctggtcgagtggacgcagtcgctgcgtctc…	MPEQAVTLEALYAAIEQVLRERLPEAQLIGFWPGVPENTPAVSLEMAELLPERDPGTGESALLCRLQARIMVPPGADRQAVSIACGIVRTLREQTWNLSLEPARFVRSAVDGSREELKSLRVWLVEWTQSLRLGDPEWAWEDQPPGSLMLGFDPQTGPGHEPDYFAPEALA
ORF08	pyocin R2_PP, baseplate assembly protein V	3596	4153	+	atgagctatgtcagtgcggagcatgaccgcatgctcgccgcgatgatcctgccctgtgtggtggtcgccgtggacctggcagcggcgcgggtacgggtgcgctccggcgactggaccagcggctggctgcgctggcactccctggcagccggcaaggttcgccactggcgtgcgccgagcataggcgaacagggggtactgctcagtccgtcgggcggagtgtcaatgggtacctttattcccggtctgtacggcgatgcgggcacggcgccggacaacagcgccagcagtgagacctggcgtttcgacgacggcgcctcgttgagttacgactgggctgcgcatcgctaccgcgtcgagctgcccagcggcaccgtggaagtgagggtcggcgccagc…	MSYVSAEHDRMLAAMILPCVVVAVDLAAARVRVRSGDWTSGWLRWHSLAAGKVRHWRAPSIGEQGVLLSPSGGVSMGTFIPGLYGDAGTAPDNSASSETWRFDDGASLSYDWAAHRYRVELPSGTVEVRVGASEVRVSDGAVSLKAPKISLEGPVEIAGTLTVSGDILGGGSIIDTAGNSNHHTH
ORF09	pyocin R2_PP, baseplate assembly protein W	4306	4632	+	atgatcgggatggatcgccgtagcgggctgcccctgtccggcctggctcatcttaaacagtccgtcgaggacatcctgaccaccccgttgggcagcaggcgcatgcgccccgagtacggcagcaagctgcggcggatggtcgacatgccggtgagcgaaggctggaaaagcgccgtgcaggccgaggtagcccgttccctggggcgctgggaaccgcgcatcgcattgtctgccgtgcgagtcgtcgcagtcgtcgatggccgcgtggatctgctcctgagcggcgtgttcgagggcgagaacatcaatatggaggtctcggcgtga	MIGMDRRSGLPLSGLAHLKQSVEDILTTPLGSRRMRPEYGSKLRRMVDMPVSEGWKSAVQAEVARSLGRWEPRIALSAVRVVAVVDGRVDLLLSGVFEGENINMEVSA
ORF10	pyocin R2_PP, baseplate assembly protein J	4629	5516	+	gtgatcatcgatctttcccagttgccggagccagaggttatcgaaaacctcgatttcgagacgatttaccaggagctgttgggtgacttccgcgaagccatggctggcgaatggacagcggaggtggagtccgatccggttctcaagcttctgcaactggcggcctatcgagaactgctgctgcgggcgcggatcaacgatgcggcgcgggcggtgatgctggcatacgccagcggtgccgatctcgaccagatcggtgccggcttcaatgtgcagcgtttgctgatcaggcccgctcagcccgaggcggtaccgccggtggaggcgcaatacgagagcgacaagtcgctgcgcaatcgcatccagctcgcgttcgagcagctatccgtcgcaggaccg…	MIIDLSQLPEPEVIENLDFETIYQELLGDFREAMAGEWTAEVESDPVLKLLQLAAYRELLLRARINDAARAVMLAYASGADLDQIGAGFNVQRLLIRPAQPEAVPPVEAQYESDKSLRNRIQLAFEQLSVAGPRNAYIAHALGADGRVADASATSPAPCEVLISVLGVEGNGQAPEAVLQAVRLALNAEDVRPVADRVTVRSAGIVPYQVKAQLYLFPGPEAELIRAAAEASLRDYISAQRRLGRDIRRSALFATLHVEGVQRVELQEPAADVVLDETQAAYCTGYAITLGGVDE
ORF11	pyocin R2_PP, tail formation protein I	5509	6042	+	atgagtagccgactgctgccgccaaacaggagttcactggaacgctctctgggtgatgtattgcctgccgaactgccggtgccgcttcgtgagcttaacgatccggcacgctgtgaggcggccttgttgccctacctggcctggacgcgctcggtggaccgctgggacccggactggagcgacgaggccaagcgcaatgcggtagcgacgtccttcgtcctgcaccagcgcaaaggcacgctgaccgcgttgcgccaagtggtcgagccgatcggtgcgctgagcgaggtcaccgaatggtggcagcgaagcccgaccggcgtgccggggaccttcgagatcaccgtggacgtcagcgaccgtggcatcgacgaaggcaccgtactggagctggagcgc…	MSSRLLPPNRSSLERSLGDVLPAELPVPLRELNDPARCEAALLPYLAWTRSVDRWDPDWSDEAKRNAVATSFVLHQRKGTLTALRQVVEPIGALSEVTEWWQRSPTGVPGTFEITVDVSDRGIDEGTVLELERLLDDVRPVSRHLTRLDLRITPVIRSRHGLAVTDGDTLEIFPWKQ
ORF12	Tail fiber protein H, putative	6044	8152	+	atgacgaccaatactccgaaatacggtggcctgctcaccgacataggtgccgctgcgctggctgcggccagcgcagcaggcaagaaatggcagccgactcatatgctgatcggcgatgctggcggcgcaccgggtgctactccggatccgatacccgcagccacgcagacgaaactgatcaaccagcgctaccgggcgcagctcaatcgcttgttcgtgtcggacaagaacatcaatactctggttgccgaggtggtgctaccagttgaggtaggtggcttctggatccgcgagatcggcctgcaggatgccgacggcaagttcgtcgcggtatccaactgcccgcccagctacaaggcagcaatggaaagtggcagtgcgcggacccagaccattcgg…	MTTNTPKYGGLLTDIGAAALAAASAAGKKWQPTHMLIGDAGGAPGATPDPIPAATQTKLINQRYRAQLNRLFVSDKNINTLVAEVVLPVEVGGFWIREIGLQDADGKFVAVSNCPPSYKAAMESGSARTQTIRVNIALSGLENVQLLIDNGIIYATQDWVKEKVAADFKGRKILAGNGLVGGGDLSADRSIGLAPSGVTAGSYRSVTVNANGVVTQGSNPSTLAGYAIGDAYTKADTDGKLAQKANKATTLAGYGITDALRVDGNAVSSSRLAAPRSLAASGDASWSVTFDGSGNVSAPLSLSATGVAAGSYPKVTVDTKGRVTAGMALAATDIPGLDASKLVSGVLAEQRLPVFARGLATAVSTTSDPNTATVPLMLTNHANGPVAGRYFYIQSMFYP…
ORF13	Tail fiber assembly protein	8161	8601	+	atgatttttttccatgccgccactggcggtttctattcgaaggatgtccacggcgaccgcatgcccatcgacgcgcggatgtatcccctcgaggaagctgaatacctggcgctgttggtagcccagagcgagggcaagcagatcgtcgccgacgccgccggccgtccgttctgtatcgacccgccggccccggcagaagaggtcctggcccaccgtgagcgcatctggcgcgatcgccagttgacgcttactgatggccccatcgcccgtcaccgggatgagctcgacctgggcaagattacgaccctgaaccaggcgcaactgctcgaactcacgctgtaccgcgccagccttcgagactggccggcatccgcggcgtttcctgatttaggcgcaaga…	MIFFHAATGGFYSKDVHGDRMPIDARMYPLEEAEYLALLVAQSEGKQIVADAAGRPFCIDPPAPAEEVLAHRERIWRDRQLTLTDGPIARHRDELDLGKITTLNQAQLLELTLYRASLRDWPASAAFPDLGARPEPPLWLEPLITP
ORF14	pyocin R2_PP, tail sheath protein	8644	9804	+	atgagtttcttccacggcgttacggtaaccaacgtcgatatcggtgcgcgcaccatcgcgctgccggccagctccgtcatcggcctctgcgatgtgttcacgccgggggcgcaggcaagcgccaagcccaacgttccggtgctgctcaccagcaagaaggacgccgccgcggcgttcggcatcggctcgtcgatctatctggcctgcgaggccatctataaccgtgcccaggccgtgatcgtggcggtgggcgtggaagccgcggagactcccgaggcccaggccagcgccgtcataggtggtgtcagcgccgccggcgagcgcaccggactgcaggctctgctagacggcaagagccgcttcaatgctcagccgcgtctactagttgcgccgggtcat…	MSFFHGVTVTNVDIGARTIALPASSVIGLCDVFTPGAQASAKPNVPVLLTSKKDAAAAFGIGSSIYLACEAIYNRAQAVIVAVGVEAAETPEAQASAVIGGVSAAGERTGLQALLDGKSRFNAQPRLLVAPGHSAQQAVATAMDGLAEKLRAIAILDGPNSTDEAAVAYAKNFGSKRLFMVDPGVQVWDSATNAARNAPASAYAAGLFAWTDAEYGFWSSPSNKEIKGITGTSRPVEFLDGDETCRANLLNNANIATIIRDDGYRLWGNRTLSSDSKWAFVTRVRTMDLVMDAILAGHKWAVDRGITKTYVKDVTEGLRAFMRDLKNQGAVINFEVYADPDLNSASQLAQGKVYWNIRFTDVPPAENPNFRVEVTDQWLTEVLDVA
ORF15	Major tail tube protein	9817	10320	+	atgattccgcaaaccctgaccaataccaacctgttcatcgacggcgtgagcttcgccggtgacgtgccatccctgaccctgcccaagctggctgtgaagaccgagcaataccgtgccggcggcatggatgcgccggtatccatcgacatgggcctggaggcgatggaggccaagttctccaccaacggtgcccgccgagaagcactgaatttcttcggcctggccgaccagagcgctttcaatggcgtgttccgcggctccttcaagggccagaagggcgccagcgtgccagtggtggctaccctgcgcggcctgctcaaggaggtcgacccgggcgactggaaggccggcgagaaagccgagttcaagtacgccgttgcggtcagctactacaagctg…	MIPQTLTNTNLFIDGVSFAGDVPSLTLPKLAVKTEQYRAGGMDAPVSIDMGLEAMEAKFSTNGARREALNFFGLADQSAFNGVFRGSFKGQKGASVPVVATLRGLLKEVDPGDWKAGEKAEFKYAVAVSYYKLEVDGREVYEIDPVNGVRAINGVDQLAGMRNDLGL
ORF16	Phage tail assembly protein	10335	10679	+	atgacccaagagaatcgactgccgggctggctgacgctggatgccgacgccgccctcgttcgtctctcgcgtccggcacagtgcaacggggtcagcgtcgacacgctgaccctgcgtgcacccaccgtgcgtgatatccgcctggccggcaaggtggccggcgacgatgccgaggagcgcgaactgcaactgttcgcctcgctggcgcaggtcagccgccaggacctggaggggctgaagctgagcgactaccagcggctgcaaggcgcctactttcgcctggtgcaagacgacacggacgacaccttcgcgtatgcgtcaactggcgaggcgcctggccattga	MTQENRLPGWLTLDADAALVRLSRPAQCNGVSVDTLTLRAPTVRDIRLAGKVAGDDAEERELQLFASLAQVSRQDLEGLKLSDYQRLQGAYFRLVQDDTDDTFAYASTGEAPGH
ORF17	Phage tail tape measure protein	10849	13086	+	atgagtaaagacatggacctggtggtctccatcggcggcatcgccgacccctccttgggcaaggcattcgagaccgtcaaggcacggctcgacagtctccaggaacgttcccgccaggcgtccagcctgagggatgtgctgggagacgccatacgcctggagcgagaactcgccgatatgcgcaaggtcgggcaccgcggcgttgctgagcatgcccggcagcttggcgaacgccaggagcaactgaagcgactcggcatcgaggccagggccgcgggcgatgcctacgctcgactgggcgagatacagcgtggcctggatatgcaggtccgcggcctgcaacggctggagcaggccagccaggcaatgccattggctagcgcattttccggactggtc…	MSKDMDLVVSIGGIADPSLGKAFETVKARLDSLQERSRQASSLRDVLGDAIRLERELADMRKVGHRGVAEHARQLGERQEQLKRLGIEARAAGDAYARLGEIQRGLDMQVRGLQRLEQASQAMPLASAFSGLVVEASKTAAGYQARLRDLAIRNGLDAGREPALASLIQDSASQSGLGRTATLDMLEHLNATGMGFAAAQMNLGLAGRFGFGQGIASAEAAGLVRALQLAQGSDSPEQLSASLDRLVVLGKGRVGSEALARRLPALLSALGNAGEATAGDVGALGALLEIQAKNTTPDKADVRMKAWLEFVSSGSLKRAYGQNYDRDLEALRKDGASLLEANLELAARYRDKGGKLSAGAASPALEAYRASRGEFQGLLETQQSSVGSSERDAQRRKGM…
ORF18	pyocin R2_PP, tail formation protein U	13096	13968	+	atggcatatctggaacaattgcaggccggcctgaggtacctgggtcgcgccggcgagtccggacgcaagagtctggacaaggtggtcgctccggtgaacggcgcgatcagcgagatccgcggcgcagccgcggagctggagaacctgcccggcgtatcgccggaaatggctgcccggctgcagcgtgccatgcgcggcatcggccaggcgcagggcaaggtgaaccgcgtggtctccacctatgaccgggcgagccgggcgttgcttggtatcgacgaacgcctggatgcgctgaaggtccaggtgaacagtgccgcgcaggcggtcggcaaggtcgctggcgacatcagtccgacgctggcgggggtgctgccgtcgtggctgctggcaccctcggcg…	MAYLEQLQAGLRYLGRAGESGRKSLDKVVAPVNGAISEIRGAAAELENLPGVSPEMAARLQRAMRGIGQAQGKVNRVVSTYDRASRALLGIDERLDALKVQVNSAAQAVGKVAGDISPTLAGVLPSWLLAPSATPPSEAAAPLPHLLVLQPLTANAQPFYFNLNTAAFDALQRNSAYNWSGQVRLGRRPALQSVGMGEESILLKGAVFPLRRQVGNQEKVVGLEQLEALRRLAERREPLILSSGYGEVQMGLWCLVRISENQSALLGNGAPRKQTFDLEFKRYGDDLPNR
ORF19	pyocin R2_PP, tail protein X	13943	14149	+	atggcgacgacctgccgaaccgctgacggcgacatgctggacagcctctgctaccacgtctatggccatctgttgggctgcgtcgaggcgaccctcgacgccaatcccgggctggccgatgagcagcagccattccgcgccggcttgctgatcagtttccctgacatgccggtggtcaatgtcgaacaggtgcgcctgtgggattga	MATTCRTADGDMLDSLCYHVYGHLLGCVEATLDANPGLADEQQPFRAGLLISFPDMPVVNVEQVRLWD
ORF20	pyocin R2_PP, tail formation protein D	14207	15196	+	gtgcaaccgagtttccgtatcgttgccgacggcaccgacgtcacccagcggctgaatgaccgcctgctcaagctgaccttgctggacaagccgggcatggagtccgacagcctgatcttgaggctcgacgatcgcgatggacaggtggccttacccaggcgcggtgcggtgctggaggttcatctcggctatgccggcgagccactgatgcgcatgggacgctttaccgtggacaccttgcagtgggctggtccgccggactgcctgaccgttactgccaaggccggcgacatgcgcggcagtggcaagacgatacgcagcggcggttgggagggcactaccctggctcaggtctgccgcgatgttggcgcacgcaacggctggcgcgtggagtgtccg…	MQPSFRIVADGTDVTQRLNDRLLKLTLLDKPGMESDSLILRLDDRDGQVALPRRGAVLEVHLGYAGEPLMRMGRFTVDTLQWAGPPDCLTVTAKAGDMRGSGKTIRSGGWEGTTLAQVCRDVGARNGWRVECPLQVAIARVDQVNESDYHFVTRLARQYDCTAKLAEGMLMVLPRQSGQSATGRRIEPLVLGRADVGSFDVTFDDRSLMRTVKTRYQLPGSGEVKSVELKNPKAPATAMGEHVDRHLYASRGEAEQAAKARLASFSRSSASVRLELPGRGDLFAERSLLLQGFKAGIDGEFLIDSVEHTYSSSGWTTVVQCNGGRGGKG
ORF21	Glycoside hydrolase family 19	15229	15858	+	atgaaactgaccgagcagcaattgctgcgcatttttcccaacgcccgcctcgtcgcgggcgttttcgttgcggcgttgcaacgggccatggacgagagggagatcgacacaccggcgcggcgtgccgcgtttctcgcccaggtcggccacgaaagcagccagttgacccggctggtggagaacctcaactacagtgcccaaggcttggcggcgacctggccgagccgctatctcggccccgacgggcagcccaacgcgttggccttgcggctggcgcgcaatccgcaggcgattgccgacaacacctacgccacgcgcaacggcaatggcgacgaagcgtccggcgatggctggcgcttccgtgggcgtggcttgctacagatcaccgggcgtgccaac…	MKLTEQQLLRIFPNARLVAGVFVAALQRAMDEREIDTPARRAAFLAQVGHESSQLTRLVENLNYSAQGLAATWPSRYLGPDGQPNALALRLARNPQAIADNTYATRNGNGDEASGDGWRFRGRGLLQITGRANYRLVGEALGEPLEAEPWRLEQPVPAARSAAWWWAGHGLNELADRGEFAAITRRINGGLNGQAERLALWQRARAVLS
ORF22	Hypothetical protein	15855	16217	+	atgagccggctcgctctgctcctgccggccgtgttgctggtcctgctggccggcgccttgctcggcggcggcctggttgcccgccactatcgtccgcaactggaggaggccctgggccaactcactgccagccgcgtcgccagcggccagctcgaggctttgctcgatgagcagcagcgagcgctggcggcggtgcgggcgagcgccgagaggcgcgcgaaggacgtcgagcaggcactcggcgaggccagggcgcaggccgcggagcagtatgccgcggccgtgcgtctgctccgggaacccgacattggcacggactgccaggcggcaggtgcggcgatcgaccgggagctgggactatga	MSRLALLLPAVLLVLLAGALLGGGLVARHYRPQLEEALGQLTASRVASGQLEALLDEQQRALAAVRASAERRAKDVEQALGEARAQAAEQYAAAVRLLREPDIGTDCQAAGAAIDRELGL
ORF23	Lipoprotein	16214	16471	+	atgactcgtctcctgctggggctttgtctgcttttcgcgggctgcgcagcctcaccgacgacacctcgccccgtgcgcgtcgaggttcccctggcagtgccctgccgtgtacctgacgtgcgcccgccgagctgggccggcgccacgctgaaggccggcgattcgctgcaggccaaggttcgcgcattgctcgccgagcgccgccagcggcagggctacgaactcgaattgcaggcggcgttgcgtgcctgccgctaa	MTRLLLGLCLLFAGCAASPTTPRPVRVEVPLAVPCRVPDVRPPSWAGATLKAGDSLQAKVRALLAERRQRQGYELELQAALRACR
Sequences and annotation of the pyocin cluster 4-79_pyoR5. Start, stop and the strand for each gene are also shown.

## Sheet: 4-86_pyoR5
Position	Protein function	Start	Stop	Strand	Nucleotide sequence	Amino acid (AA) sequence
ORF01	Pyocin activator protein PrtN	315	1	-	gtgcagccaaccatcgcccctaccactccaattccacgccaggaaaccgtggaattggtctaccgcatcttcggcgacgtcctggtgccgctggagcaggtccgcgaacgctggtttcgcaacctgaacaaggaaaacttcagcaaggccctggcatgcgggcggatcgccctgccagtgacgaccctcgacgatagccacaaggccatgcagttcgtggccctcgatcacctcgccgcctacgtcgaccagcgcgcgaaccaagccggaagcgcccgtcgagcacagccaggcgcggacagcatcgcatcctga	MQPTIAPTTPIPRQETVELVYRIFGDVLVPLEQVRERWFRNLNKENFSKALACGRIALPVTTLDDSHKAMQFVALDHLAAYVDQRANQAGSARRAQPGADSIAS
ORF02	HTH-type transcriptional regulator PrtR	1185	415	-	atggacaagagcacccagatcccgcccgacagcttcgccgctcgcctcaagcaggccatggcgatgcgcaacctgaagcaggaaaccctcgccgaagcggcaggggtttcgcagaacaccattcacaagctgacctcgggcaaggcccagagcacccgcaagctgatcgagatcgcggcggccctgggcgtttcgccggtctggctgcagaccggcgaaggcactccagccgcgcgcagtgccgtgtccgtggccgatggcagcccattggtgctggaaccgctgcatccgtgggacagcgacacaccgctggacgaagacgaagtggaactgccgctgtacaaggaagtggagatgtccgccggcgccggacgcactgcggtacgcgagatagagggg…	MDKSTQIPPDSFAARLKQAMAMRNLKQETLAEAAGVSQNTIHKLTSGKAQSTRKLIEIAAALGVSPVWLQTGEGTPAARSAVSVADGSPLVLEPLHPWDSDTPLDEDEVELPLYKEVEMSAGAGRTAVREIEGRKLRFSYATLRASGVDPSAAICAQLTGNSMEPLIMDGSTIGVDTATTHITDGEIYALEHDGMLRVKFVYRLPGGGIRLRSFNREEYPDEEYSPEDMRSRQISMIGWVFWWSTVRHRRAPSLVR
ORF03	Hypothetical protein	1440	1270	-	atggacggcgctccggccctccagatgccggagcgctttcccgtggccccggcacccaagcagtcggcacctgcatcgtcggtcgccgacaaccgggtgtgtccctgcacccatgtgaaatctctgaaaggcgggtgggaagttgtggaactcaccccttccgctttctga	MDGAPALQMPERFPVAPAPKQSAPASSVADNRVCPCTHVKSLKGGWEVVELTPSAF
ORF04	Repressor, PtrB	1643	1843	+	atggctgaccttgccgatcacgccaacgaactggtcctggctcgcctcgacggcctcctggcggcgcgcccggcgctggccatccgcgagtccgcggaagactgcgaggactgcggcgagcccattccccaggcgcgccgtcgggcggcaccgggttgcagtcgctgcatcgactgccaggaccgccacgagcgccgttga	MADLADHANELVLARLDGLLAARPALAIRESAEDCEDCGEPIPQARRRAAPGCSRCIDCQDRHERR
ORF05	Antiterminator Q protein; RNA polymerase	1891	2250	+	gtgatcaaagccatcgatgaaatgctcaagctctgggccgaggaaatgcacgcgccaggcagcaacggaggcggctacgccggcggcaacctgatcgccatgctgatcgccagcaagggcgaggtggtccgcggccaccgtggcagccgggtgatcctcgaccgtgtggcggaggtcgatcgcctggtaaatcgcctacccgaggaactgaagaccgtggtggtggagcactatctcaatcgcgacagcttccccgagcagaagtaccgtcactgcggttgcagccgcaacaccttctatctgcgcctgcatgtggcgcaccagggtatccaggacggcctgctgcgacgggcggcctga	MIKAIDEMLKLWAEEMHAPGSNGGGYAGGNLIAMLIASKGEVVRGHRGSRVILDRVAEVDRLVNRLPEELKTVVVEHYLNRDSFPEQKYRHCGCSRNTFYLRLHVAHQGIQDGLLRRAA
ORF06	Pyocin R2, holin	2709	3062	+	atgggcaacgaaccgcagacactgacggaaatgccgctctgggtactgatcctgctcgccgcgctgggcggcgtcagcggcgagatgtggcgtgccgacaaggccggtctcggcggctgggccttgttgcggcgcctggcgctgcgctccggcgcgtcgatcgtctgcggcgtggcggtgatgctgctggcgttggcttgcggcgccgcgctgctgttcgccgcggcgctgggcagcctgaccgccgcggccggcgcggagatcgccgtcggtctctacgaacgctgggccgcccggcgcctgggggtttgcgagctgcccgaggaacagtcgggcgaccgtggcccgcattga	MGNEPQTLTEMPLWVLILLAALGGVSGEMWRADKAGLGGWALLRRLALRSGASIVCGVAVMLLALACGAALLFAAALGSLTAAAGAEIAVGLYERWAARRLGVCELPEEQSGDRGPH
ORF07	Collar PA0615; bacteriocin, pyocin	3084	3599	+	atgcctgaacaggctgttacgctcgaggctctgtacgcggccatcgagcaggtactgcgtgagcgtctgccggaggcgcagttgatcggcttctggccaggcgtgccggaaaataccccggcggtttccctggaaatggccgagctgctgcccgagcgcgatcccggtaccggcgagagcgccctgctgtgccgcctgcaggcgcggataatggtgccgcctggtgccgatcgccaggcggtatccattgcttgcggaatcgttcggacattgcgcgagcagacctggaacctgtctctggaaccggcgcgcttcgtacgctcggccgtcgacggcagtcgcgaggagctgaagagcctgcgtgtctggctggtcgagtggacgcagtcgctgcgtctc…	MPEQAVTLEALYAAIEQVLRERLPEAQLIGFWPGVPENTPAVSLEMAELLPERDPGTGESALLCRLQARIMVPPGADRQAVSIACGIVRTLREQTWNLSLEPARFVRSAVDGSREELKSLRVWLVEWTQSLRLGDPEWAWEDQPPGSLMLGFDPQTGPGHEPDYFAPEALA
ORF08	pyocin R2_PP, baseplate assembly protein V	3596	4153	+	atgagctatgtcagtgcggagcatgaccgcatgctcgccgcgatgatcctgccctgtgtggtggtcgccgtggacctggcagcggcgcgggtacgggtgcgctccggcgactggaccagcggctggctgcgctggcactccctggcagccggcaaggttcgccactggcgtgcgccgagcataggcgaacagggggtactgctcagtccgtcgggcggagtgtcaatgggtacctttattcccggtctgtacggcgatgcgggcacggcgccggacaacagcgccagcagtgagacctggcgtttcgacgacggcgcctcgttgagttacgactgggctgcgcatcgctaccgcgtcgagctgcccagcggcaccgtggaagtgagggtcggcgccagc…	MSYVSAEHDRMLAAMILPCVVVAVDLAAARVRVRSGDWTSGWLRWHSLAAGKVRHWRAPSIGEQGVLLSPSGGVSMGTFIPGLYGDAGTAPDNSASSETWRFDDGASLSYDWAAHRYRVELPSGTVEVRVGASEVRVSDGAVSLKAPKISLEGPVEIAGTLTVSGDILGGGSIIDTAGNSNHHTH
ORF09	pyocin R2_PP, baseplate assembly protein W	4306	4632	+	atgatcgggatggatcgccgtagcgggctgcccctgtccggcctggctcatcttaaacagtccgtcgaggacatcctgaccaccccgttgggcagcaggcgcatgcgccccgagtacggcagcaagctgcggcggatggtcgacatgccggtgagcgaaggctggaaaagcgccgtgcaggccgaggtagcccgttccctggggcgctgggaaccgcgcatcgcattgtctgccgtgcgagtcgtcgcagtcgtcgatggccgcgtggatctgctcctgagcggcgtgttcgagggcgagaacatcaatatggaggtctcggcgtga	MIGMDRRSGLPLSGLAHLKQSVEDILTTPLGSRRMRPEYGSKLRRMVDMPVSEGWKSAVQAEVARSLGRWEPRIALSAVRVVAVVDGRVDLLLSGVFEGENINMEVSA
ORF10	pyocin R2_PP, baseplate assembly protein J	4629	5516	+	gtgatcatcgatctttcccagttgccggagccagaggttatcgaaaacctcgatttcgagacgatttaccaggagctgttgggtgacttccgcgaagccatggctggcgaatggacagcggaggtggagtccgatccggttctcaagcttctgcaactggcggcctatcgagaactgctgctgcgggcgcggatcaacgatgcggcgcgggcggtgatgctggcatacgccagcggtgccgatctcgaccagatcggtgccggcttcaatgtgcagcgtttgctgatcaggcccgctcagcccgaggcggtaccgccggtggaggcgcaatacgagagcgacaagtcgctgcgcaatcgcatccagctcgcgttcgagcagctatccgtcgcaggaccg…	MIIDLSQLPEPEVIENLDFETIYQELLGDFREAMAGEWTAEVESDPVLKLLQLAAYRELLLRARINDAARAVMLAYASGADLDQIGAGFNVQRLLIRPAQPEAVPPVEAQYESDKSLRNRIQLAFEQLSVAGPRNAYIAHALGADGRVADASATSPAPCEVLISVLGVEGNGQAPEAVLQAVRLALNAEDVRPVADRVTVRSAGIVPYQVKAQLYLFPGPEAELIRAAAEASLRDYISAQRRLGRDIRRSALFATLHVEGVQRVELQEPAADVVLDETQAAYCTGYAITLGGVDE
ORF11	pyocin R2_PP, tail formation protein I	5509	6042	+	atgagtagccgactgctgccgccaaacaggagttcactggaacgctctctgggtgatgtattgcctgccgaactgccggtgccgcttcgtgagcttaacgatccggcacgctgtgaggcggccttgttgccctacctggcctggacgcgctcggtggaccgctgggacccggactggagcgacgaggccaagcgcaatgcggtagcgacgtccttcgtcctgcaccagcgcaaaggcacgctgaccgcgttgcgccaagtggtcgagccgatcggtgcgctgagcgaggtcaccgaatggtggcagcgaagcccgaccggcgtgccggggaccttcgagatcaccgtggacgtcagcgaccgtggcatcgacgaaggcaccgtactggagctggagcgc…	MSSRLLPPNRSSLERSLGDVLPAELPVPLRELNDPARCEAALLPYLAWTRSVDRWDPDWSDEAKRNAVATSFVLHQRKGTLTALRQVVEPIGALSEVTEWWQRSPTGVPGTFEITVDVSDRGIDEGTVLELERLLDDVRPVSRHLTRLDLRITPVIRSRHGLAVTDGDTLEIFPWKQ
ORF12	Tail fiber protein H, putative	6044	8152	+	atgacgaccaatactccgaaatacggtggcctgctcaccgacataggtgccgctgcgctggctgcggccagcgcagcaggcaagaaatggcagccgactcatatgctgatcggcgatgctggcggcgcaccgggtgctactccggatccgatacccgcagccacgcagacgaaactgatcaaccagcgctaccgggcgcagctcaatcgcttgttcgtgtcggacaagaacatcaatactctggttgccgaggtggtgctaccagttgaggtaggtggcttctggatccgcgagatcggcctgcaggatgccgacggcaagttcgtcgcggtatccaactgcccgcccagctacaaggcagcaatggaaagtggcagtgcgcggacccagaccattcgg…	MTTNTPKYGGLLTDIGAAALAAASAAGKKWQPTHMLIGDAGGAPGATPDPIPAATQTKLINQRYRAQLNRLFVSDKNINTLVAEVVLPVEVGGFWIREIGLQDADGKFVAVSNCPPSYKAAMESGSARTQTIRVNIALSGLENVQLLIDNGIIYATQDWVKEKVAADFKGRKILAGNGLVGGGDLSADRSIGLAPSGVTAGSYRSVTVNANGVVTQGSNPSTLAGYAIGDAYTKADTDGKLAQKANKATTLAGYGITDALRVDGNAVSSSRLAAPRSLAASGDASWSVTFDGSGNVSAPLSLSATGVAAGSYPKVTVDTKGRVTAGMALAATDIPGLDASKLVSGVLAEQRLPVFARGLATAVSTTSDPNTATVPLMLTNHANGPVAGRYFYIQSMFYP…
ORF13	Tail fiber assembly protein	8161	8601	+	atgatttttttccatgccgccactggcggtttctattcgaaggatgtccacggcgaccgcatgcccatcgacgcgcggatgtatcccctcgaggaagctgaatacctggcgctgttggtagcccagagcgagggcaagcagatcgtcgccgacgccgccggccgtccgttctgtatcgacccgccggccccggcagaagaggtcctggcccaccgtgagcgcatctggcgcgatcgccagttgacgcttactgatggccccatcgcccgtcaccgggatgagctcgacctgggcaagattacgaccctgaaccaggcgcaactgctcgaactcacgctgtaccgcgccagccttcgagactggccggcatccgcggcgtttcctgatttaggcgcaaga…	MIFFHAATGGFYSKDVHGDRMPIDARMYPLEEAEYLALLVAQSEGKQIVADAAGRPFCIDPPAPAEEVLAHRERIWRDRQLTLTDGPIARHRDELDLGKITTLNQAQLLELTLYRASLRDWPASAAFPDLGARPEPPLWLEPLITP
ORF14	pyocin R2_PP, tail sheath protein	8644	9804	+	atgagtttcttccacggcgttacggtaaccaacgtcgatatcggtgcgcgcaccatcgcgctgccggccagctccgtcatcggcctctgcgatgtgttcacgccgggggcgcaggcaagcgccaagcccaacgttccggtgctgctcaccagcaagaaggacgccgccgcggcgttcggcatcggctcgtcgatctatctggcctgcgaggccatctataaccgtgcccaggccgtgatcgtggcggtgggcgtggaagccgcggagactcccgaggcccaggccagcgccgtcataggtggtgtcagcgccgccggcgagcgcaccggactgcaggctctgctagacggcaagagccgcttcaatgctcagccgcgtctactagttgcgccgggtcat…	MSFFHGVTVTNVDIGARTIALPASSVIGLCDVFTPGAQASAKPNVPVLLTSKKDAAAAFGIGSSIYLACEAIYNRAQAVIVAVGVEAAETPEAQASAVIGGVSAAGERTGLQALLDGKSRFNAQPRLLVAPGHSAQQAVATAMDGLAEKLRAIAILDGPNSTDEAAVAYAKNFGSKRLFMVDPGVQVWDSATNAARNAPASAYAAGLFAWTDAEYGFWSSPSNKEIKGITGTSRPVEFLDGDETCRANLLNNANIATIIRDDGYRLWGNRTLSSDSKWAFVTRVRTMDLVMDAILAGHKWAVDRGITKTYVKDVTEGLRAFMRDLKNQGAVINFEVYADPDLNSASQLAQGKVYWNIRFTDVPPAENPNFRVEVTDQWLTEVLDVA
ORF15	Major tail tube protein	9817	10320	+	atgattccgcaaaccctgaccaataccaacctgttcatcgacggcgtgagcttcgccggtgacgtgccatccctgaccctgcccaagctggctgtgaagaccgagcaataccgtgccggcggcatggatgcgccggtatccatcgacatgggcctggaggcgatggaggccaagttctccaccaacggtgcccgccgagaagcactgaatttcttcggcctggccgaccagagcgctttcaatggcgtgttccgcggctccttcaagggccagaagggcgccagcgtgccagtggtggctaccctgcgcggcctgctcaaggaggtcgacccgggcgactggaaggccggcgagaaagccgagttcaagtacgccgttgcggtcagctactacaagctg…	MIPQTLTNTNLFIDGVSFAGDVPSLTLPKLAVKTEQYRAGGMDAPVSIDMGLEAMEAKFSTNGARREALNFFGLADQSAFNGVFRGSFKGQKGASVPVVATLRGLLKEVDPGDWKAGEKAEFKYAVAVSYYKLEVDGREVYEIDPVNGVRAINGVDQLAGMRNDLGL
ORF16	Phage tail assembly protein	10335	10679	+	atgacccaagagaatcgactgccgggctggctgacgctggatgccgacgccgccctcgttcgtctctcgcgtccggcacagtgcaacggggtcagcgtcgacacgctgaccctgcgtgcacccaccgtgcgtgatatccgcctggccggcaaggtggccggcgacgatgccgaggagcgcgaactgcaactgttcgcctcgctggcgcaggtcagccgccaggacctggaggggctgaagctgagcgactaccagcggctgcaaggcgcctactttcgcctggtgcaagacgacacggacgacaccttcgcgtatgcgtcaactggcgaggcgcctggccattga	MTQENRLPGWLTLDADAALVRLSRPAQCNGVSVDTLTLRAPTVRDIRLAGKVAGDDAEERELQLFASLAQVSRQDLEGLKLSDYQRLQGAYFRLVQDDTDDTFAYASTGEAPGH
ORF17	Phage tail tape measure protein	10849	13086	+	atgagtaaagacatggacctggtggtctccatcggcggcatcgccgacccctccttgggcaaggcattcgagaccgtcaaggcacggctcgacagtctccaggaacgttcccgccaggcgtccagcctgagggatgtgctgggagacgccatacgcctggagcgagaactcgccgatatgcgcaaggtcgggcaccgcggcgttgctgagcatgcccggcagcttggcgaacgccaggagcaactgaagcgactcggcatcgaggccagggccgcgggcgatgcctacgctcgactgggcgagatacagcgtggcctggatatgcaggtccgcggcctgcaacggctggagcaggccagccaggcaatgccattggctagcgcattttccggactggtc…	MSKDMDLVVSIGGIADPSLGKAFETVKARLDSLQERSRQASSLRDVLGDAIRLERELADMRKVGHRGVAEHARQLGERQEQLKRLGIEARAAGDAYARLGEIQRGLDMQVRGLQRLEQASQAMPLASAFSGLVVEASKTAAGYQARLRDLAIRNGLDAGREPALASLIQDSASQSGLGRTATLDMLEHLNATGMGFAAAQMNLGLAGRFGFGQGIASAEAAGLVRALQLAQGSDSPEQLSASLDRLVVLGKGRVGSEALARRLPALLSALGNAGEATAGDVGALGALLEIQAKNTTPDKADVRMKAWLEFVSSGSLKRAYGQNYDRDLEALRKDGASLLEANLELAARYRDKGGKLSAGAASPALEAYRASRGEFQGLLETQQSSVGSSERDAQRRKGM…
ORF18	pyocin R2_PP, tail formation protein U	13096	13968	+	atggcatatctggaacaattgcaggccggcctgaggtacctgggtcgcgccggcgagtccggacgcaagagtctggacaaggtggtcgctccggtgaacggcgcgatcagcgagatccgcggcgcagccgcggagctggagaacctgcccggcgtatcgccggaaatggctgcccggctgcagcgtgccatgcgcggcatcggccaggcgcagggcaaggtgaaccgcgtggtctccacctatgaccgggcgagccgggcgttgcttggtatcgacgaacgcctggatgcgctgaaggtccaggtgaacagtgccgcgcaggcggtcggcaaggtcgctggcgacatcagtccgacgctggcgggggtgctgccgtcgtggctgctggcaccctcggcg…	MAYLEQLQAGLRYLGRAGESGRKSLDKVVAPVNGAISEIRGAAAELENLPGVSPEMAARLQRAMRGIGQAQGKVNRVVSTYDRASRALLGIDERLDALKVQVNSAAQAVGKVAGDISPTLAGVLPSWLLAPSATPPSEAAAPLPHLLVLQPLTANAQPFYFNLNTAAFDALQRNSAYNWSGQVRLGRRPALQSVGMGEESILLKGAVFPLRRQVGNQEKVVGLEQLEALRRLAERREPLILSSGYGEVQMGLWCLVRISENQSALLGNGAPRKQTFDLEFKRYGDDLPNR
ORF19	pyocin R2_PP, tail protein X	13943	14149	+	atggcgacgacctgccgaaccgctgacggcgacatgctggacagcctctgctaccacgtctatggccatctgttgggctgcgtcgaggcgaccctcgacgccaatcccgggctggccgatgagcagcagccattccgcgccggcttgctgatcagtttccctgacatgccggtggtcaatgtcgaacaggtgcgcctgtgggattga	MATTCRTADGDMLDSLCYHVYGHLLGCVEATLDANPGLADEQQPFRAGLLISFPDMPVVNVEQVRLWD
ORF20	pyocin R2_PP, tail formation protein D	14207	15196	+	gtgcaaccgagtttccgtatcgttgccgacggcaccgacgtcacccagcggctgaatgaccgcctgctcaagctgaccttgctggacaagccgggcatggagtccgacagcctgatcttgaggctcgacgatcgcgatggacaggtggccttacccaggcgcggtgcggtgctggaggttcatctcggctatgccggcgagccactgatgcgcatgggacgctttaccgtggacaccttgcagtgggctggtccgccggactgcctgaccgttactgccaaggccggcgacatgcgcggcagtggcaagacgatacgcagcggcggttgggagggcactaccctggctcaggtctgccgcgatgttggcgcacgcaacggctggcgcgtggagtgtccg…	MQPSFRIVADGTDVTQRLNDRLLKLTLLDKPGMESDSLILRLDDRDGQVALPRRGAVLEVHLGYAGEPLMRMGRFTVDTLQWAGPPDCLTVTAKAGDMRGSGKTIRSGGWEGTTLAQVCRDVGARNGWRVECPLQVAIARVDQVNESDYHFVTRLARQYDCTAKLAEGMLMVLPRQSGQSATGRRIEPLVLGRADVGSFDVTFDDRSLMRTVKTRYQLPGSGEVKSVELKNPKAPATAMGEHVDRHLYASRGEAEQAAKARLASFSRSSASVRLELPGRGDLFAERSLLLQGFKAGIDGEFLIDSVEHTYSSSGWTTVVQCNGGRGGKG
ORF21	Glycoside hydrolase family 19	15229	15858	+	atgaaactgaccgagcagcaattgctgcgcatttttcccaacgcccgcctcgtcgcgggcgttttcgttgcggcgttgcaacgggccatggacgagagggagatcgacacaccggcgcggcgtgccgcgtttctcgcccaggtcggccacgaaagcagccagttgacccggctggtggagaacctcaactacagtgcccaaggcttggcggcgacctggccgagccgctatctcggccccgacgggcagcccaacgcgttggccttgcggctggcgcgcaatccgcaggcgattgccgacaacacctacgccacgcgcaacggcaatggcgacgaagcgtccggcgatggctggcgcttccgtgggcgtggcttgctacagatcaccgggcgtgccaac…	MKLTEQQLLRIFPNARLVAGVFVAALQRAMDEREIDTPARRAAFLAQVGHESSQLTRLVENLNYSAQGLAATWPSRYLGPDGQPNALALRLARNPQAIADNTYATRNGNGDEASGDGWRFRGRGLLQITGRANYRLVGEALGEPLEAEPWRLEQPVPAARSAAWWWAGHGLNELADRGEFAAITRRINGGLNGQAERLALWQRARAVLS
ORF22	Hypothetical protein	15855	16217	+	atgagccggctcgctctgctcctgccggccgtgttgctggtcctgctggccggcgccttgctcggcggcggcctggttgcccgccactatcgtccgcaactggaggaggccctgggccaactcactgccagccgcgtcgccagcggccagctcgaggctttgctcgatgagcagcagcgagcgctggcggcggtgcgggcgagcgccgagaggcgcgcgaaggacgtcgagcaggcactcggcgaggccagggcgcaggccgcggagcagtatgccgcggccgtgcgtctgctccgggaacccgacattggcacggactgccaggcggcaggtgcggcgatcgaccgggagctgggactatga	MSRLALLLPAVLLVLLAGALLGGGLVARHYRPQLEEALGQLTASRVASGQLEALLDEQQRALAAVRASAERRAKDVEQALGEARAQAAEQYAAAVRLLREPDIGTDCQAAGAAIDRELGL
ORF23	Lipoprotein	16214	16471	+	atgactcgtctcctgctggggctttgtctgcttttcgcgggctgcgcagcctcaccgacgacacctcgccccgtgcgcgtcgaggttcccctggcagtgccctgccgtgtacctgacgtgcgcccgccgagctgggccggcgccacgctgaaggccggcgattcgctgcaggccaaggttcgcgcattgctcgccgagcgccgccagcggcagggctacgaactcgaattgcaggcggcgttgcgtgcctgccgctaa	MTRLLLGLCLLFAGCAASPTTPRPVRVEVPLAVPCRVPDVRPPSWAGATLKAGDSLQAKVRALLAERRQRQGYELELQAALRACR
Sequences and annotation of the pyocin cluster 4-86_pyoR5. Start, stop and the strand for each gene are also shown.

## Sheet: 4-92_pyoR5
Position	Protein function	Start	Stop	Strand	Nucleotide sequence	Amino acid (AA) sequence
ORF01	Pyocin activator protein PrtN	315	1	-	gtgcagccaaccatcgcccctaccactccaattccacgccaggaaaccgtggaattggtctaccgcatcttcggcgacgtcctggtgccgctggagcaggtccgcgaacgctggtttcgcaacctgaacaaggaaaacttcagcaaggccctggcatgcgggcggatcgccctgccagtgacgaccctcgacgatagccacaaggccatgcagttcgtggccctcgatcacctcgccgcctacgtcgaccagcgcgcgaaccaagccggaagcgcccgtcgagcacagccaggcgcggacagcatcgcatcctga	MQPTIAPTTPIPRQETVELVYRIFGDVLVPLEQVRERWFRNLNKENFSKALACGRIALPVTTLDDSHKAMQFVALDHLAAYVDQRANQAGSARRAQPGADSIAS
ORF02	HTH-type transcriptional regulator PrtR	1185	415	-	atggacaagagcacccagatcccgcccgacagcttcgccgctcgcctcaagcaggccatggcgatgcgcaacctgaagcaggaaaccctcgccgaagcggcaggggtttcgcagaacaccattcacaagctgacctcgggcaaggcccagagcacccgcaagctgatcgagatcgcggcggccctgggcgtttcgccggtctggctgcagaccggcgaaggcactccagccgcgcgcagtgccgtgtccgtggccgatggcagcccattggtgctggaaccgctgcatccgtgggacagcgacacaccgctggacgaagacgaagtggaactgccgctgtacaaggaagtggagatgtccgccggcgccggacgcactgcggtacgcgagatagagggg…	MDKSTQIPPDSFAARLKQAMAMRNLKQETLAEAAGVSQNTIHKLTSGKAQSTRKLIEIAAALGVSPVWLQTGEGTPAARSAVSVADGSPLVLEPLHPWDSDTPLDEDEVELPLYKEVEMSAGAGRTAVREIEGRKLRFSYATLRASGVDPSAAICAQLTGNSMEPLIMDGSTIGVDTATTHITDGEIYALEHDGMLRVKFVYRLPGGGIRLRSFNREEYPDEEYSPEDMRSRQISMIGWVFWWSTVRHRRAPSLVR
ORF03	Hypothetical protein	1440	1270	-	atggacggcgctccggccctccagatgccggagcgctttcccgtggccccggcacccaagcagtcggcacctgcatcgtcggtcgccgacaaccgggtgtgtccctgcacccatgtgaaatctctgaaaggcgggtgggaagttgtggaactcaccccttccgctttctga	MDGAPALQMPERFPVAPAPKQSAPASSVADNRVCPCTHVKSLKGGWEVVELTPSAF
ORF04	Repressor, PtrB	1643	1843	+	atggctgaccttgccgatcacgccaacgaactggtcctggctcgcctcgacggcctcctggcggcgcgcccggcgctggccatccgcgagtccgcggaagactgcgaggactgcggcgagcccattccccaggcgcgccgtcgggcggcaccgggttgcagtcgctgcatcgactgccaggaccgccacgagcgccgttga	MADLADHANELVLARLDGLLAARPALAIRESAEDCEDCGEPIPQARRRAAPGCSRCIDCQDRHERR
ORF05	Antiterminator Q protein; RNA polymerase	1891	2250	+	gtgatcaaagccatcgatgaaatgctcaagctctgggccgaggaaatgcacgcgccaggcagcaacggaggcggctacgccggcggcaacctgatcgccatgctgatcgccagcaagggcgaggtggtccgcggccaccgtggcagccgggtgatcctcgaccgtgtggcggaggtcgatcgcctggtaaatcgcctacccgaggaactgaagaccgtggtggtggagcactatctcaatcgcgacagcttccccgagcagaagtaccgtcactgcggttgcagccgcaacaccttctatctgcgcctgcatgtggcgcaccagggtatccaggacggcctgctgcgacgggcggcctga	MIKAIDEMLKLWAEEMHAPGSNGGGYAGGNLIAMLIASKGEVVRGHRGSRVILDRVAEVDRLVNRLPEELKTVVVEHYLNRDSFPEQKYRHCGCSRNTFYLRLHVAHQGIQDGLLRRAA
ORF06	Pyocin R2, holin	2709	3062	+	atgggcaacgaaccgcagacactgacggaaatgccgctctgggtactgatcctgctcgccgcgctgggcggcgtcagcggcgagatgtggcgtgccgacaaggccggtctcggcggctgggccttgttgcggcgcctggcgctgcgctccggcgcgtcgatcgtctgcggcgtggcggtgatgctgctggcgttggcttgcggcgccgcgctgctgttcgccgcggcgctgggcagcctgaccgccgcggccggcgcggagatcgccgtcggtctctacgaacgctgggccgcccggcgcctgggggtttgcgagctgcccgaggaacagtcgggcgaccgtggcccgcattga	MGNEPQTLTEMPLWVLILLAALGGVSGEMWRADKAGLGGWALLRRLALRSGASIVCGVAVMLLALACGAALLFAAALGSLTAAAGAEIAVGLYERWAARRLGVCELPEEQSGDRGPH
ORF07	Collar PA0615; bacteriocin, pyocin	3084	3599	+	atgcctgaacaggctgttacgctcgaggctctgtacgcggccatcgagcaggtactgcgtgagcgtctgccggaggcgcagttgatcggcttctggccaggcgtgccggaaaataccccggcggtttccctggaaatggccgagctgctgcccgagcgcgatcccggtaccggcgagagcgccctgctgtgccgcctgcaggcgcggataatggtgccgcctggtgccgatcgccaggcggtatccattgcttgcggaatcgttcggacattgcgcgagcagacctggaacctgtctctggaaccggcgcgcttcgtacgctcggccgtcgacggcagtcgcgaggagctgaagagcctgcgtgtctggctggtcgagtggacgcagtcgctgcgtctc…	MPEQAVTLEALYAAIEQVLRERLPEAQLIGFWPGVPENTPAVSLEMAELLPERDPGTGESALLCRLQARIMVPPGADRQAVSIACGIVRTLREQTWNLSLEPARFVRSAVDGSREELKSLRVWLVEWTQSLRLGDPEWAWEDQPPGSLMLGFDPQTGPGHEPDYFAPEALA
ORF08	pyocin R2_PP, baseplate assembly protein V	3596	4153	+	atgagctatgtcagtgcggagcatgaccgcatgctcgccgcgatgatcctgccctgtgtggtggtcgccgtggacctggcagcggcgcgggtacgggtgcgctccggcgactggaccagcggctggctgcgctggcactccctggcagccggcaaggttcgccactggcgtgcgccgagcataggcgaacagggggtactgctcagtccgtcgggcggagtgtcaatgggtacctttattcccggtctgtacggcgatgcgggcacggcgccggacaacagcgccagcagtgagacctggcgtttcgacgacggcgcctcgttgagttacgactgggctgcgcatcgctaccgcgtcgagctgcccagcggcaccgtggaagtgagggtcggcgccagc…	MSYVSAEHDRMLAAMILPCVVVAVDLAAARVRVRSGDWTSGWLRWHSLAAGKVRHWRAPSIGEQGVLLSPSGGVSMGTFIPGLYGDAGTAPDNSASSETWRFDDGASLSYDWAAHRYRVELPSGTVEVRVGASEVRVSDGAVSLKAPKISLEGPVEIAGTLTVSGDILGGGSIIDTAGNSNHHTH
ORF09	pyocin R2_PP, baseplate assembly protein W	4306	4632	+	atgatcgggatggatcgccgtagcgggctgcccctgtccggcctggctcatcttaaacagtccgtcgaggacatcctgaccaccccgttgggcagcaggcgcatgcgccccgagtacggcagcaagctgcggcggatggtcgacatgccggtgagcgaaggctggaaaagcgccgtgcaggccgaggtagcccgttccctggggcgctgggaaccgcgcatcgcattgtctgccgtgcgagtcgtcgcagtcgtcgatggccgcgtggatctgctcctgagcggcgtgttcgagggcgagaacatcaatatggaggtctcggcgtga	MIGMDRRSGLPLSGLAHLKQSVEDILTTPLGSRRMRPEYGSKLRRMVDMPVSEGWKSAVQAEVARSLGRWEPRIALSAVRVVAVVDGRVDLLLSGVFEGENINMEVSA
ORF10	pyocin R2_PP, baseplate assembly protein J	4629	5516	+	gtgatcatcgatctttcccagttgccggagccagaggttatcgaaaacctcgatttcgagacgatttaccaggagctgttgggtgacttccgcgaagccatggctggcgaatggacagcggaggtggagtccgatccggttctcaagcttctgcaactggcggcctatcgagaactgctgctgcgggcgcggatcaacgatgcggcgcgggcggtgatgctggcatacgccagcggtgccgatctcgaccagatcggtgccggcttcaatgtgcagcgtttgctgatcaggcccgctcagcccgaggcggtaccgccggtggaggcgcaatacgagagcgacaagtcgctgcgcaatcgcatccagctcgcgttcgagcagctatccgtcgcaggaccg…	MIIDLSQLPEPEVIENLDFETIYQELLGDFREAMAGEWTAEVESDPVLKLLQLAAYRELLLRARINDAARAVMLAYASGADLDQIGAGFNVQRLLIRPAQPEAVPPVEAQYESDKSLRNRIQLAFEQLSVAGPRNAYIAHALGADGRVADASATSPAPCEVLISVLGVEGNGQAPEAVLQAVRLALNAEDVRPVADRVTVRSAGIVPYQVKAQLYLFPGPEAELIRAAAEASLRDYISAQRRLGRDIRRSALFATLHVEGVQRVELQEPAADVVLDETQAAYCTGYAITLGGVDE
ORF11	pyocin R2_PP, tail formation protein I	5509	6042	+	atgagtagccgactgctgccgccaaacaggagttcactggaacgctctctgggtgatgtattgcctgccgaactgccggtgccgcttcgtgagcttaacgatccggcacgctgtgaggcggccttgttgccctacctggcctggacgcgctcggtggaccgctgggacccggactggagcgacgaggccaagcgcaatgcggtagcgacgtccttcgtcctgcaccagcgcaaaggcacgctgaccgcgttgcgccaagtggtcgagccgatcggtgcgctgagcgaggtcaccgaatggtggcagcgaagcccgaccggcgtgccggggaccttcgagatcaccgtggacgtcagcgaccgtggcatcgacgaaggcaccgtactggagctggagcgc…	MSSRLLPPNRSSLERSLGDVLPAELPVPLRELNDPARCEAALLPYLAWTRSVDRWDPDWSDEAKRNAVATSFVLHQRKGTLTALRQVVEPIGALSEVTEWWQRSPTGVPGTFEITVDVSDRGIDEGTVLELERLLDDVRPVSRHLTRLDLRITPVIRSRHGLAVTDGDTLEIFPWKQ
ORF12	Tail fiber protein H, putative	6044	8152	+	atgacgaccaatactccgaaatacggtggcctgctcaccgacataggtgccgctgcgctggctgcggccagcgcagcaggcaagaaatggcagccgactcatatgctgatcggcgatgctggcggcgcaccgggtgctactccggatccgatacccgcagccacgcagacgaaactgatcaaccagcgctaccgggcgcagctcaatcgcttgttcgtgtcggacaagaacatcaatactctggttgccgaggtggtgctaccagttgaggtaggtggcttctggatccgcgagatcggcctgcaggatgccgacggcaagttcgtcgcggtatccaactgcccgcccagctacaaggcagcaatggaaagtggcagtgcgcggacccagaccattcgg…	MTTNTPKYGGLLTDIGAAALAAASAAGKKWQPTHMLIGDAGGAPGATPDPIPAATQTKLINQRYRAQLNRLFVSDKNINTLVAEVVLPVEVGGFWIREIGLQDADGKFVAVSNCPPSYKAAMESGSARTQTIRVNIALSGLENVQLLIDNGIIYATQDWVKEKVAADFKGRKILAGNGLVGGGDLSADRSIGLAPSGVTAGSYRSVTVNANGVVTQGSNPSTLAGYAIGDAYTKADTDGKLAQKANKATTLAGYGITDALRVDGNAVSSSRLAAPRSLAASGDASWSVTFDGSGNVSAPLSLSATGVAAGSYPKVTVDTKGRVTAGMALAATDIPGLDASKLVSGVLAEQRLPVFARGLATAVSTTSDPNTATVPLMLTNHANGPVAGRYFYIQSMFYP…
ORF13	Tail fiber assembly protein	8161	8601	+	atgatttttttccatgccgccactggcggtttctattcgaaggatgtccacggcgaccgcatgcccatcgacgcgcggatgtatcccctcgaggaagctgaatacctggcgctgttggtagcccagagcgagggcaagcagatcgtcgccgacgccgccggccgtccgttctgtatcgacccgccggccccggcagaagaggtcctggcccaccgtgagcgcatctggcgcgatcgccagttgacgcttactgatggccccatcgcccgtcaccgggatgagctcgacctgggcaagattacgaccctgaaccaggcgcaactgctcgaactcacgctgtaccgcgccagccttcgagactggccggcatccgcggcgtttcctgatttaggcgcaaga…	MIFFHAATGGFYSKDVHGDRMPIDARMYPLEEAEYLALLVAQSEGKQIVADAAGRPFCIDPPAPAEEVLAHRERIWRDRQLTLTDGPIARHRDELDLGKITTLNQAQLLELTLYRASLRDWPASAAFPDLGARPEPPLWLEPLITP
ORF14	pyocin R2_PP, tail sheath protein	8644	9804	+	atgagtttcttccacggcgttacggtaaccaacgtcgatatcggtgcgcgcaccatcgcgctgccggccagctccgtcatcggcctctgcgatgtgttcacgccgggggcgcaggcaagcgccaagcccaacgttccggtgctgctcaccagcaagaaggacgccgccgcggcgttcggcatcggctcgtcgatctatctggcctgcgaggccatctataaccgtgcccaggccgtgatcgtggcggtgggcgtggaagccgcggagactcccgaggcccaggccagcgccgtcataggtggtgtcagcgccgccggcgagcgcaccggactgcaggctctgctagacggcaagagccgcttcaatgctcagccgcgtctactagttgcgccgggtcat…	MSFFHGVTVTNVDIGARTIALPASSVIGLCDVFTPGAQASAKPNVPVLLTSKKDAAAAFGIGSSIYLACEAIYNRAQAVIVAVGVEAAETPEAQASAVIGGVSAAGERTGLQALLDGKSRFNAQPRLLVAPGHSAQQAVATAMDGLAEKLRAIAILDGPNSTDEAAVAYAKNFGSKRLFMVDPGVQVWDSATNAARNAPASAYAAGLFAWTDAEYGFWSSPSNKEIKGITGTSRPVEFLDGDETCRANLLNNANIATIIRDDGYRLWGNRTLSSDSKWAFVTRVRTMDLVMDAILAGHKWAVDRGITKTYVKDVTEGLRAFMRDLKNQGAVINFEVYADPDLNSASQLAQGKVYWNIRFTDVPPAENPNFRVEVTDQWLTEVLDVA
ORF15	Major tail tube protein	9817	10320	+	atgattccgcaaaccctgaccaataccaacctgttcatcgacggcgtgagcttcgccggtgacgtgccatccctgaccctgcccaagctggctgtgaagaccgagcaataccgtgccggcggcatggatgcgccggtatccatcgacatgggcctggaggcgatggaggccaagttctccaccaacggtgcccgccgagaagcactgaatttcttcggcctggccgaccagagcgctttcaatggcgtgttccgcggctccttcaagggccagaagggcgccagcgtgccagtggtggctaccctgcgcggcctgctcaaggaggtcgacccgggcgactggaaggccggcgagaaagccgagttcaagtacgccgttgcggtcagctactacaagctg…	MIPQTLTNTNLFIDGVSFAGDVPSLTLPKLAVKTEQYRAGGMDAPVSIDMGLEAMEAKFSTNGARREALNFFGLADQSAFNGVFRGSFKGQKGASVPVVATLRGLLKEVDPGDWKAGEKAEFKYAVAVSYYKLEVDGREVYEIDPVNGVRAINGVDQLAGMRNDLGL
ORF16	Phage tail assembly protein	10335	10679	+	atgacccaagagaatcgactgccgggctggctgacgctggatgccgacgccgccctcgttcgtctctcgcgtccggcacagtgcaacggggtcagcgtcgacacgctgaccctgcgtgcacccaccgtgcgtgatatccgcctggccggcaaggtggccggcgacgatgccgaggagcgcgaactgcaactgttcgcctcgctggcgcaggtcagccgccaggacctggaggggctgaagctgagcgactaccagcggctgcaaggcgcctactttcgcctggtgcaagacgacacggacgacaccttcgcgtatgcgtcaactggcgaggcgcctggccattga	MTQENRLPGWLTLDADAALVRLSRPAQCNGVSVDTLTLRAPTVRDIRLAGKVAGDDAEERELQLFASLAQVSRQDLEGLKLSDYQRLQGAYFRLVQDDTDDTFAYASTGEAPGH
ORF17	Phage tail tape measure protein	10849	13086	+	atgagtaaagacatggacctggtggtctccatcggcggcatcgccgacccctccttgggcaaggcattcgagaccgtcaaggcacggctcgacagtctccaggaacgttcccgccaggcgtccagcctgagggatgtgctgggagacgccatacgcctggagcgagaactcgccgatatgcgcaaggtcgggcaccgcggcgttgctgagcatgcccggcagcttggcgaacgccaggagcaactgaagcgactcggcatcgaggccagggccgcgggcgatgcctacgctcgactgggcgagatacagcgtggcctggatatgcaggtccgcggcctgcaacggctggagcaggccagccaggcaatgccattggctagcgcattttccggactggtc…	MSKDMDLVVSIGGIADPSLGKAFETVKARLDSLQERSRQASSLRDVLGDAIRLERELADMRKVGHRGVAEHARQLGERQEQLKRLGIEARAAGDAYARLGEIQRGLDMQVRGLQRLEQASQAMPLASAFSGLVVEASKTAAGYQARLRDLAIRNGLDAGREPALASLIQDSASQSGLGRTATLDMLEHLNATGMGFAAAQMNLGLAGRFGFGQGIASAEAAGLVRALQLAQGSDSPEQLSASLDRLVVLGKGRVGSEALARRLPALLSALGNAGEATAGDVGALGALLEIQAKNTTPDKADVRMKAWLEFVSSGSLKRAYGQNYDRDLEALRKDGASLLEANLELAARYRDKGGKLSAGAASPALEAYRASRGEFQGLLETQQSSVGSSERDAQRRKGM…
ORF18	pyocin R2_PP, tail formation protein U	13096	13968	+	atggcatatctggaacaattgcaggccggcctgaggtacctgggtcgcgccggcgagtccggacgcaagagtctggacaaggtggtcgctccggtgaacggcgcgatcagcgagatccgcggcgcagccgcggagctggagaacctgcccggcgtatcgccggaaatggctgcccggctgcagcgtgccatgcgcggcatcggccaggcgcagggcaaggtgaaccgcgtggtctccacctatgaccgggcgagccgggcgttgcttggtatcgacgaacgcctggatgcgctgaaggtccaggtgaacagtgccgcgcaggcggtcggcaaggtcgctggcgacatcagtccgacgctggcgggggtgctgccgtcgtggctgctggcaccctcggcg…	MAYLEQLQAGLRYLGRAGESGRKSLDKVVAPVNGAISEIRGAAAELENLPGVSPEMAARLQRAMRGIGQAQGKVNRVVSTYDRASRALLGIDERLDALKVQVNSAAQAVGKVAGDISPTLAGVLPSWLLAPSATPPSEAAAPLPHLLVLQPLTANAQPFYFNLNTAAFDALQRNSAYNWSGQVRLGRRPALQSVGMGEESILLKGAVFPLRRQVGNQEKVVGLEQLEALRRLAERREPLILSSGYGEVQMGLWCLVRISENQSALLGNGAPRKQTFDLEFKRYGDDLPNR
ORF19	pyocin R2_PP, tail protein X	13943	14149	+	atggcgacgacctgccgaaccgctgacggcgacatgctggacagcctctgctaccacgtctatggccatctgttgggctgcgtcgaggcgaccctcgacgccaatcccgggctggccgatgagcagcagccattccgcgccggcttgctgatcagtttccctgacatgccggtggtcaatgtcgaacaggtgcgcctgtgggattga	MATTCRTADGDMLDSLCYHVYGHLLGCVEATLDANPGLADEQQPFRAGLLISFPDMPVVNVEQVRLWD
ORF20	pyocin R2_PP, tail formation protein D	14207	15196	+	gtgcaaccgagtttccgtatcgttgccgacggcaccgacgtcacccagcggctgaatgaccgcctgctcaagctgaccttgctggacaagccgggcatggagtccgacagcctgatcttgaggctcgacgatcgcgatggacaggtggccttacccaggcgcggtgcggtgctggaggttcatctcggctatgccggcgagccactgatgcgcatgggacgctttaccgtggacaccttgcagtgggctggtccgccggactgcctgaccgttactgccaaggccggcgacatgcgcggcagtggcaagacgatacgcagcggcggttgggagggcactaccctggctcaggtctgccgcgatgttggcgcacgcaacggctggcgcgtggagtgtccg…	MQPSFRIVADGTDVTQRLNDRLLKLTLLDKPGMESDSLILRLDDRDGQVALPRRGAVLEVHLGYAGEPLMRMGRFTVDTLQWAGPPDCLTVTAKAGDMRGSGKTIRSGGWEGTTLAQVCRDVGARNGWRVECPLQVAIARVDQVNESDYHFVTRLARQYDCTAKLAEGMLMVLPRQSGQSATGRRIEPLVLGRADVGSFDVTFDDRSLMRTVKTRYQLPGSGEVKSVELKNPKAPATAMGEHVDRHLYASRGEAEQAAKARLASFSRSSASVRLELPGRGDLFAERSLLLQGFKAGIDGEFLIDSVEHTYSSSGWTTVVQCNGGRGGKG
ORF21	Glycoside hydrolase family 19	15229	15858	+	atgaaactgaccgagcagcaattgctgcgcatttttcccaacgcccgcctcgtcgcgggcgttttcgttgcggcgttgcaacgggccatggacgagagggagatcgacacaccggcgcggcgtgccgcgtttctcgcccaggtcggccacgaaagcagccagttgacccggctggtggagaacctcaactacagtgcccaaggcttggcggcgacctggccgagccgctatctcggccccgacgggcagcccaacgcgttggccttgcggctggcgcgcaatccgcaggcgattgccgacaacacctacgccacgcgcaacggcaatggcgacgaagcgtccggcgatggctggcgcttccgtgggcgtggcttgctacagatcaccgggcgtgccaac…	MKLTEQQLLRIFPNARLVAGVFVAALQRAMDEREIDTPARRAAFLAQVGHESSQLTRLVENLNYSAQGLAATWPSRYLGPDGQPNALALRLARNPQAIADNTYATRNGNGDEASGDGWRFRGRGLLQITGRANYRLVGEALGEPLEAEPWRLEQPVPAARSAAWWWAGHGLNELADRGEFAAITRRINGGLNGQAERLALWQRARAVLS
ORF22	Hypothetical protein	15855	16217	+	atgagccggctcgctctgctcctgccggccgtgttgctggtcctgctggccggcgccttgctcggcggcggcctggttgcccgccactatcgtccgcaactggaggaggccctgggccaactcactgccagccgcgtcgccagcggccagctcgaggctttgctcgatgagcagcagcgagcgctggcggcggtgcgggcgagcgccgagaggcgcgcgaaggacgtcgagcaggcactcggcgaggccagggcgcaggccgcggagcagtatgccgcggccgtgcgtctgctccgggaacccgacattggcacggactgccaggcggcaggtgcggcgatcgaccgggagctgggactatga	MSRLALLLPAVLLVLLAGALLGGGLVARHYRPQLEEALGQLTASRVASGQLEALLDEQQRALAAVRASAERRAKDVEQALGEARAQAAEQYAAAVRLLREPDIGTDCQAAGAAIDRELGL
ORF23	Lipoprotein	16214	16471	+	atgactcgtctcctgctggggctttgtctgcttttcgcgggctgcgcagcctcaccgacgacacctcgccccgtgcgcgtcgaggttcccctggcagtgccctgccgtgtacctgacgtgcgcccgccgagctgggccggcgccacgctgaaggccggcgattcgctgcaggccaaggttcgcgcattgctcgccgagcgccgccagcggcagggctacgaactcgaattgcaggcggcgttgcgtgcctgccgctaa	MTRLLLGLCLLFAGCAASPTTPRPVRVEVPLAVPCRVPDVRPPSWAGATLKAGDSLQAKVRALLAERRQRQGYELELQAALRACR
Sequences and annotation of the pyocin cluster 4-92_pyoR5. Start, stop and the strand for each gene are also shown.

## Sheet: 4-93_pyoR5
Position	Protein function	Start	Stop	Strand	Nucleotide sequence	Amino acid (AA) sequence
ORF01	Pyocin activator protein PrtN	315	1	-	gtgcagccaaccatcgcccctaccactccaattccacgccaggaaaccgtggaattggtctaccgcatcttcggcgacgtcctggtgccgctggagcaggtccgcgaacgctggtttcgcaacctgaacaaggaaaacttcagcaaggccctggcatgcgggcggatcgccctgccagtgacgaccctcgacgatagccacaaggccatgcagttcgtggccctcgatcacctcgccgcctacgtcgaccagcgcgcgaaccaagccggaagcgcccgtcgagcacagccaggcgcggacagcatcgcatcctga	MQPTIAPTTPIPRQETVELVYRIFGDVLVPLEQVRERWFRNLNKENFSKALACGRIALPVTTLDDSHKAMQFVALDHLAAYVDQRANQAGSARRAQPGADSIAS
ORF02	HTH-type transcriptional regulator PrtR	1185	415	-	atggacaagagcacccagatcccgcccgacagcttcgccgctcgcctcaagcaggccatggcgatgcgcaacctgaagcaggaaaccctcgccgaagcggcaggggtttcgcagaacaccattcacaagctgacctcgggcaaggcccagagcacccgcaagctgatcgagatcgcggcggccctgggcgtttcgccggtctggctgcagaccggcgaaggcactccagccgcgcgcagtgccgtgtccgtggccgatggcagcccattggtgctggaaccgctgcatccgtgggacagcgacacaccgctggacgaagacgaagtggaactgccgctgtacaaggaagtggagatgtccgccggcgccggacgcactgcggtacgcgagatagagggg…	MDKSTQIPPDSFAARLKQAMAMRNLKQETLAEAAGVSQNTIHKLTSGKAQSTRKLIEIAAALGVSPVWLQTGEGTPAARSAVSVADGSPLVLEPLHPWDSDTPLDEDEVELPLYKEVEMSAGAGRTAVREIEGRKLRFSYATLRASGVDPSAAICAQLTGNSMEPLIMDGSTIGVDTATTHITDGEIYALEHDGMLRVKFVYRLPGGGIRLRSFNREEYPDEEYSPEDMRSRQISMIGWVFWWSTVRHRRAPSLVR
ORF03	Hypothetical protein	1440	1270	-	atggacggcgctccggccctccagatgccggagcgctttcccgtggccccggcacccaagcagtcggcacctgcatcgtcggtcgccgacaaccgggtgtgtccctgcacccatgtgaaatctctgaaaggcgggtgggaagttgtggaactcaccccttccgctttctga	MDGAPALQMPERFPVAPAPKQSAPASSVADNRVCPCTHVKSLKGGWEVVELTPSAF
ORF04	Repressor, PtrB	1643	1843	+	atggctgaccttgccgatcacgccaacgaactggtcctggctcgcctcgacggcctcctggcggcgcgcccggcgctggccatccgcgagtccgcggaagactgcgaggactgcggcgagcccattccccaggcgcgccgtcgggcggcaccgggttgcagtcgctgcatcgactgccaggaccgccacgagcgccgttga	MADLADHANELVLARLDGLLAARPALAIRESAEDCEDCGEPIPQARRRAAPGCSRCIDCQDRHERR
ORF05	Antiterminator Q protein; RNA polymerase	1891	2250	+	gtgatcaaagccatcgatgaaatgctcaagctctgggccgaggaaatgcacgcgccaggcagcaacggaggcggctacgccggcggcaacctgatcgccatgctgatcgccagcaagggcgaggtggtccgcggccaccgtggcagccgggtgatcctcgaccgtgtggcggaggtcgatcgcctggtaaatcgcctacccgaggaactgaagaccgtggtggtggagcactatctcaatcgcgacagcttccccgagcagaagtaccgtcactgcggttgcagccgcaacaccttctatctgcgcctgcatgtggcgcaccagggtatccaggacggcctgctgcgacgggcggcctga	MIKAIDEMLKLWAEEMHAPGSNGGGYAGGNLIAMLIASKGEVVRGHRGSRVILDRVAEVDRLVNRLPEELKTVVVEHYLNRDSFPEQKYRHCGCSRNTFYLRLHVAHQGIQDGLLRRAA
ORF06	Pyocin R2, holin	2709	3062	+	atgggcaacgaaccgcagacactgacggaaatgccgctctgggtactgatcctgctcgccgcgctgggcggcgtcagcggcgagatgtggcgtgccgacaaggccggtctcggcggctgggccttgttgcggcgcctggcgctgcgctccggcgcgtcgatcgtctgcggcgtggcggtgatgctgctggcgttggcttgcggcgccgcgctgctgttcgccgcggcgctgggcagcctgaccgccgcggccggcgcggagatcgccgtcggtctctacgaacgctgggccgcccggcgcctgggggtttgcgagctgcccgaggaacagtcgggcgaccgtggcccgcattga	MGNEPQTLTEMPLWVLILLAALGGVSGEMWRADKAGLGGWALLRRLALRSGASIVCGVAVMLLALACGAALLFAAALGSLTAAAGAEIAVGLYERWAARRLGVCELPEEQSGDRGPH
ORF07	Collar PA0615; bacteriocin, pyocin	3084	3599	+	atgcctgaacaggctgttacgctcgaggctctgtacgcggccatcgagcaggtactgcgtgagcgtctgccggaggcgcagttgatcggcttctggccaggcgtgccggaaaataccccggcggtttccctggaaatggccgagctgctgcccgagcgcgatcccggtaccggcgagagcgccctgctgtgccgcctgcaggcgcggataatggtgccgcctggtgccgatcgccaggcggtatccattgcttgcggaatcgttcggacattgcgcgagcagacctggaacctgtctctggaaccggcgcgcttcgtacgctcggccgtcgacggcagtcgcgaggagctgaagagcctgcgtgtctggctggtcgagtggacgcagtcgctgcgtctc…	MPEQAVTLEALYAAIEQVLRERLPEAQLIGFWPGVPENTPAVSLEMAELLPERDPGTGESALLCRLQARIMVPPGADRQAVSIACGIVRTLREQTWNLSLEPARFVRSAVDGSREELKSLRVWLVEWTQSLRLGDPEWAWEDQPPGSLMLGFDPQTGPGHEPDYFAPEALA
ORF08	pyocin R2_PP, baseplate assembly protein V	3596	4153	+	atgagctatgtcagtgcggagcatgaccgcatgctcgccgcgatgatcctgccctgtgtggtggtcgccgtggacctggcagcggcgcgggtacgggtgcgctccggcgactggaccagcggctggctgcgctggcactccctggcagccggcaaggttcgccactggcgtgcgccgagcataggcgaacagggggtactgctcagtccgtcgggcggagtgtcaatgggtacctttattcccggtctgtacggcgatgcgggcacggcgccggacaacagcgccagcagtgagacctggcgtttcgacgacggcgcctcgttgagttacgactgggctgcgcatcgctaccgcgtcgagctgcccagcggcaccgtggaagtgagggtcggcgccagc…	MSYVSAEHDRMLAAMILPCVVVAVDLAAARVRVRSGDWTSGWLRWHSLAAGKVRHWRAPSIGEQGVLLSPSGGVSMGTFIPGLYGDAGTAPDNSASSETWRFDDGASLSYDWAAHRYRVELPSGTVEVRVGASEVRVSDGAVSLKAPKISLEGPVEIAGTLTVSGDILGGGSIIDTAGNSNHHTH
ORF09	pyocin R2_PP, baseplate assembly protein W	4306	4632	+	atgatcgggatggatcgccgtagcgggctgcccctgtccggcctggctcatcttaaacagtccgtcgaggacatcctgaccaccccgttgggcagcaggcgcatgcgccccgagtacggcagcaagctgcggcggatggtcgacatgccggtgagcgaaggctggaaaagcgccgtgcaggccgaggtagcccgttccctggggcgctgggaaccgcgcatcgcattgtctgccgtgcgagtcgtcgcagtcgtcgatggccgcgtggatctgctcctgagcggcgtgttcgagggcgagaacatcaatatggaggtctcggcgtga	MIGMDRRSGLPLSGLAHLKQSVEDILTTPLGSRRMRPEYGSKLRRMVDMPVSEGWKSAVQAEVARSLGRWEPRIALSAVRVVAVVDGRVDLLLSGVFEGENINMEVSA
ORF10	pyocin R2_PP, baseplate assembly protein J	4629	5516	+	gtgatcatcgatctttcccagttgccggagccagaggttatcgaaaacctcgatttcgagacgatttaccaggagctgttgggtgacttccgcgaagccatggctggcgaatggacagcggaggtggagtccgatccggttctcaagcttctgcaactggcggcctatcgagaactgctgctgcgggcgcggatcaacgatgcggcgcgggcggtgatgctggcatacgccagcggtgccgatctcgaccagatcggtgccggcttcaatgtgcagcgtttgctgatcaggcccgctcagcccgaggcggtaccgccggtggaggcgcaatacgagagcgacaagtcgctgcgcaatcgcatccagctcgcgttcgagcagctatccgtcgcaggaccg…	MIIDLSQLPEPEVIENLDFETIYQELLGDFREAMAGEWTAEVESDPVLKLLQLAAYRELLLRARINDAARAVMLAYASGADLDQIGAGFNVQRLLIRPAQPEAVPPVEAQYESDKSLRNRIQLAFEQLSVAGPRNAYIAHALGADGRVADASATSPAPCEVLISVLGVEGNGQAPEAVLQAVRLALNAEDVRPVADRVTVRSAGIVPYQVKAQLYLFPGPEAELIRAAAEASLRDYISAQRRLGRDIRRSALFATLHVEGVQRVELQEPAADVVLDETQAAYCTGYAITLGGVDE
ORF11	pyocin R2_PP, tail formation protein I	5509	6042	+	atgagtagccgactgctgccgccaaacaggagttcactggaacgctctctgggtgatgtattgcctgccgaactgccggtgccgcttcgtgagcttaacgatccggcacgctgtgaggcggccttgttgccctacctggcctggacgcgctcggtggaccgctgggacccggactggagcgacgaggccaagcgcaatgcggtagcgacgtccttcgtcctgcaccagcgcaaaggcacgctgaccgcgttgcgccaagtggtcgagccgatcggtgcgctgagcgaggtcaccgaatggtggcagcgaagcccgaccggcgtgccggggaccttcgagatcaccgtggacgtcagcgaccgtggcatcgacgaaggcaccgtactggagctggagcgc…	MSSRLLPPNRSSLERSLGDVLPAELPVPLRELNDPARCEAALLPYLAWTRSVDRWDPDWSDEAKRNAVATSFVLHQRKGTLTALRQVVEPIGALSEVTEWWQRSPTGVPGTFEITVDVSDRGIDEGTVLELERLLDDVRPVSRHLTRLDLRITPVIRSRHGLAVTDGDTLEIFPWKQ
ORF12	Tail fiber protein H, putative	6044	8152	+	atgacgaccaatactccgaaatacggtggcctgctcaccgacataggtgccgctgcgctggctgcggccagcgcagcaggcaagaaatggcagccgactcatatgctgatcggcgatgctggcggcgcaccgggtgctactccggatccgatacccgcagccacgcagacgaaactgatcaaccagcgctaccgggcgcagctcaatcgcttgttcgtgtcggacaagaacatcaatactctggttgccgaggtggtgctaccagttgaggtaggtggcttctggatccgcgagatcggcctgcaggatgccgacggcaagttcgtcgcggtatccaactgcccgcccagctacaaggcagcaatggaaagtggcagtgcgcggacccagaccattcgg…	MTTNTPKYGGLLTDIGAAALAAASAAGKKWQPTHMLIGDAGGAPGATPDPIPAATQTKLINQRYRAQLNRLFVSDKNINTLVAEVVLPVEVGGFWIREIGLQDADGKFVAVSNCPPSYKAAMESGSARTQTIRVNIALSGLENVQLLIDNGIIYATQDWVKEKVAADFKGRKILAGNGLVGGGDLSADRSIGLAPSGVTAGSYRSVTVNANGVVTQGSNPSTLAGYAIGDAYTKADTDGKLAQKANKATTLAGYGITDALRVDGNAVSSSRLAAPRSLAASGDASWSVTFDGSGNVSAPLSLSATGVAAGSYPKVTVDTKGRVTAGMALAATDIPGLDASKLVSGVLAEQRLPVFARGLATAVSTTSDPNTATVPLMLTNHANGPVAGRYFYIQSMFYP…
ORF13	Tail fiber assembly protein	8161	8601	+	atgatttttttccatgccgccactggcggtttctattcgaaggatgtccacggcgaccgcatgcccatcgacgcgcggatgtatcccctcgaggaagctgaatacctggcgctgttggtagcccagagcgagggcaagcagatcgtcgccgacgccgccggccgtccgttctgtatcgacccgccggccccggcagaagaggtcctggcccaccgtgagcgcatctggcgcgatcgccagttgacgcttactgatggccccatcgcccgtcaccgggatgagctcgacctgggcaagattacgaccctgaaccaggcgcaactgctcgaactcacgctgtaccgcgccagccttcgagactggccggcatccgcggcgtttcctgatttaggcgcaaga…	MIFFHAATGGFYSKDVHGDRMPIDARMYPLEEAEYLALLVAQSEGKQIVADAAGRPFCIDPPAPAEEVLAHRERIWRDRQLTLTDGPIARHRDELDLGKITTLNQAQLLELTLYRASLRDWPASAAFPDLGARPEPPLWLEPLITP
ORF14	pyocin R2_PP, tail sheath protein	8644	9804	+	atgagtttcttccacggcgttacggtaaccaacgtcgatatcggtgcgcgcaccatcgcgctgccggccagctccgtcatcggcctctgcgatgtgttcacgccgggggcgcaggcaagcgccaagcccaacgttccggtgctgctcaccagcaagaaggacgccgccgcggcgttcggcatcggctcgtcgatctatctggcctgcgaggccatctataaccgtgcccaggccgtgatcgtggcggtgggcgtggaagccgcggagactcccgaggcccaggccagcgccgtcataggtggtgtcagcgccgccggcgagcgcaccggactgcaggctctgctagacggcaagagccgcttcaatgctcagccgcgtctactagttgcgccgggtcat…	MSFFHGVTVTNVDIGARTIALPASSVIGLCDVFTPGAQASAKPNVPVLLTSKKDAAAAFGIGSSIYLACEAIYNRAQAVIVAVGVEAAETPEAQASAVIGGVSAAGERTGLQALLDGKSRFNAQPRLLVAPGHSAQQAVATAMDGLAEKLRAIAILDGPNSTDEAAVAYAKNFGSKRLFMVDPGVQVWDSATNAARNAPASAYAAGLFAWTDAEYGFWSSPSNKEIKGITGTSRPVEFLDGDETCRANLLNNANIATIIRDDGYRLWGNRTLSSDSKWAFVTRVRTMDLVMDAILAGHKWAVDRGITKTYVKDVTEGLRAFMRDLKNQGAVINFEVYADPDLNSASQLAQGKVYWNIRFTDVPPAENPNFRVEVTDQWLTEVLDVA
ORF15	Major tail tube protein	9817	10320	+	atgattccgcaaaccctgaccaataccaacctgttcatcgacggcgtgagcttcgccggtgacgtgccatccctgaccctgcccaagctggctgtgaagaccgagcaataccgtgccggcggcatggatgcgccggtatccatcgacatgggcctggaggcgatggaggccaagttctccaccaacggtgcccgccgagaagcactgaatttcttcggcctggccgaccagagcgctttcaatggcgtgttccgcggctccttcaagggccagaagggcgccagcgtgccagtggtggctaccctgcgcggcctgctcaaggaggtcgacccgggcgactggaaggccggcgagaaagccgagttcaagtacgccgttgcggtcagctactacaagctg…	MIPQTLTNTNLFIDGVSFAGDVPSLTLPKLAVKTEQYRAGGMDAPVSIDMGLEAMEAKFSTNGARREALNFFGLADQSAFNGVFRGSFKGQKGASVPVVATLRGLLKEVDPGDWKAGEKAEFKYAVAVSYYKLEVDGREVYEIDPVNGVRAINGVDQLAGMRNDLGL
ORF16	Phage tail assembly protein	10335	10679	+	atgacccaagagaatcgactgccgggctggctgacgctggatgccgacgccgccctcgttcgtctctcgcgtccggcacagtgcaacggggtcagcgtcgacacgctgaccctgcgtgcacccaccgtgcgtgatatccgcctggccggcaaggtggccggcgacgatgccgaggagcgcgaactgcaactgttcgcctcgctggcgcaggtcagccgccaggacctggaggggctgaagctgagcgactaccagcggctgcaaggcgcctactttcgcctggtgcaagacgacacggacgacaccttcgcgtatgcgtcaactggcgaggcgcctggccattga	MTQENRLPGWLTLDADAALVRLSRPAQCNGVSVDTLTLRAPTVRDIRLAGKVAGDDAEERELQLFASLAQVSRQDLEGLKLSDYQRLQGAYFRLVQDDTDDTFAYASTGEAPGH
ORF17	Phage tail tape measure protein	10849	13086	+	atgagtaaagacatggacctggtggtctccatcggcggcatcgccgacccctccttgggcaaggcattcgagaccgtcaaggcacggctcgacagtctccaggaacgttcccgccaggcgtccagcctgagggatgtgctgggagacgccatacgcctggagcgagaactcgccgatatgcgcaaggtcgggcaccgcggcgttgctgagcatgcccggcagcttggcgaacgccaggagcaactgaagcgactcggcatcgaggccagggccgcgggcgatgcctacgctcgactgggcgagatacagcgtggcctggatatgcaggtccgcggcctgcaacggctggagcaggccagccaggcaatgccattggctagcgcattttccggactggtc…	MSKDMDLVVSIGGIADPSLGKAFETVKARLDSLQERSRQASSLRDVLGDAIRLERELADMRKVGHRGVAEHARQLGERQEQLKRLGIEARAAGDAYARLGEIQRGLDMQVRGLQRLEQASQAMPLASAFSGLVVEASKTAAGYQARLRDLAIRNGLDAGREPALASLIQDSASQSGLGRTATLDMLEHLNATGMGFAAAQMNLGLAGRFGFGQGIASAEAAGLVRALQLAQGSDSPEQLSASLDRLVVLGKGRVGSEALARRLPALLSALGNAGEATAGDVGALGALLEIQAKNTTPDKADVRMKAWLEFVSSGSLKRAYGQNYDRDLEALRKDGASLLEANLELAARYRDKGGKLSAGAASPALEAYRASRGEFQGLLETQQSSVGSSERDAQRRKGM…
ORF18	pyocin R2_PP, tail formation protein U	13096	13968	+	atggcatatctggaacaattgcaggccggcctgaggtacctgggtcgcgccggcgagtccggacgcaagagtctggacaaggtggtcgctccggtgaacggcgcgatcagcgagatccgcggcgcagccgcggagctggagaacctgcccggcgtatcgccggaaatggctgcccggctgcagcgtgccatgcgcggcatcggccaggcgcagggcaaggtgaaccgcgtggtctccacctatgaccgggcgagccgggcgttgcttggtatcgacgaacgcctggatgcgctgaaggtccaggtgaacagtgccgcgcaggcggtcggcaaggtcgctggcgacatcagtccgacgctggcgggggtgctgccgtcgtggctgctggcaccctcggcg…	MAYLEQLQAGLRYLGRAGESGRKSLDKVVAPVNGAISEIRGAAAELENLPGVSPEMAARLQRAMRGIGQAQGKVNRVVSTYDRASRALLGIDERLDALKVQVNSAAQAVGKVAGDISPTLAGVLPSWLLAPSATPPSEAAAPLPHLLVLQPLTANAQPFYFNLNTAAFDALQRNSAYNWSGQVRLGRRPALQSVGMGEESILLKGAVFPLRRQVGNQEKVVGLEQLEALRRLAERREPLILSSGYGEVQMGLWCLVRISENQSALLGNGAPRKQTFDLEFKRYGDDLPNR
ORF19	pyocin R2_PP, tail protein X	13943	14149	+	atggcgacgacctgccgaaccgctgacggcgacatgctggacagcctctgctaccacgtctatggccatctgttgggctgcgtcgaggcgaccctcgacgccaatcccgggctggccgatgagcagcagccattccgcgccggcttgctgatcagtttccctgacatgccggtggtcaatgtcgaacaggtgcgcctgtgggattga	MATTCRTADGDMLDSLCYHVYGHLLGCVEATLDANPGLADEQQPFRAGLLISFPDMPVVNVEQVRLWD
ORF20	pyocin R2_PP, tail formation protein D	14207	15196	+	gtgcaaccgagtttccgtatcgttgccgacggcaccgacgtcacccagcggctgaatgaccgcctgctcaagctgaccttgctggacaagccgggcatggagtccgacagcctgatcttgaggctcgacgatcgcgatggacaggtggccttacccaggcgcggtgcggtgctggaggttcatctcggctatgccggcgagccactgatgcgcatgggacgctttaccgtggacaccttgcagtgggctggtccgccggactgcctgaccgttactgccaaggccggcgacatgcgcggcagtggcaagacgatacgcagcggcggttgggagggcactaccctggctcaggtctgccgcgatgttggcgcacgcaacggctggcgcgtggagtgtccg…	MQPSFRIVADGTDVTQRLNDRLLKLTLLDKPGMESDSLILRLDDRDGQVALPRRGAVLEVHLGYAGEPLMRMGRFTVDTLQWAGPPDCLTVTAKAGDMRGSGKTIRSGGWEGTTLAQVCRDVGARNGWRVECPLQVAIARVDQVNESDYHFVTRLARQYDCTAKLAEGMLMVLPRQSGQSATGRRIEPLVLGRADVGSFDVTFDDRSLMRTVKTRYQLPGSGEVKSVELKNPKAPATAMGEHVDRHLYASRGEAEQAAKARLASFSRSSASVRLELPGRGDLFAERSLLLQGFKAGIDGEFLIDSVEHTYSSSGWTTVVQCNGGRGGKG
ORF21	Glycoside hydrolase family 19	15229	15858	+	atgaaactgaccgagcagcaattgctgcgcatttttcccaacgcccgcctcgtcgcgggcgttttcgttgcggcgttgcaacgggccatggacgagagggagatcgacacaccggcgcggcgtgccgcgtttctcgcccaggtcggccacgaaagcagccagttgacccggctggtggagaacctcaactacagtgcccaaggcttggcggcgacctggccgagccgctatctcggccccgacgggcagcccaacgcgttggccttgcggctggcgcgcaatccgcaggcgattgccgacaacacctacgccacgcgcaacggcaatggcgacgaagcgtccggcgatggctggcgcttccgtgggcgtggcttgctacagatcaccgggcgtgccaac…	MKLTEQQLLRIFPNARLVAGVFVAALQRAMDEREIDTPARRAAFLAQVGHESSQLTRLVENLNYSAQGLAATWPSRYLGPDGQPNALALRLARNPQAIADNTYATRNGNGDEASGDGWRFRGRGLLQITGRANYRLVGEALGEPLEAEPWRLEQPVPAARSAAWWWAGHGLNELADRGEFAAITRRINGGLNGQAERLALWQRARAVLS
ORF22	Hypothetical protein	15855	16217	+	atgagccggctcgctctgctcctgccggccgtgttgctggtcctgctggccggcgccttgctcggcggcggcctggttgcccgccactatcgtccgcaactggaggaggccctgggccaactcactgccagccgcgtcgccagcggccagctcgaggctttgctcgatgagcagcagcgagcgctggcggcggtgcgggcgagcgccgagaggcgcgcgaaggacgtcgagcaggcactcggcgaggccagggcgcaggccgcggagcagtatgccgcggccgtgcgtctgctccgggaacccgacattggcacggactgccaggcggcaggtgcggcgatcgaccgggagctgggactatga	MSRLALLLPAVLLVLLAGALLGGGLVARHYRPQLEEALGQLTASRVASGQLEALLDEQQRALAAVRASAERRAKDVEQALGEARAQAAEQYAAAVRLLREPDIGTDCQAAGAAIDRELGL
ORF23	Lipoprotein	16214	16471	+	atgactcgtctcctgctggggctttgtctgcttttcgcgggctgcgcagcctcaccgacgacacctcgccccgtgcgcgtcgaggttcccctggcagtgccctgccgtgtacctgacgtgcgcccgccgagctgggccggcgccacgctgaaggccggcgattcgctgcaggccaaggttcgcgcattgctcgccgagcgccgccagcggcagggctacgaactcgaattgcaggcggcgttgcgtgcctgccgctaa	MTRLLLGLCLLFAGCAASPTTPRPVRVEVPLAVPCRVPDVRPPSWAGATLKAGDSLQAKVRALLAERRQRQGYELELQAALRACR
Sequences and annotation of the pyocin cluster 4-93_pyoR5. Start, stop and the strand for each gene are also shown.

## Sheet: 4-94_pyoR5
Position	Protein function	Start	Stop	Strand	Nucleotide sequence	Amino acid (AA) sequence
ORF01	Pyocin activator protein PrtN	315	1	-	gtgcagccaaccatcgcccctaccactccaattccacgccaggaaaccgtggaattggtctaccgcatcttcggcgacgtcctggtgccgctggagcaggtccgcgaacgctggtttcgcaacctgaacaaggaaaacttcagcaaggccctggcatgcgggcggatcgccctgccagtgacgaccctcgacgatagccacaaggccatgcagttcgtggccctcgatcacctcgccgcctacgtcgaccagcgcgcgaaccaagccggaagcgcccgtcgagcacagccaggcgcggacagcatcgcatcctga	MQPTIAPTTPIPRQETVELVYRIFGDVLVPLEQVRERWFRNLNKENFSKALACGRIALPVTTLDDSHKAMQFVALDHLAAYVDQRANQAGSARRAQPGADSIAS
ORF02	HTH-type transcriptional regulator PrtR	1185	415	-	atggacaagagcacccagatcccgcccgacagcttcgccgctcgcctcaagcaggccatggcgatgcgcaacctgaagcaggaaaccctcgccgaagcggcaggggtttcgcagaacaccattcacaagctgacctcgggcaaggcccagagcacccgcaagctgatcgagatcgcggcggccctgggcgtttcgccggtctggctgcagaccggcgaaggcactccagccgcgcgcagtgccgtgtccgtggccgatggcagcccattggtgctggaaccgctgcatccgtgggacagcgacacaccgctggacgaagacgaagtggaactgccgctgtacaaggaagtggagatgtccgccggcgccggacgcactgcggtacgcgagatagagggg…	MDKSTQIPPDSFAARLKQAMAMRNLKQETLAEAAGVSQNTIHKLTSGKAQSTRKLIEIAAALGVSPVWLQTGEGTPAARSAVSVADGSPLVLEPLHPWDSDTPLDEDEVELPLYKEVEMSAGAGRTAVREIEGRKLRFSYATLRASGVDPSAAICAQLTGNSMEPLIMDGSTIGVDTATTHITDGEIYALEHDGMLRVKFVYRLPGGGIRLRSFNREEYPDEEYSPEDMRSRQISMIGWVFWWSTVRHRRAPSLVR
ORF03	Hypothetical protein	1440	1270	-	atggacggcgctccggccctccagatgccggagcgctttcccgtggccccggcacccaagcagtcggcacctgcatcgtcggtcgccgacaaccgggtgtgtccctgcacccatgtgaaatctctgaaaggcgggtgggaagttgtggaactcaccccttccgctttctga	MDGAPALQMPERFPVAPAPKQSAPASSVADNRVCPCTHVKSLKGGWEVVELTPSAF
ORF04	Repressor, PtrB	1643	1843	+	atggctgaccttgccgatcacgccaacgaactggtcctggctcgcctcgacggcctcctggcggcgcgcccggcgctggccatccgcgagtccgcggaagactgcgaggactgcggcgagcccattccccaggcgcgccgtcgggcggcaccgggttgcagtcgctgcatcgactgccaggaccgccacgagcgccgttga	MADLADHANELVLARLDGLLAARPALAIRESAEDCEDCGEPIPQARRRAAPGCSRCIDCQDRHERR
ORF05	Antiterminator Q protein; RNA polymerase	1891	2250	+	gtgatcaaagccatcgatgaaatgctcaagctctgggccgaggaaatgcacgcgccaggcagcaacggaggcggctacgccggcggcaacctgatcgccatgctgatcgccagcaagggcgaggtggtccgcggccaccgtggcagccgggtgatcctcgaccgtgtggcggaggtcgatcgcctggtaaatcgcctacccgaggaactgaagaccgtggtggtggagcactatctcaatcgcgacagcttccccgagcagaagtaccgtcactgcggttgcagccgcaacaccttctatctgcgcctgcatgtggcgcaccagggtatccaggacggcctgctgcgacgggcggcctga	MIKAIDEMLKLWAEEMHAPGSNGGGYAGGNLIAMLIASKGEVVRGHRGSRVILDRVAEVDRLVNRLPEELKTVVVEHYLNRDSFPEQKYRHCGCSRNTFYLRLHVAHQGIQDGLLRRAA
ORF06	Pyocin R2, holin	2709	3062	+	atgggcaacgaaccgcagacactgacggaaatgccgctctgggtactgatcctgctcgccgcgctgggcggcgtcagcggcgagatgtggcgtgccgacaaggccggtctcggcggctgggccttgttgcggcgcctggcgctgcgctccggcgcgtcgatcgtctgcggcgtggcggtgatgctgctggcgttggcttgcggcgccgcgctgctgttcgccgcggcgctgggcagcctgaccgccgcggccggcgcggagatcgccgtcggtctctacgaacgctgggccgcccggcgcctgggggtttgcgagctgcccgaggaacagtcgggcgaccgtggcccgcattga	MGNEPQTLTEMPLWVLILLAALGGVSGEMWRADKAGLGGWALLRRLALRSGASIVCGVAVMLLALACGAALLFAAALGSLTAAAGAEIAVGLYERWAARRLGVCELPEEQSGDRGPH
ORF07	Collar PA0615; bacteriocin, pyocin	3084	3599	+	atgcctgaacaggctgttacgctcgaggctctgtacgcggccatcgagcaggtactgcgtgagcgtctgccggaggcgcagttgatcggcttctggccaggcgtgccggaaaataccccggcggtttccctggaaatggccgagctgctgcccgagcgcgatcccggtaccggcgagagcgccctgctgtgccgcctgcaggcgcggataatggtgccgcctggtgccgatcgccaggcggtatccattgcttgcggaatcgttcggacattgcgcgagcagacctggaacctgtctctggaaccggcgcgcttcgtacgctcggccgtcgacggcagtcgcgaggagctgaagagcctgcgtgtctggctggtcgagtggacgcagtcgctgcgtctc…	MPEQAVTLEALYAAIEQVLRERLPEAQLIGFWPGVPENTPAVSLEMAELLPERDPGTGESALLCRLQARIMVPPGADRQAVSIACGIVRTLREQTWNLSLEPARFVRSAVDGSREELKSLRVWLVEWTQSLRLGDPEWAWEDQPPGSLMLGFDPQTGPGHEPDYFAPEALA
ORF08	pyocin R2_PP, baseplate assembly protein V	3596	4153	+	atgagctatgtcagtgcggagcatgaccgcatgctcgccgcgatgatcctgccctgtgtggtggtcgccgtggacctggcagcggcgcgggtacgggtgcgctccggcgactggaccagcggctggctgcgctggcactccctggcagccggcaaggttcgccactggcgtgcgccgagcataggcgaacagggggtactgctcagtccgtcgggcggagtgtcaatgggtacctttattcccggtctgtacggcgatgcgggcacggcgccggacaacagcgccagcagtgagacctggcgtttcgacgacggcgcctcgttgagttacgactgggctgcgcatcgctaccgcgtcgagctgcccagcggcaccgtggaagtgagggtcggcgccagc…	MSYVSAEHDRMLAAMILPCVVVAVDLAAARVRVRSGDWTSGWLRWHSLAAGKVRHWRAPSIGEQGVLLSPSGGVSMGTFIPGLYGDAGTAPDNSASSETWRFDDGASLSYDWAAHRYRVELPSGTVEVRVGASEVRVSDGAVSLKAPKISLEGPVEIAGTLTVSGDILGGGSIIDTAGNSNHHTH
ORF09	pyocin R2_PP, baseplate assembly protein W	4306	4632	+	atgatcgggatggatcgccgtagcgggctgcccctgtccggcctggctcatcttaaacagtccgtcgaggacatcctgaccaccccgttgggcagcaggcgcatgcgccccgagtacggcagcaagctgcggcggatggtcgacatgccggtgagcgaaggctggaaaagcgccgtgcaggccgaggtagcccgttccctggggcgctgggaaccgcgcatcgcattgtctgccgtgcgagtcgtcgcagtcgtcgatggccgcgtggatctgctcctgagcggcgtgttcgagggcgagaacatcaatatggaggtctcggcgtga	MIGMDRRSGLPLSGLAHLKQSVEDILTTPLGSRRMRPEYGSKLRRMVDMPVSEGWKSAVQAEVARSLGRWEPRIALSAVRVVAVVDGRVDLLLSGVFEGENINMEVSA
ORF10	pyocin R2_PP, baseplate assembly protein J	4629	5516	+	gtgatcatcgatctttcccagttgccggagccagaggttatcgaaaacctcgatttcgagacgatttaccaggagctgttgggtgacttccgcgaagccatggctggcgaatggacagcggaggtggagtccgatccggttctcaagcttctgcaactggcggcctatcgagaactgctgctgcgggcgcggatcaacgatgcggcgcgggcggtgatgctggcatacgccagcggtgccgatctcgaccagatcggtgccggcttcaatgtgcagcgtttgctgatcaggcccgctcagcccgaggcggtaccgccggtggaggcgcaatacgagagcgacaagtcgctgcgcaatcgcatccagctcgcgttcgagcagctatccgtcgcaggaccg…	MIIDLSQLPEPEVIENLDFETIYQELLGDFREAMAGEWTAEVESDPVLKLLQLAAYRELLLRARINDAARAVMLAYASGADLDQIGAGFNVQRLLIRPAQPEAVPPVEAQYESDKSLRNRIQLAFEQLSVAGPRNAYIAHALGADGRVADASATSPAPCEVLISVLGVEGNGQAPEAVLQAVRLALNAEDVRPVADRVTVRSAGIVPYQVKAQLYLFPGPEAELIRAAAEASLRDYISAQRRLGRDIRRSALFATLHVEGVQRVELQEPAADVVLDETQAAYCTGYAITLGGVDE
ORF11	pyocin R2_PP, tail formation protein I	5509	6042	+	atgagtagccgactgctgccgccaaacaggagttcactggaacgctctctgggtgatgtattgcctgccgaactgccggtgccgcttcgtgagcttaacgatccggcacgctgtgaggcggccttgttgccctacctggcctggacgcgctcggtggaccgctgggacccggactggagcgacgaggccaagcgcaatgcggtagcgacgtccttcgtcctgcaccagcgcaaaggcacgctgaccgcgttgcgccaagtggtcgagccgatcggtgcgctgagcgaggtcaccgaatggtggcagcgaagcccgaccggcgtgccggggaccttcgagatcaccgtggacgtcagcgaccgtggcatcgacgaaggcaccgtactggagctggagcgc…	MSSRLLPPNRSSLERSLGDVLPAELPVPLRELNDPARCEAALLPYLAWTRSVDRWDPDWSDEAKRNAVATSFVLHQRKGTLTALRQVVEPIGALSEVTEWWQRSPTGVPGTFEITVDVSDRGIDEGTVLELERLLDDVRPVSRHLTRLDLRITPVIRSRHGLAVTDGDTLEIFPWKQ
ORF12	Tail fiber protein H, putative	6044	8152	+	atgacgaccaatactccgaaatacggtggcctgctcaccgacataggtgccgctgcgctggctgcggccagcgcagcaggcaagaaatggcagccgactcatatgctgatcggcgatgctggcggcgcaccgggtgctactccggatccgatacccgcagccacgcagacgaaactgatcaaccagcgctaccgggcgcagctcaatcgcttgttcgtgtcggacaagaacatcaatactctggttgccgaggtggtgctaccagttgaggtaggtggcttctggatccgcgagatcggcctgcaggatgccgacggcaagttcgtcgcggtatccaactgcccgcccagctacaaggcagcaatggaaagtggcagtgcgcggacccagaccattcgg…	MTTNTPKYGGLLTDIGAAALAAASAAGKKWQPTHMLIGDAGGAPGATPDPIPAATQTKLINQRYRAQLNRLFVSDKNINTLVAEVVLPVEVGGFWIREIGLQDADGKFVAVSNCPPSYKAAMESGSARTQTIRVNIALSGLENVQLLIDNGIIYATQDWVKEKVAADFKGRKILAGNGLVGGGDLSADRSIGLAPSGVTAGSYRSVTVNANGVVTQGSNPSTLAGYAIGDAYTKADTDGKLAQKANKATTLAGYGITDALRVDGNAVSSSRLAAPRSLAASGDASWSVTFDGSGNVSAPLSLSATGVAAGSYPKVTVDTKGRVTAGMALAATDIPGLDASKLVSGVLAEQRLPVFARGLATAVSTTSDPNTATVPLMLTNHANGPVAGRYFYIQSMFYP…
ORF13	Tail fiber assembly protein	8161	8601	+	atgatttttttccatgccgccactggcggtttctattcgaaggatgtccacggcgaccgcatgcccatcgacgcgcggatgtatcccctcgaggaagctgaatacctggcgctgttggtagcccagagcgagggcaagcagatcgtcgccgacgccgccggccgtccgttctgtatcgacccgccggccccggcagaagaggtcctggcccaccgtgagcgcatctggcgcgatcgccagttgacgcttactgatggccccatcgcccgtcaccgggatgagctcgacctgggcaagattacgaccctgaaccaggcgcaactgctcgaactcacgctgtaccgcgccagccttcgagactggccggcatccgcggcgtttcctgatttaggcgcaaga…	MIFFHAATGGFYSKDVHGDRMPIDARMYPLEEAEYLALLVAQSEGKQIVADAAGRPFCIDPPAPAEEVLAHRERIWRDRQLTLTDGPIARHRDELDLGKITTLNQAQLLELTLYRASLRDWPASAAFPDLGARPEPPLWLEPLITP
ORF14	pyocin R2_PP, tail sheath protein	8644	9804	+	atgagtttcttccacggcgttacggtaaccaacgtcgatatcggtgcgcgcaccatcgcgctgccggccagctccgtcatcggcctctgcgatgtgttcacgccgggggcgcaggcaagcgccaagcccaacgttccggtgctgctcaccagcaagaaggacgccgccgcggcgttcggcatcggctcgtcgatctatctggcctgcgaggccatctataaccgtgcccaggccgtgatcgtggcggtgggcgtggaagccgcggagactcccgaggcccaggccagcgccgtcataggtggtgtcagcgccgccggcgagcgcaccggactgcaggctctgctagacggcaagagccgcttcaatgctcagccgcgtctactagttgcgccgggtcat…	MSFFHGVTVTNVDIGARTIALPASSVIGLCDVFTPGAQASAKPNVPVLLTSKKDAAAAFGIGSSIYLACEAIYNRAQAVIVAVGVEAAETPEAQASAVIGGVSAAGERTGLQALLDGKSRFNAQPRLLVAPGHSAQQAVATAMDGLAEKLRAIAILDGPNSTDEAAVAYAKNFGSKRLFMVDPGVQVWDSATNAARNAPASAYAAGLFAWTDAEYGFWSSPSNKEIKGITGTSRPVEFLDGDETCRANLLNNANIATIIRDDGYRLWGNRTLSSDSKWAFVTRVRTMDLVMDAILAGHKWAVDRGITKTYVKDVTEGLRAFMRDLKNQGAVINFEVYADPDLNSASQLAQGKVYWNIRFTDVPPAENPNFRVEVTDQWLTEVLDVA
ORF15	Major tail tube protein	9817	10320	+	atgattccgcaaaccctgaccaataccaacctgttcatcgacggcgtgagcttcgccggtgacgtgccatccctgaccctgcccaagctggctgtgaagaccgagcaataccgtgccggcggcatggatgcgccggtatccatcgacatgggcctggaggcgatggaggccaagttctccaccaacggtgcccgccgagaagcactgaatttcttcggcctggccgaccagagcgctttcaatggcgtgttccgcggctccttcaagggccagaagggcgccagcgtgccagtggtggctaccctgcgcggcctgctcaaggaggtcgacccgggcgactggaaggccggcgagaaagccgagttcaagtacgccgttgcggtcagctactacaagctg…	MIPQTLTNTNLFIDGVSFAGDVPSLTLPKLAVKTEQYRAGGMDAPVSIDMGLEAMEAKFSTNGARREALNFFGLADQSAFNGVFRGSFKGQKGASVPVVATLRGLLKEVDPGDWKAGEKAEFKYAVAVSYYKLEVDGREVYEIDPVNGVRAINGVDQLAGMRNDLGL
ORF16	Phage tail assembly chaperon protein	10335	10679	+	atgacccaagagaatcgactgccgggctggctgacgctggatgccgacgccgccctcgttcgtctctcgcgtccggcacagtgcaacggggtcagcgtcgacacgctgaccctgcgtgcacccaccgtgcgtgatatccgcctggccggcaaggtggccggcgacgatgccgaggagcgcgaactgcaactgttcgcctcgctggcgcaggtcagccgccaggacctggaggggctgaagctgagcgactaccagcggctgcaaggcgcctactttcgcctggtgcaagacgacacggacgacaccttcgcgtatgcgtcaactggcgaggcgcctggccattga	MTQENRLPGWLTLDADAALVRLSRPAQCNGVSVDTLTLRAPTVRDIRLAGKVAGDDAEERELQLFASLAQVSRQDLEGLKLSDYQRLQGAYFRLVQDDTDDTFAYASTGEAPGH
ORF17	Phage tail tape measure protein	10849	13086	+	atgagtaaagacatggacctggtggtctccatcggcggcatcgccgacccctccttgggcaaggcattcgagaccgtcaaggcacggctcgacagtctccaggaacgttcccgccaggcgtccagcctgagggatgtgctgggagacgccatacgcctggagcgagaactcgccgatatgcgcaaggtcgggcaccgcggcgttgctgagcatgcccggcagcttggcgaacgccaggagcaactgaagcgactcggcatcgaggccagggccgcgggcgatgcctacgctcgactgggcgagatacagcgtggcctggatatgcaggtccgcggcctgcaacggctggagcaggccagccaggcaatgccattggctagcgcattttccggactggtc…	MSKDMDLVVSIGGIADPSLGKAFETVKARLDSLQERSRQASSLRDVLGDAIRLERELADMRKVGHRGVAEHARQLGERQEQLKRLGIEARAAGDAYARLGEIQRGLDMQVRGLQRLEQASQAMPLASAFSGLVVEASKTAAGYQARLRDLAIRNGLDAGREPALASLIQDSASQSGLGRTATLDMLEHLNATGMGFAAAQMNLGLAGRFGFGQGIASAEAAGLVRALQLAQGSDSPEQLSASLDRLVVLGKGRVGSEALARRLPALLSALGNAGEATAGDVGALGALLEIQAKNTTPDKADVRMKAWLEFVSSGSLKRAYGQNYDRDLEALRKDGASLLEANLELAARYRDKGGKLSAGAASPALEAYRASRGEFQGLLETQQSSVGSSERDAQRRKGM…
ORF18	pyocin R2_PP, tail formation protein U	13096	13968	+	atggcatatctggaacaattgcaggccggcctgaggtacctgggtcgcgccggcgagtccggacgcaagagtctggacaaggtggtcgctccggtgaacggcgcgatcagcgagatccgcggcgcagccgcggagctggagaacctgcccggcgtatcgccggaaatggctgcccggctgcagcgtgccatgcgcggcatcggccaggcgcagggcaaggtgaaccgcgtggtctccacctatgaccgggcgagccgggcgttgcttggtatcgacgaacgcctggatgcgctgaaggtccaggtgaacagtgccgcgcaggcggtcggcaaggtcgctggcgacatcagtccgacgctggcgggggtgctgccgtcgtggctgctggcaccctcggcg…	MAYLEQLQAGLRYLGRAGESGRKSLDKVVAPVNGAISEIRGAAAELENLPGVSPEMAARLQRAMRGIGQAQGKVNRVVSTYDRASRALLGIDERLDALKVQVNSAAQAVGKVAGDISPTLAGVLPSWLLAPSATPPSEAAAPLPHLLVLQPLTANAQPFYFNLNTAAFDALQRNSAYNWSGQVRLGRRPALQSVGMGEESILLKGAVFPLRRQVGNQEKVVGLEQLEALRRLAERREPLILSSGYGEVQMGLWCLVRISENQSALLGNGAPRKQTFDLEFKRYGDDLPNR
ORF19	pyocin R2_PP, tail protein X	13943	14149	+	atggcgacgacctgccgaaccgctgacggcgacatgctggacagcctctgctaccacgtctatggccatctgttgggctgcgtcgaggcgaccctcgacgccaatcccgggctggccgatgagcagcagccattccgcgccggcttgctgatcagtttccctgacatgccggtggtcaatgtcgaacaggtgcgcctgtgggattga	MATTCRTADGDMLDSLCYHVYGHLLGCVEATLDANPGLADEQQPFRAGLLISFPDMPVVNVEQVRLWD
ORF20	pyocin R2_PP, tail formation protein D	14207	15196	+	gtgcaaccgagtttccgtatcgttgccgacggcaccgacgtcacccagcggctgaatgaccgcctgctcaagctgaccttgctggacaagccgggcatggagtccgacagcctgatcttgaggctcgacgatcgcgatggacaggtggccttacccaggcgcggtgcggtgctggaggttcatctcggctatgccggcgagccactgatgcgcatgggacgctttaccgtggacaccttgcagtgggctggtccgccggactgcctgaccgttactgccaaggccggcgacatgcgcggcagtggcaagacgatacgcagcggcggttgggagggcactaccctggctcaggtctgccgcgatgttggcgcacgcaacggctggcgcgtggagtgtccg…	MQPSFRIVADGTDVTQRLNDRLLKLTLLDKPGMESDSLILRLDDRDGQVALPRRGAVLEVHLGYAGEPLMRMGRFTVDTLQWAGPPDCLTVTAKAGDMRGSGKTIRSGGWEGTTLAQVCRDVGARNGWRVECPLQVAIARVDQVNESDYHFVTRLARQYDCTAKLAEGMLMVLPRQSGQSATGRRIEPLVLGRADVGSFDVTFDDRSLMRTVKTRYQLPGSGEVKSVELKNPKAPATAMGEHVDRHLYASRGEAEQAAKARLASFSRSSASVRLELPGRGDLFAERSLLLQGFKAGIDGEFLIDSVEHTYSSSGWTTVVQCNGGRGGKG
ORF21	Glycoside hydrolase family 19	15229	15858	+	atgaaactgaccgagcagcaattgctgcgcatttttcccaacgcccgcctcgtcgcgggcgttttcgttgcggcgttgcaacgggccatggacgagagggagatcgacacaccggcgcggcgtgccgcgtttctcgcccaggtcggccacgaaagcagccagttgacccggctggtggagaacctcaactacagtgcccaaggcttggcggcgacctggccgagccgctatctcggccccgacgggcagcccaacgcgttggccttgcggctggcgcgcaatccgcaggcgattgccgacaacacctacgccacgcgcaacggcaatggcgacgaagcgtccggcgatggctggcgcttccgtgggcgtggcttgctacagatcaccgggcgtgccaac…	MKLTEQQLLRIFPNARLVAGVFVAALQRAMDEREIDTPARRAAFLAQVGHESSQLTRLVENLNYSAQGLAATWPSRYLGPDGQPNALALRLARNPQAIADNTYATRNGNGDEASGDGWRFRGRGLLQITGRANYRLVGEALGEPLEAEPWRLEQPVPAARSAAWWWAGHGLNELADRGEFAAITRRINGGLNGQAERLALWQRARAVLS
ORF22	Hypothetical protein	15855	16217	+	atgagccggctcgctctgctcctgccggccgtgttgctggtcctgctggccggcgccttgctcggcggcggcctggttgcccgccactatcgtccgcaactggaggaggccctgggccaactcactgccagccgcgtcgccagcggccagctcgaggctttgctcgatgagcagcagcgagcgctggcggcggtgcgggcgagcgccgagaggcgcgcgaaggacgtcgagcaggcactcggcgaggccagggcgcaggccgcggagcagtatgccgcggccgtgcgtctgctccgggaacccgacattggcacggactgccaggcggcaggtgcggcgatcgaccgggagctgggactatga	MSRLALLLPAVLLVLLAGALLGGGLVARHYRPQLEEALGQLTASRVASGQLEALLDEQQRALAAVRASAERRAKDVEQALGEARAQAAEQYAAAVRLLREPDIGTDCQAAGAAIDRELGL
ORF23	Lipoprotein	16214	16471	+	atgactcgtctcctgctggggctttgtctgcttttcgcgggctgcgcagcctcaccgacgacacctcgccccgtgcgcgtcgaggttcccctggcagtgccctgccgtgtacctgacgtgcgcccgccgagctgggccggcgccacgctgaaggccggcgattcgctgcaggccaaggttcgcgcattgctcgccgagcgccgccagcggcagggctacgaactcgaattgcaggcggcgttgcgtgcctgccgctaa	MTRLLLGLCLLFAGCAASPTTPRPVRVEVPLAVPCRVPDVRPPSWAGATLKAGDSLQAKVRALLAERRQRQGYELELQAALRACR
Sequences and annotation of the pyocin cluster 4-94_pyoR5. Start, stop and the strand for each gene are also shown.

[truncated: 22 more sheets: 4-120_pyoR5, 4-121_pyoR5, 9-41_pyoR5, C11_pyoR5, C58_pyoR5, G6_pyoR5, G7_pyoR5, G26_pyoR5, G31_pyoR5, H18_pyoR5, H52_pyoR5, 3-5_pyoR2F2, 3-38_pyoR2F2, 3-41_pyoR2F2, 3-58_pyoR2F2, 9-86_pyoR2F2, 5-23_pyoR2F(PA14), 6-25_pyoR2F(PA14), 8-24_pyoR2F(PA14), 8-36_pyoR2F(PA14) …]
